1 **Long title**

2 Predictors of long-term recreational exercise participation in adolescents and young adults.

3

4 **Short title**

5 Predictors of long-term recreational exercise participation in adolescents and young adults.

6

7

8 Julie A. Morgan<sup>1¶</sup>, Jana M. Bednarz<sup>2¶</sup>, Ronnie Semo<sup>3</sup>, Scott R. Clark<sup>2,4&</sup>, K. Oliver Schubert<sup>2,5,6&\*</sup>

9

10

11

12

13 <sup>1</sup> Discipline of Psychiatry, Adelaide Medical School, University of Adelaide, Adelaide, SA, Australia

14 <sup>2</sup> Adelaide Health Technology Assessment, School of Public Health, University of Adelaide, Adelaide, SA,  
15 Australia

16 <sup>3</sup> National Centre for Vocational Education Research (NCVER), Adelaide, SA, Australia

17 <sup>4</sup> The Queen Elizabeth Hospital, Central Adelaide Local Health Network, Adelaide, SA, Australia

18 <sup>5</sup> Northern Adelaide Mental Health Service, SA Health, Salisbury, SA, Australia

19 <sup>6</sup> headspace Early Psychosis, headspace Adelaide, Sonder, Adelaide, SA, Australia

20

21 \*Corresponding author

22 E-mail: [Oliver.Schubert@adelaide.edu.au](mailto:Oliver.Schubert@adelaide.edu.au)

23

24 ¶These authors contributed equally to this work and should be considered joint first authors

25 &These authors contributed equally to this work and should be considered joint senior authors

26

27

**NOTE: This preprint reports new research that has not been certified by peer review and should not be used to guide clinical practice.**

## 28 Abstract

29 The individual and societal factors influencing long-term recreational exercise participation during the transition  
30 from adolescence to young adulthood are not well explored. We modelled latent longitudinal recreational exercise  
31 trajectories spanning 8 years from age 16 to 24, and examined demographic, socioeconomic, behavioural,  
32 academic, and psychological predictors at age 15 of trajectory-group membership. We also explored whether  
33 trajectories were associated with health, mental health, and educational achievement at age 25. Finite mixture  
34 modelling was conducted with population-based longitudinal cohort study data collected from 2006-2017 by the  
35 Longitudinal Survey of Australian Youth (LSAY). The study sample comprised 9,353 students (49% female)  
36 from 356 Australian schools. Self-reported recreational exercise frequency data were collected in 2007, 2008,  
37 2009, 2011, and 2014. Longitudinal latent trajectories of reported recreational exercise participation were  
38 estimated using group-based trajectory modelling for two scenarios: *daily/guideline-adherent* exercise versus *non-*  
39 *daily* exercise (model 1) and exercise *at least once weekly* versus exercise *less than once weekly* (model 2). Four  
40 distinct classes of long-term recreational exercise participation were identified for each model. Model 1:  
41 *guideline-adherent exercisers* (17.9% of the sample), *never guideline exercisers* (27.5%), *guideline drop-outs*  
42 (15.2%) and *towards guideline* (39.4%). Model 2: *regular weekly* (69.5% of the sample), *decreasing* (17.4%),  
43 *increasing* (4.8%), and *infrequent* (8.3%). In both models, predictors at age 15 for lower long-term exercise  
44 participation included female gender, lower self-efficacy, sport participation and parental socioeconomic status,  
45 and higher screen-time and academic literacy. At age 25, people in the *guideline-adherent exerciser* trajectory  
46 (model 1) reported better general health, whereas people in the *regular weekly* trajectory (model 2) had better  
47 general health and reduced rates of psychological distress, were happier with life and were more optimistic for  
48 the future relative to participants from other trajectory groups. Interventions and health-promotion activities to  
49 support sustained engagement in recreational exercise should particularly address the needs of females, people  
50 with low self-efficacy, reluctant exercisers, higher academic achievers, and youth experiencing socioeconomic  
51 disadvantage.

## 52 1. Introduction

53 The transition from adolescence to young adulthood is a critical time for the establishment of behaviours that  
54 influence health and wellbeing across the life span. Many chronic mental and physical health conditions manifest  
55 for the first time during this stage, including depression, premature diabetes, and cardiovascular disease [1-3].  
56 Promoting positive health behaviours in young people can have benefits during youth, reduce the burden of disease

57 in adulthood, and indirectly improve health in the next generation of children [4]. While population-level  
58 interventions for young people may powerfully impact social and economic outcomes [5], data about the  
59 development of health behaviours in 15 to 25-year-olds remain relatively sparse, prompting calls for global  
60 initiatives to improve behavioural health research in this age group [4, 6-8].

61 Physical exercise can confer long-term physical- and mental health benefits. In cross-sectional studies of adult  
62 populations, positive associations between exercise and cardiometabolic health, mental health, and quality of life  
63 have been reported [9, 10]. Similarly, in young people, cross-sectional studies have shown that physical exercise  
64 is associated with reduced risk for psychological distress [11], and with higher levels of bone health [12], self-  
65 esteem [11], flourishing [13], and health-related quality of life [14]. While some studies have demonstrated  
66 beneficial effects of cross-sectionally assessed exercise in youth on later adult outcomes [15, 16], distinct exercise  
67 *trajectories* during the transition from adolescence to young adulthood have received little attention [17]. Group-  
68 based trajectory modelling (GBTM) allows exploration of heterogeneity in behavioural trends over time by  
69 identifying distinct subgroups within a population. Predictors of latent group membership can be examined, and  
70 latent group membership itself may be used in turn to explain differences in particular outcomes. By identifying  
71 predictive factors for particular trajectory groups in the population, these approaches have the potential to inform  
72 health- and educational policies and aid in the targeting of preventive measures in high risk populations [18].

73 In the current study we applied GBTM to a large population sample to describe distinct patterns of recreational  
74 exercise undertaken outside of school or work, from the ages of 16 to 24. We then explored whether demographic,  
75 socioeconomic, behavioural, academic, and psychological factors measured at age 15 were predictive of the latent  
76 exercise trajectories describing longitudinal recreational exercise patterns, and whether trajectory group  
77 membership were associated with health, mental health, and educational achievement reported at age 25.

## 78 **2. Materials and methods**

### 79 **2.1 Data source and participants**

80 The Longitudinal Survey of Australian Youth (LSAY) [19] is managed by the Australian Council for Educational  
81 Research (ACER) and the Commonwealth Department of Education, Science and Training (DEST). The survey  
82 is designed to provide policy-relevant information about youth transition from school to work. Data were collected  
83 annually from 2006 at age 15 until participants turn 24 and were deposited within the Australian Data Archive  
84 (ADA) at the Australian National University. The study is jointly managed by the Australian Government

85 Department of Education, Skills and Employment and the National Centre for Vocational Education Research  
86 (NCVER) and adheres to informed consent guidelines set by the National Health and Medical Research Council's  
87 National Statement on the Ethical Conduct of Human Research, including written parental consent at time of  
88 enrolment of minors. Ethics approval for the LSAY survey was granted by the Australian Institute of Family  
89 Studies Ethics Committee [20]. The LSAY data are publicly available after an online registration and application  
90 process ([www.ada.edu.au/](http://www.ada.edu.au/)). Approval was granted by The Australian Data Archive for controlled access to the  
91 LSAY 2015 cohort data (Version 1.0), and subsequently deidentified, non-reidentifiable data were available for  
92 analysis.

93 Data were selected from the 2006 LSAY cohort which recruited 14,170 students, at the age of 15, from 356  
94 Australian schools involved in the Program for International Student Assessment (PISA). Participants were first  
95 assessed in 2006, followed up in 2007 by telephone, and then interviewed annually by computer assisted telephone  
96 interviews. From 2012, participants responded via an online portal until the completion of the survey in 2016.

97 Recreational exercise engagement was self-reported in 2007, 2008, 2009, 2011, and 2014 [19]. Longitudinal  
98 modelling was based on 9,535 participants with exercise data available. Health, mental health, and vocational  
99 outcomes were recorded in wave 10 in 2016, when participants were aged between 25 and 26 years [19].

100 We specified all exposure-, predictor-, and outcome variables *a priori*, based on literature review. Recreational  
101 exercise engagement was measured on a 7-point Likert-type scale, in response to the survey question "Outside  
102 study or work, how often do you play sport or do regular exercise?" (1 = every day, 2 = at least once a week (but  
103 not every day), 3 = at least once a month but less than once a week, 4 = at least once every 3 months but less often  
104 than once a month, 5 = at least once a year but less often than once every 3 months, 6 = less often than once a  
105 year, 7 = Never)[19]. Given the intervals between response categories were unequal, we derived two binary  
106 variables describing differential exercise participation, which were used in subsequent group-based trajectory  
107 modelling. The first definition defined exercise participation according to adherence to international guidelines  
108 [21], with categories of daily exercise ('guideline-adherent' exercise) and non-daily exercise (all other response  
109 categories; 'non-guideline'), while the second definition differentiated between low levels of exercise  
110 participation (any response describing less than once-weekly participation; 'infrequent' exercise) and more regular  
111 engagement (including response categories of every day and at least once a week; 'regular weekly' exercise).

112 For both definitions, variables assessed for their association with latent trajectory groups were those previously  
 113 found to be associated with exercise participation in adolescents, and included age, gender, socio-economic status  
 114 (maternal and paternal International Socio-Economic Index of Occupational Status (ISEI)), indices of self-worth  
 115 and self-efficacy, ethnicity (Aboriginal or Torres Strait Islander (ATSI)), attitudes towards sport, time spent  
 116 playing sport, time spent watching television, academic literacy, and students interest in school [19, 22-26].  
 117 Students' enjoyment of school was also included [19]. Candidate predictors were assessed in 2006 at age 15/16,  
 118 prior to the initial period of the exercise trajectories (see Table 1).

119 [Insert Table 1 about here]

120 **Table 1. Candidate predictor variables for trajectory group membership.**

| <b>Risk factor</b>                                                        | <b>LSAY item</b>                                                                                   | <b>Year measured</b> | <b>Unit/values (range)</b>                                  | <b>Proportion of data missing<br/>(as % of N=9353)</b> |
|---------------------------------------------------------------------------|----------------------------------------------------------------------------------------------------|----------------------|-------------------------------------------------------------|--------------------------------------------------------|
| Sex                                                                       | Gender                                                                                             | 2006                 | (1) Male<br>(2) Female                                      | 0 (no missing data)                                    |
| International Socio-Economic Index of Occupational Status (proxy for SES) | Father's ISES score                                                                                | 2006                 | 1-100                                                       | 7.45%                                                  |
|                                                                           | Mother's ISES score                                                                                | 2006                 | 1-100                                                       | 11.1%                                                  |
| Self-efficacy                                                             | "Compared with most students in your year level, how well are you doing in your subjects overall?" | 2006                 | (1) Below average<br>(2) About average<br>(3) Above average | 0.77%                                                  |
| Self-worth                                                                | "My school is a place where I know I can do well enough to be successful"                          | 2006                 | (1) Agree<br>(2) Disagree                                   | 0.71%                                                  |
|                                                                           | "I am a success as a student"                                                                      | 2006                 | (1) Agree<br>(2) Disagree                                   | 1.28%                                                  |

|                      |                                                                                       |      |                                      |                     |
|----------------------|---------------------------------------------------------------------------------------|------|--------------------------------------|---------------------|
|                      | “My school is a place where teachers give me marks I deserve”                         | 2006 | (1) Agree<br>(2) Disagree            | 0.97%               |
| Ethnicity            | ATSI-status                                                                           | 2006 | (1) Indigenous<br>(2) Non-indigenous | 0 (no missing data) |
| Sports participation | On average, how many hours per week do you spend playing sport?                       | 2006 | minutes per week                     | 2.11%               |
| Screen time: TV      | On average, how many hours do you spend each week on watching TV?                     | 2006 | minutes per week                     | 1.85%               |
| Enjoyment of school  | My school is a place where I get enjoyment from being here                            | 2006 | (1) Agree<br>(2) Disagree            | 0.92%               |
| Academic aptitude    | Plausible value in maths                                                              | 2006 | 670-3950                             | 0 (no missing data) |
|                      | Plausible value in reading                                                            | 2006 | 670-3950                             | 0 (no missing data) |
|                      | Plausible value in science                                                            | 2006 | 670-3950                             | 0 (no missing data) |
|                      | Academic literacy (sum of maths, reading and science scores)                          | 2006 | 2010-11850                           | 0 (no missing data) |
| Work at school       | My school is a place where: I am given the chance to do work that really interests me | 2006 | (1) Agree<br>(2) Disagree            | 0.74%               |

121 Note: Maximum plausible upper limits were imposed for sports participation (responses >40 hours/week  
122 excluded, n=91) and TV time (responses > 74 hours/week excluded n=42).

123

124 Several self-reported indicators of mental health, physical health, and vocational attainment were measured in  
125 2016 (at age 25). These included the Kessler-6 psychological distress score (K6), a validated measure widely  
126 used as an index of mental health in Australian population-based studies where comprehensive assessments are  
127 not feasible [19, 27]. Other measures taken at this timepoint included a single item from the SF-36 to qualify  
128 general health (“How would you say your health is?”) [19, 28], and items regarding on satisfaction with life and

129 view of one’s future, completion of high school, completion of a post school qualification, and participation in  
 130 the labour force [19] (see Table 2). K6 scores were dichotomised into either 0 = lower risk of mental illness  
 131 (scores from 6 – 18) or 1 = greater risk of mental illness (scores > 19) [29]. Predictor variables of exercise  
 132 trajectory groups were included in outcome analyses to control for potential confounding.

133 [Insert Table 2 about here]

134 **Table 2. Outcome variables assessed at age 25.**

| Outcome                                 | LSAY item                                                       | Year measured | Unit/values (range)                                                                                     |
|-----------------------------------------|-----------------------------------------------------------------|---------------|---------------------------------------------------------------------------------------------------------|
| General health                          | “In general, how would you say your health is?”<br>(from SF-36) | 2016          | (1) excellent<br>(2) very good<br>(3) fair<br>(4) poor                                                  |
| Greater risk of mental illness          | Kessler-6 (K6) questionnaire                                    | 2016          | (1) lower risk of mental illness (score of 8-18)<br>(2) greater risk of mental illness (score of 19-30) |
| Life satisfaction                       | “How happy are you with your life as a whole?”                  | 2016          | (1) very happy or happy<br>(2) unhappy or very unhappy                                                  |
| View of one’s future                    | “How happy are you with your future?”                           | 2016          | (1) very happy or happy<br>(2) unhappy or very unhappy                                                  |
| Completion of high school               | Completed Year 12 or Certificate II or higher                   | 2016          | (1) Year 12 completed<br>(2) Year 12 not completed                                                      |
| Completion of post-school qualification | Completed any post-school qualification                         | 2016          | (1) Qualification completed<br>(2) Qualification not completed                                          |
| Participation in the labour force       | Derived variable                                                | 2016          | (1) Participating in labour force (employed)<br>(2) Not participating in labour force (unemployed)      |

135

136

## 137 **2.2 Statistical methods**

138 We applied group-based trajectory modelling (GBTM) to the two dichotomised exercise-frequency variables  
139 described above to explore exercise behaviour over time (*model 1: daily exercise/guideline vs less than daily/non-*  
140 *guideline; model 2: at least 1x per week/regular weekly vs less than 1x per week/infrequent*). GBTM is a  
141 specialised application of finite mixture modelling that identifies distinct subgroups of individuals who follow  
142 similar trajectories of a repeatedly-measured behaviour [30]. Each trajectory is described as a polynomial function  
143 of time or age. To determine the optimal number of trajectory groups suggested by the observed data, and their  
144 shape (polynomial-order), a series of models with 1 to 4 groups of varying polynomial order were implemented  
145 using the *traj* add-on for Stata [31], separately for each definition of exercise engagement. A Bernoulli distribution  
146 was assumed since the exercise behaviour measures were binary. In the absence of any *a priori* hypotheses  
147 surrounding the number and shape of trajectory groups, for each measure we considered all possible models of  
148 group size ranging from one to four, and all possible combinations of zero-order (a constant), linear and quadratic  
149 polynomials for the trajectory shapes. Models with trajectory groups containing less than 1% of the sample were  
150 excluded, and the final models were selected based on goodness of fit as assessed using the Bayesian Information  
151 Criteria (BIC). The *traj* add-on uses full information maximum likelihood to handle missing data, such that  
152 parameters will be asymptotically unbiased under an assumption that missingness is not related to the unobserved  
153 outcomes (i.e. trajectory group assignment) [32]. There was little evidence against the null hypothesis that the  
154 exercise data were Missing Completely At Random (MCAR) from Little's test ( $\chi_{(33)}^2=20.2$ ,  $p=0.961$ ), such that  
155 the assumption that attrition is independent of trajectory group is reasonable.

156 For each of the two final models, participants were then assigned to the trajectory group for which they had the  
157 highest probability for membership, and the pre-specified baseline factors were investigated for their association  
158 with trajectory group membership post-hoc using multinomial logistic regression. All predictor variables had low  
159 amounts of missing data (<5%).

160 Associations between the identified trajectory groups in each of the two final models and longer-term outcomes  
161 were assessed using logistic regression (categorical outcomes), and linear regression (continuous outcomes),  
162 adjusted for potential confounders (gender, indigeneity, student socio-economic status (SSES), father ISEI, self-  
163 efficacy, academic achievement, and sport participation, TV time, and enjoyment of school at baseline in 2006)  
164 [19]. Standard errors were adjusted to account for clustering of participants by school. Goodness of fit was  
165 evaluated using the Hosmer-Lemeshow test for logistic regression models, and by visual inspection of residual



166 plots for normality and homoscedasticity for linear regression models. All analyses were conducted in Stata  
167 (version 15 StataCorp Texas) including use of the ‘traj’ add-on[31]. The level of statistical significance was set to  
168 0.05.

### 169 **3. Results**

#### 170 **3.1 Group Based Trajectory Modelling identified four distinct** 171 **patterns of recreational exercise participation over the 8-year** 172 **period from the age of 16 to 24**

173 Exercise Trajectory Model 1 evaluated the binary variable *guideline* vs *non-guideline* exercisers. Proportions of  
174 young people falling into these categories at each assessment time point are shown in S1 Fig. The final trajectory  
175 model 1, as determined by the Bayesian information criterion (BIC), was a four-group model, with groups of  
176 polynomial order 0, 0, 2 and 2, respectively (Fig 1). All trajectory subgroups included more than 1% of the sample.  
177 The two groups showing stable probabilities of exercise over time were labelled *guideline* (a high probability of  
178 daily exercise over time; 17.9% of the sample) and *never guideline* (low probability of daily exercise; 27.5% of  
179 the sample). The two groups with changes in probability over time were labelled *guideline drop-outs* (15.2% of  
180 the sample) and *towards guideline* (39.4% of the sample).

181 Exercise Trajectory Model 2 used the binary variable *infrequent* vs *regular weekly* exercisers. Proportions of  
182 young people falling into these categories at each assessment time point are shown in S2 Fig. As determined by  
183 the BIC, model 2 was also a four-group model, with groups of polynomial order 0, 0, 2 and 2, respectively (Fig  
184 2). All exercise trajectory subgroups included more than 1% of the sample. We labelled the two stable groups  
185 *infrequent* exercisers (with high probability of very little exercise over time, 8.3% of the sample) and *regular*  
186 *weekly* exercisers (69.5% of the sample). The two groups showing change in behaviour over time were labelled  
187 *declining-exercisers* (17.4%), and *increasing-exercisers* (4.8%), respectively.

188 [Insert Figs 1 and 2 about here]

#### 189 **Legend Figs 1 and 2. Models for 8-year physical exercise trajectories from age 16 to 24.**

190 **1): Exercise Trajectory Model 1.** Of the 9,353 young people included in the model, 17.9 % had a high probability  
191 of consistently meeting the WHO guideline recommendation of daily exercise, over 8 years (*guideline*, black line).  
192 27.5% were unlikely to ever meet recommendations (*never guideline*, dark red line). 15.2% of the sample were  
193 initially meeting daily exercise requirements but dropped out over time (*guideline drop-outs*, grey line). 39.4% of  
194 young people had a low initial probability of meeting guideline requirements but were more likely as time  
195 progressed (*towards guideline*, blue line).

196 **2) Exercise Trajectory Model 2.** 8.3% of young people had a persistently low probability of meaningful  
197 recreational physical exercise engagement, reporting less than one occasion per week (*infrequent*, red line). In  
198 contrast, 69.5% had a high probability of engaging consistently in more regular exercise (*regular weekly*, green  
199 line). 17.4% of the sample had an initially high probability of regular exercise that declined over time (*decreasing*  
200 *exerciser*, yellow line). 4.8% had a modest initial probability of regular exercise that increased from age 17  
201 (*increasing-exerciser*, blue line).

202

203

## 204 **3.2 Predictors at age 15 for long-term adherence to exercise** 205 **guidelines (daily exercise)**

206 Predictors for long-term adherence to daily exercise were those factors that reduced the risk of membership in a  
207 non-guideline trajectory group (reported as the adjusted Relative Risk Ratio (aRRR) for membership to a non-  
208 guideline group vs the guideline-adherent group, 95% CI; p). More time playing sport was a strong predictor of  
209 long-term maintenance of daily exercise: aRRR for each hour playing sport per week for *never guideline* vs  
210 *guideline*=0.86, 95% CI 0.84, 0.87; p<.0001; for *guideline dropout* vs *guideline* =0.98, 95% CI 0.97, 0.99; p<0.01;  
211 for *towards guideline* vs *guideline*=0.91 95% CI 0.90, 0.92; p<0.001 (Figs 3 - 5, Table 3).

212 Conversely, factors that increased risk of membership in a non-guideline exercise trajectory group (reported as  
213 aRRR for membership to a non-guideline vs guideline-adherent group, 95% CI; p) were: female gender: aRRR  
214 for *never guideline* vs *guideline* =1.76, 95% CI 1.53, 2.02; p<.0001; for *towards guideline* vs *guideline* =1.61,  
215 95% CI 1.41, 1.84; p=0.001), lower academic self-efficacy (relative to higher self-efficacy): aRRR for *never*  
216 *guideline* vs *guideline* =1.20, 95% CI 1.02, 1.39; p=0.025; for *towards guideline* vs *guideline* =1.25, 95% CI 1.09,  
217 1.43; p<0.001), greater academic literacy: aRRR per 1000 point increase for *never guideline* vs *guideline* =1.32,  
218 95% CI 1.24, 1.40; p<0.001; *guideline dropout* vs *guideline* =1.17, 95% CI 1.06, 1.30; p=0. and more time  
219 watching TV: aRRR per 5 hour increase per week for *never guideline* vs *guideline*=1.14, 95% CI 1.09, 1.20;  
220 p<.0001; *towards guideline* vs *guideline* =1.10 95% CI 1.05, 1.15; p<0.001) (Figs 3 - 5, Tables 3 and 4).

221

222 [Insert Figs 3, 4, and 5 about here]

223 **Legend Figs 3 - 5. Predictors at age 15 for long-term recreational physical exercise participation between**  
224 **the ages of 16 and 24.** Predictors for guideline-adherent (=daily) exercise. Predictors are shown as adjusted  
225 Relative Risk Ratios (aRRRs) for falling into the *never guideline* exerciser trajectory (Fig 3), the *towards guideline*  
226 trajectory (Fig 4) and the *guideline drop-out* trajectory (Fig 5), compared to the risk of following the *guideline*  
227 exercise trajectory.

228

229 [Insert Table 3 about here]

230 **Table 3. Summary statistics for continuous predictors for model 1 trajectory groups.**

| Characteristic | Assigned Trajectory Group |
|----------------|---------------------------|
|----------------|---------------------------|

|                                                                           | Guideline-adherent<br>(n=1948) | Never guideline<br>(n=3176) | Guideline drop-out<br>(n=612) | Towards guideline<br>(n=3617) |
|---------------------------------------------------------------------------|--------------------------------|-----------------------------|-------------------------------|-------------------------------|
| <b>International Socio-Economic Index of Occupational Status (ISEI)</b>   |                                |                             |                               |                               |
| Father's ISEI score (mean ± SD)                                           | 51.7 ± 22.0                    | 50.8 ± 21.5                 | 52.2 ± 21.1                   | 50.9 ± 22.3                   |
| Mother's ISEI score (mean ± SD)                                           | 53.5 ± 21.6                    | 53.0 ± 21.8                 | 54.4 ± 21.4                   | 53.7 ± 22.5                   |
| <b>Time spent each week playing sport (hours) at baseline</b> (mean ± SD) | 9.0 ± 6.9                      | 4.5 ± 4.2                   | 8.0 ± 6.1                     | 5.6 ± 5.3                     |
| <b>Time spent each week watching TV (hours) at baseline</b> (mean ± SD)   | 10.3 ± 8.9                     | 10.8 ± 9.2                  | 10.5 ± 9.0                    | 10.9 ± 9.2                    |
| <b>Academic literacy at baseline</b> (mean ± SD)                          |                                |                             |                               |                               |
| Plausible value in maths, science and reading combined                    | 7870 ± 1243                    | 8199 ± 1220                 | 8156 ± 1200                   | 7841 ± 1250                   |

231  
232

233 [Insert Table 4 about here]

234

235 **Table 4. Summary statistics for binary and categorical predictors for model 1 trajectory groups.** Percentages  
236 may not equal 100 due to rounding.

| Characteristic           | Assigned Trajectory Group <sup>^</sup> |                             |                               |                               |
|--------------------------|----------------------------------------|-----------------------------|-------------------------------|-------------------------------|
|                          | Guideline-adherent<br>(n=1948)         | Never guideline<br>(n=3176) | Guideline drop-out<br>(n=612) | Towards guideline<br>(n=3617) |
|                          | Freq (%)                               | Freq (%)                    | Freq (%)                      | Freq (%)                      |
| <b>Gender</b>            |                                        |                             |                               |                               |
| Male                     | 1187 (60.9)                            | 1289 (40.6)                 | 369 (60.3)                    | 1616 (44.7)                   |
| Female                   | 761 (39.1)                             | 1887 (59.4)                 | 243 (39.7)                    | 2001 (55.3)                   |
| <b>Indigenous Status</b> |                                        |                             |                               |                               |

| Characteristic                                                                                            | Assigned Trajectory Group <sup>^</sup> |        |                             |        |                               |        |                               |        |
|-----------------------------------------------------------------------------------------------------------|----------------------------------------|--------|-----------------------------|--------|-------------------------------|--------|-------------------------------|--------|
|                                                                                                           | Guideline-adherent<br>(n=1948)         |        | Never guideline<br>(n=3176) |        | Guideline drop-out<br>(n=612) |        | Towards guideline<br>(n=3617) |        |
|                                                                                                           | Freq                                   | (%)    | Freq                        | (%)    | Freq                          | (%)    | Freq                          | (%)    |
| Non-indigenous                                                                                            | 1824                                   | (93.6) | 3036                        | (95.6) | 583                           | (95.3) | 3392                          | (93.8) |
| Indigenous                                                                                                | 124                                    | (6.4)  | 140                         | (4.4)  | 29                            | (4.7)  | 225                           | (6.2)  |
| <b>Self-efficacy</b>                                                                                      |                                        |        |                             |        |                               |        |                               |        |
| <i>“Compared with most students in your year level, how well are you doing in your subjects overall?”</i> |                                        |        |                             |        |                               |        |                               |        |
| Below average                                                                                             | 71                                     | (3.6)  | 130                         | (4.1)  | 17                            | (2.8)  | 183                           | (5.1)  |
| About average                                                                                             | 747                                    | (38.4) | 1300                        | (40.9) | 209                           | (34.2) | 1639                          | (45.3) |
| Above average                                                                                             | 1113                                   | (57.1) | 1721                        | (54.2) | 384                           | (62.8) | 1767                          | (48.9) |
| Missing/unknown                                                                                           | 17                                     | (0.9)  | 25                          | (0.8)  | 2                             | (0.33) | 28                            | (0.77) |
| <b>Self-worth</b>                                                                                         |                                        |        |                             |        |                               |        |                               |        |
| <i>“My school is a place where I know I can do well enough to be successful”</i>                          |                                        |        |                             |        |                               |        |                               |        |
| Agree                                                                                                     | 1834                                   | (94.2) | 2972                        | (93.6) | 578                           | (94.4) | 3324                          | (91.9) |
| Disagree                                                                                                  | 97                                     | (5.0)  | 184                         | (5.8)  | 34                            | (5.6)  | 264                           | (7.3)  |
| Missing/unknown                                                                                           | 17                                     | (0.9)  | 20                          | (0.6)  | 0                             | (0)    | 29                            | (0.8)  |
| <i>“I am a success as a student”</i>                                                                      |                                        |        |                             |        |                               |        |                               |        |
| Agree                                                                                                     | 1684                                   | (86.5) | 2692                        | (84.8) | 528                           | (86.3) | 2985                          | (82.5) |
| Disagree                                                                                                  | 236                                    | (12.1) | 449                         | (14.1) | 77                            | (12.6) | 582                           | (16.1) |
| Missing/unknown                                                                                           | 28                                     | (1.4)  | 35                          | (1.1)  | 7                             | (1.1)  | 50                            | (1.4)  |
| <i>“My school is a place where teachers give me marks I deserve”</i>                                      |                                        |        |                             |        |                               |        |                               |        |
| Agree                                                                                                     | 1592                                   | (81.7) | 2714                        | (85.5) | 515                           | (84.2) | 2941                          | (81.3) |

| Characteristic                                                      | Assigned Trajectory Group <sup>^</sup> |        |                             |        |                               |        |                               |        |
|---------------------------------------------------------------------|----------------------------------------|--------|-----------------------------|--------|-------------------------------|--------|-------------------------------|--------|
|                                                                     | Guideline-adherent<br>(n=1948)         |        | Never guideline<br>(n=3176) |        | Guideline drop-out<br>(n=612) |        | Towards guideline<br>(n=3617) |        |
|                                                                     | Freq                                   | (%)    | Freq                        | (%)    | Freq                          | (%)    | Freq                          | (%)    |
| Disagree                                                            | 333                                    | (17.1) | 432                         | (13.6) | 95                            | (15.5) | 640                           | (17.7) |
| Missing/unknown                                                     | 23                                     | (1.2)  | 30                          | (0.9)  | 2                             | (0.3)  | 36                            | (1.0)  |
| <b>Enjoyment of school</b>                                          |                                        |        |                             |        |                               |        |                               |        |
| <i>“My school is a place where I get enjoyment from being here”</i> |                                        |        |                             |        |                               |        |                               |        |
| Agree                                                               | 1471                                   | (75.5) | 2341                        | (73.7) | 459                           | (75.0) | 2549                          | (70.5) |
| Disagree                                                            | 459                                    | (23.6) | 811                         | (25.5) | 150                           | (24.5) | 1027                          | (28.4) |
| Missing/unknown                                                     | 18                                     | (0.9)  | 24                          | (0.8)  | 3                             | (0.5)  | 41                            | (1.1)  |
| <i>“At school I am given the chance to do interesting work”</i>     |                                        |        |                             |        |                               |        |                               |        |
| Agree                                                               | 1453                                   | (74.6) | 2414                        | (76.0) | 478                           | (78.1) | 2607                          | (72.1) |
| Disagree                                                            | 479                                    | (24.6) | 743                         | (23.4) | 131                           | (21.4) | 979                           | (27.1) |
| Missing/unknown                                                     | 16                                     | (0.8)  | 19                          | (0.6)  | 3                             | (0.49) | 31                            | (0.9)  |

237

238

239

### 240 **3.3 Risk factors at age 15 for insufficient long-term recreational** 241 **exercise participation (less than once weekly)**

242 At age 15, the risk factors for membership in one of the three groups engaging in less exercise (infrequent  
243 exercisers, increasing exercisers, and declining exercisers) relative to the regular weekly group were as follows:  
244 female gender (aRRR for *infrequent exercisers* =1.55, 95% CI 1.30, 1.85; p<.0001 ; aRRR for *declining exercisers*  
245 =1.27, 95% CI 1.12, 1.43; p<.0001; aRRR for *increasing exercisers* =1.47, 95% CI 1.18, 1.83; p=0.001), increased  
246 TV time (for every 5 hours of TV per week, aRRR for *infrequent exercisers* =1.13, 95% CI 1.08, 1.18; p<.0001 ;  
247 aRRR for *declining exercisers* =1.06, 95% CI 1.02, 1.09; p=0.001; aRRR for *increasing exercisers* =1.11, 95%  
248 CI 1.05, 1.17; p<.0001), and average levels of academic self-efficacy (versus above-average self-efficacy) (aRRR

249 for *infrequent exercisers* =1.32, 95% CI 1.10, 1.18; p=0.003; aRRR for *declining exercisers* =1.18, 95% CI 1.03,  
250 1.35; p=0.016; aRRR for *increasing exercisers* =1.27, 95% CI 1.02, 1.58; p=0.035). Higher sports participation  
251 at age 15 decreased the risk of being in the lower exercise trajectories (for each hour spent playing sport per week,  
252 aRRR for *infrequent exercisers* =0.69, 95% CI 0.65, 0.73; p<.0001 ; aRRR for *declining exercisers* =0.91, 95%  
253 CI 0.90, 0.93; p<.0001; aRRR for *increasing exercisers* =0.81, 95% CI 0.77, 0.85; p<.0001) (Figs 6 – 8, Tables 5  
254 and 6).

255 Relative to the *regular weekly* exercise group, below average self-efficacy (versus above-average self-efficacy)  
256 was a risk factor for membership in *infrequent exercisers* and *declining-exerciser* groups (aRRR for *infrequent*  
257 *exercisers* =1.85, 95% CI 1.26, 2.72; p=0.002; aRRR for *declining exercisers* =1.45, 95% CI 1.07, 1.97; p=0.017)  
258 (Fig 3, A and B). Higher paternal ISEI was protective against membership in the *infrequent exercisers* and  
259 *declining-exerciser* groups (for every 10 units in ISEI score, aRRR for *infrequent exercisers*=0.92; 95% CI 0.88,  
260 0.97; p=0.001; aRRR for *declining exercisers* =0.95, 95% CI 0.92, 0.98; p=0.002) (Figs 6 - 8, Table 6).

261 Young people with higher academic literacy scores were more likely to fall into either the *decreasing exerciser*  
262 or *increasing exerciser* groups relative to the *regular weekly* exercise group (for every 1000 units, aRRR for  
263 *decreasing exerciser* =1.11; 95% CI 1.05, 1.18; p=0.001; aRRR for *increasing exerciser* =1.33, 95% CI 1.20,  
264 1.47; p<.0001) (Fig 2, b and c). Indigenous status, measures of self-worth, enjoyment of school, or interest in  
265 schoolwork were not found to be significantly associated with trajectory group (Figs 6 - 8, Tables 5 and 6).

266 [Insert Figs 6 – 8 about here]

267 **Legend Figs 6 - 8. Predictors at age 15 for long-term recreational physical exercise participation between**  
268 **the ages of 16 and 24.** Risks for insufficient (less than once weekly) recreational exercise (Model 2). Risks are  
269 shown as adjusted Relative Risk Ratios (aRRRs) for falling into the *infrequent exerciser* trajectory (Fig 6), the  
270 *decreasing exerciser* trajectory (Fig 7) and the *increasing exerciser* trajectory (Fig 8), compared to the risk of  
271 following the *regular weekly* exercise trajectory. ISEI: International Socio-Economic Index of Occupational  
272 Status.

273 [Insert Table 5 about here]

274 **Table 5. Summary statistics for continuous variables for model 2 trajectory groups.**

| Characteristic                                                            | Assigned Trajectory Group         |                              |                               |                              |
|---------------------------------------------------------------------------|-----------------------------------|------------------------------|-------------------------------|------------------------------|
|                                                                           | Regular weekly exerciser (n=6501) | Infrequent exerciser (n=778) | Decreasing exerciser (n=1626) | Increasing exerciser (n=448) |
| <b>International Socio-Economic Index of Occupational Status (ISEI)</b>   |                                   |                              |                               |                              |
| Father's ISEI score (mean ± SD)                                           | 47.9 ± 18.1                       | 43.8 ± 16.8                  | 46.5 ± 17.8                   | 47.3 ± 17.7                  |
| Mother's ISEI score (mean ± SD)                                           | 48.4 ± 16.0                       | 44.6 ± 15.9                  | 46.9 ± 16.8                   | 49.3 ± 16.5                  |
| <b>Time spent each week playing sport (hours) at baseline (mean ± SD)</b> | 7.0 ± 5.9                         | 2.4 ± 3.3                    | 4.8 ± 4.9                     | 3.5 ± 3.9                    |
| <b>Time spent each week watching TV (hours) at baseline (mean ± SD)</b>   | 10.6 ± 8.9                        | 11.7 ± 10.3                  | 10.8 ± 9.2                    | 11.0 ± 10.0                  |
| <b>Academic literacy at baseline (mean ± SD)</b>                          |                                   |                              |                               |                              |
| Plausible value in maths, science and reading combined                    | 7977 ± 1237                       | 7819 ± 1288                  | 8036 ± 1276                   | 8306 ± 1133                  |
| Characteristic                                                            | Assigned Trajectory Group         |                              |                               |                              |
|                                                                           | Regular weekly exerciser (n=6501) | Infrequent exerciser (n=778) | Decreasing exerciser (n=1626) | Increasing exerciser (n=448) |
| <b>International Socio-Economic Index of Occupational Status (ISEI)</b>   |                                   |                              |                               |                              |
| Father's ISEI score (mean ± SD)                                           | 47.9 ± 18.1                       | 43.8 ± 16.8                  | 46.5 ± 17.8                   | 47.3 ± 17.7                  |
| Mother's ISEI score (mean ± SD)                                           | 48.4 ± 16.0                       | 44.6 ± 15.9                  | 46.9 ± 16.8                   | 49.3 ± 16.5                  |
| <b>Time spent each week playing sport (hours) at baseline (mean ± SD)</b> | 7.0 ± 5.9                         | 2.4 ± 3.3                    | 4.8 ± 4.9                     | 3.5 ± 3.9                    |
| <b>Time spent each week watching TV (hours) at baseline (mean ± SD)</b>   | 10.6 ± 8.9                        | 11.7 ± 10.3                  | 10.8 ± 9.2                    | 11.0 ± 10.0                  |

|                                                        |             |             |             |             |
|--------------------------------------------------------|-------------|-------------|-------------|-------------|
| <b>baseline</b> (mean ± SD)                            |             |             |             |             |
| <b>Academic literacy at baseline</b> (mean ± SD)       |             |             |             |             |
| Plausible value in maths, science and reading combined | 7977 ± 1237 | 7819 ± 1288 | 8036 ± 1276 | 8306 ± 1133 |

275

276

277

278 [Insert Table 6 about here]

279

| Characteristic                                                                                            | Assigned Trajectory Group <sup>^</sup> |        |                                 |        |                                  |        |                                 |        |
|-----------------------------------------------------------------------------------------------------------|----------------------------------------|--------|---------------------------------|--------|----------------------------------|--------|---------------------------------|--------|
|                                                                                                           | Regular weekly exerciser<br>(n=6501)   |        | Infrequent exerciser<br>(n=778) |        | Decreasing exerciser<br>(n=1626) |        | Increasing exerciser<br>(n=448) |        |
|                                                                                                           | Freq                                   | (%)    | Freq                            | (%)    | Freq                             | (%)    | Freq                            | (%)    |
| <b>Gender</b>                                                                                             |                                        |        |                                 |        |                                  |        |                                 |        |
| Male                                                                                                      | 3372                                   | (51.9) | 244                             | (31.4) | 686                              | (42.2) | 159                             | (35.5) |
| Female                                                                                                    | 3129                                   | (48.1) | 534                             | (68.6) | 940                              | (57.8) | 289                             | (64.5) |
| <b>Indigenous Status</b>                                                                                  |                                        |        |                                 |        |                                  |        |                                 |        |
| Non-indigenous                                                                                            | 6141                                   | (94.5) | 723                             | (92.9) | 1540                             | (94.7) | 431                             | (96.2) |
| Indigenous                                                                                                | 360                                    | (5.5)  | 55                              | (7.1)  | 86                               | (5.3)  | 17                              | (3.8)  |
| <b>Self-efficacy</b>                                                                                      |                                        |        |                                 |        |                                  |        |                                 |        |
| <i>“Compared with most students in your year level, how well are you doing in your subjects overall?”</i> |                                        |        |                                 |        |                                  |        |                                 |        |
| Below average                                                                                             | 241                                    | (3.7)  | 57                              | (7.3)  | 79                               | (4.9)  | 24                              | (5.4)  |
| About average                                                                                             | 2605                                   | (40.1) | 390                             | (50.1) | 706                              | (43.4) | 194                             | (43.3) |

280 **Table 6. Summary statistics for binary and categorical predictors for model 2 trajectory groups.**

281 Percentages may not equal 100 due to rounding.

282



|                                            |      |        |     |        |      |        |     |        |
|--------------------------------------------|------|--------|-----|--------|------|--------|-----|--------|
| Above average                              | 3602 | (55.4) | 328 | (42.2) | 827  | (50.9) | 228 | (50.9) |
| Missing/unknown                            | 53   | (0.8)  | 3   | (0.4)  | 14   | (0.9)  | 2   | (0.4)  |
| <b>Self-worth</b>                          |      |        |     |        |      |        |     |        |
| <i>“My school is a place where I know</i>  |      |        |     |        |      |        |     |        |
| <i>I can do well enough to be</i>          |      |        |     |        |      |        |     |        |
| <i>successful”</i>                         |      |        |     |        |      |        |     |        |
| Agree                                      | 6108 | (94.0) | 702 | (90.2) | 1487 | (91.5) | 411 | (91.7) |
| Disagree                                   | 346  | (5.3)  | 74  | (9.5)  | 124  | (7.6)  | 35  | (7.8)  |
| Missing/unknown                            | 47   | (0.7)  | 2   | (0.3)  | 15   | (0.9)  | 2   | (0.5)  |
| <i>“I am a success as a student”</i>       |      |        |     |        |      |        |     |        |
| Agree                                      | 5586 | (85.9) | 608 | (78.2) | 1328 | (81.7) | 367 | (81.9) |
| Disagree                                   | 837  | (12.9) | 158 | (20.3) | 272  | (16.7) | 77  | (17.2) |
| Missing/unknown                            | 78   | (1.2)  | 12  | (1.5)  | 26   | (1.6)  | 4   | (0.9)  |
| <i>“My school is a place where</i>         |      |        |     |        |      |        |     |        |
| <i>teachers give me marks I deserve”</i>   |      |        |     |        |      |        |     |        |
| Agree                                      | 5426 | (83.5) | 615 | (79.1) | 1343 | (82.6) | 378 | (84.4) |
| Disagree                                   | 1008 | (15.5) | 158 | (20.3) | 267  | (16.4) | 67  | (15.0) |
| Missing/unknown                            | 67   | (1.0)  | 5   | (0.6)  | 16   | (1.0)  | 3   | (0.7)  |
| <b>Enjoyment of school</b>                 |      |        |     |        |      |        |     |        |
| <i>“My school is a place where I get</i>   |      |        |     |        |      |        |     |        |
| <i>enjoyment from being here”</i>          |      |        |     |        |      |        |     |        |
| Agree                                      | 4829 | (74.3) | 521 | (67.0) | 1142 | (70.2) | 328 | (73.2) |
| Disagree                                   | 1607 | (24.7) | 251 | (32.3) | 473  | (29.1) | 116 | (25.9) |
| Missing/unknown                            | 65   | (1.0)  | 6   | (0.8)  | 11   | (0.7)  | 4   | (0.9)  |
| <i>“At school I am given the chance to</i> |      |        |     |        |      |        |     |        |
| <i>do interesting work”</i>                |      |        |     |        |      |        |     |        |
| Agree                                      | 4885 | (75.1) | 531 | (68.3) | 1196 | (73.6) | 340 | (75.9) |
| Disagree                                   | 1566 | (24.1) | 244 | (31.4) | 418  | (25.7) | 104 | (23.2) |
| Missing/unknown                            | 50   | (0.8)  | 3   | (0.4)  | 12   | (0.7)  | 4   | (0.9)  |

284

285

286 **3.3 Young people who maintain daily recreational exercise**  
287 **between age 16 and 24 report better general health at age**  
288 **25 than those who don't exercise daily; no additional**  
289 **advantages on measured indicators of mental health and**  
290 **vocational attainment were identified.**

291 Guideline-adherent exerciser group membership was positively associated with self-reported general health at  
292 age 25, and this association remained after the adjustment for possible confounders of gender, ethnicity,  
293 participants' ISEI score, and the predictors of trajectory group membership.

294 Compared to the *guideline* exerciser group, the *never guideline*, *guideline dropouts*, and *towards guideline* groups  
295 had significantly higher odds of poorer self-reported general health (results reported as adjusted Odds Ratio (aOR)  
296 of lower vs higher self-reported general health, 95% CI; p); *guideline* vs *never guideline* =2.24, 95% CI 1.85,  
297 2.73; p<.0001; *guideline* vs *guideline dropouts* =1.91, 95% CI 1.45, 2.51; p<.0001; *guideline* vs *towards guideline*  
298 =1.56, 95% CI 1.29, 1.90; p<.0001)(Fig 9). There were no associations between trajectory groups (according to  
299 probability of daily exercise over time) and mental illness, life satisfaction at age 25 (happiness with the future or  
300 happiness with life overall), year 12 completion, the attainment of a post school qualification, or participation in  
301 the labour force (Figs 10 - 15).

302 [Insert Figs 9 - 15 about here]

303 **Legend Figs 9 - 15. Model 1 trajectory group associations with health-, mental health-, and educational**  
304 **outcomes at age 25.** Associations expressed as adjusted odds ratios (ORs) describing the odds of experiencing  
305 each outcome of interest for participants who undertake less than daily recreational physical exercise (the *never*  
306 *guideline*, *guideline dropouts*, and *towards guideline* exercise trajectories) vs participants undertaking the  
307 recommended level of recreational physical exercise (*guideline* exercisers). Less than *guideline* levels of  
308 recreational exercise had a) poorer self-reported general health (Fig 9). There were no associations between less  
309 than *guideline* levels of recreational exercise and Fig 10) mental illness Fig 11) overall satisfaction with life; Fig  
310 12) satisfaction with the future; Fig 13) completing high school year 12, or higher; Fig 14) attaining any post-  
311 school qualification; Fig 15) participation in the labour force.

312 [Insert table 7 about here]

313 **Table 7. Summary statistics of Model 1 trajectory group associations with outcomes at age 25.**

| Outcome                                               | Guideline-adherent |        | Never guideline |        | Guideline drop-out |        | Towards guideline |        |
|-------------------------------------------------------|--------------------|--------|-----------------|--------|--------------------|--------|-------------------|--------|
|                                                       | Freq               | (%)    | Freq            | (%)    | Freq               | (%)    | Freq              | (%)    |
| <b>Psychological distress</b>                         |                    |        |                 |        |                    |        |                   |        |
| <b>(Kessler-6)</b>                                    |                    |        |                 |        |                    |        |                   |        |
| Lower risk of mental illness                          | 543/567            | (95.8) | 1307/1420       | (92.0) | 267/288            | (92.7) | 939/1020          | (92.1) |
| Greater risk of mental illness                        | 24/567             | (4.2)  | 113/1420        | (8.0)  | 21/288             | (7.3)  | 81/1020           | (7.9)  |
| <b>Self-reported general health</b>                   |                    |        |                 |        |                    |        |                   |        |
| Excellent                                             | 169/574            | (29.4) | 184/1432        | (12.9) | 54/291             | (18.6) | 217/1030          | (21.1) |
| Very good                                             | 247/574            | (43.0) | 535/1432        | (37.4) | 110/291            | (37.8) | 367/1030          | (35.6) |
| Good                                                  | 115/574            | (20.0) | 503/1432        | (35.5) | 91/291             | (31.3) | 329/1030          | (31.9) |
| Fair                                                  | 30/574             | (5.2)  | 170/1432        | (11.9) | 31/291             | (10.7) | 96/1030           | (9.3)  |
| Poor                                                  | 13/574             | (2.3)  | 35/1432         | (2.4)  | 5/291              | (1.7)  | 21/1030           | (2.0)  |
| <b>Life satisfaction: happy with life as a whole</b>  |                    |        |                 |        |                    |        |                   |        |
| Happy                                                 | 553/573            | (96.5) | 1350/1416       | (95.3) | 270/287            | (94.1) | 969/1014          | (95.6) |
| Unhappy                                               | 20/573             | (3.5)  | 66/1416         | (4.7)  | 17/287             | (5.9)  | 45/1014           | (4.4)  |
| <b>Life satisfaction: happy with the future</b>       |                    |        |                 |        |                    |        |                   |        |
| Happy                                                 | 550/565            | (97.4) | 1315/1381       | (95.2) | 266/280            | (95.0) | 961/995           | (96.6) |
| Unhappy                                               | 15/565             | (2.7)  | 66/1381         | (4.8)  | 14/280             | (5.0)  | 34/995            | (3.4)  |
| <b>Completion of high school (Year 12 or Cert II)</b> |                    |        |                 |        |                    |        |                   |        |
| Completed Year 12/Cert II                             | 558/575            | (97.0) | 1391/1438       | (96.7) | 281/292            | (96.2) | 1004/1038         | (96.7) |
| Did not complete                                      | 17/575             | (3.0)  | 47/1438         | (3.3)  | 11/292             | (3.8)  | 34/1038           | (3.3)  |

| Outcome                                            | Guideline-adherent |        | Never guideline |        | Guideline drop-out |        | Towards guideline |        |
|----------------------------------------------------|--------------------|--------|-----------------|--------|--------------------|--------|-------------------|--------|
|                                                    | Freq               | (%)    | Freq            | (%)    | Freq               | (%)    | Freq              | (%)    |
| <b>Completion of any post-school qualification</b> |                    |        |                 |        |                    |        |                   |        |
| Yes                                                | 491/575            | (85.4) | 1247/1438       | (86.7) | 240/292            | (82.2) | 871/1038          | (83.9) |
| No                                                 | 84/575             | (14.6) | 191/1438        | (13.3) | 52/292             | (17.8) | 167/1038          | (16.1) |
| <b>Participation in the labour force</b>           |                    |        |                 |        |                    |        |                   |        |
| Employed                                           | 535/552            | (96.9) | 1302/1340       | (97.2) | 256/270            | (94.8) | 945/983           | (96.1) |
| Unemployed                                         | 17/552             | (3.1)  | 38/1340         | (2.8)  | 14/270             | (5.2)  | 38/983            | (3.9)  |

314

315

### 316 **3.4 Young people with insufficient levels of recreational exercise** 317 **between age 16 and 24 are at higher risk of adverse health- and** 318 **mental health- outcomes at age 25.**

319 Membership in less-than weekly exercise trajectory groups were negatively associated with measures of general  
320 health, psychological distress, and life satisfaction at age 25, and associations persisted after adjusting for the  
321 potentially confounding effects of gender, ethnicity, participants' ISEI score, and other identified predictor  
322 variables (Figs 16 - 19, Table 5). The associations between trajectory-group membership and the attainment of  
323 school- and post-school qualifications, and with participation in the labour force did not persist following  
324 adjustment. (Figs 20 - 22, Table 5).

325 Compared to the *regular weekly* exercise group, *infrequent exercisers*, *declining exercisers*, and *increasing-*  
326 *exercisers* had significantly higher odds of poorer self-reported general health (results reported as adjusted Odds  
327 Ratio (aOR), 95% CI; p); for *infrequent exercisers* =2.57, 95% CI 2.02, 3.28; p<.0001; for *declining exercisers*  
328 =1.97, 95% CI 1.66, 2.34; p<.0001; aOR for *increasing exercisers* =1.81, 95% CI 1.46, 2.24; p<.0001)(Fig 16),  
329 and had higher odds of elevated K6 scores suggesting probable mental illness (aOR for *infrequent*  
330 *exercisers*=2.42, 95% CI 1.55, 3.78; p<.0001; aOR for *declining exercisers* =2.19, 95% CI 1.64, 2.93; p<.0001;  
331 aOR for *increasing exercisers* =1.59, 95% CI 1.03, 2.47; p=0.036)(Fig 17). Young people in the *infrequent*  
332 *exercisers*, *declining exercisers*, and *increasing exercisers* groups were less likely to feel happy about the future;  
333 aOR for *infrequent exercisers* =0.25, 95% CI 0.15, 0.42; p<.0001; aOR for *declining exercisers* =0.51, 95% CI

334 0.33, 0.79; p=0.002; aOR for *increasing exercisers* =0.54, 95% CI 0.30, 0.97; p=0.041)(Fig 18), and the *infrequent*  
 335 *exercisers* and *declining exercisers* groups were less likely to be satisfied with life overall (aOR for *infrequent*  
 336 *exercisers* =0.33, 95% CI 0.20, 0.54; p<.0001; adjusted OR for *declining exercisers* =0.57, 95% CI 0.39, 0.84;  
 337 p=0.004)(Fig 19).

338 For health-, mental health-, and life satisfaction measures we observed stepped decreases in the odds of adverse  
 339 outcomes, with the *infrequent exercisers* group experiencing the highest disadvantage relative to *regular weekly*  
 340 *exercise*, followed by *declining exercisers* and *increasing exercisers* (Figs 16 - 19). There is small variability in  
 341 the total n available for each variable due to incomplete data (n range 3145-3343).

342 [Insert Figs 16 – 22 about here]

343 **Legend Figs 16 - 22. Model 2 trajectory group associations with health-, mental health-, and educational**  
 344 **outcomes at age 25.** Associations expressed as adjusted odds ratios (aORs) describing the odds of experiencing  
 345 each outcome of interest for participants who undertake lower levels of recreational physical exercise  
 346 (infrequent exercisers, decreasing exercisers, increasing exercisers) vs participants undertaking a higher level of  
 347 recreational physical exercise (regular weekly exercisers). Outcomes are Fig 16) poorer general health; Fig 17)  
 348 mental illness Fig 18) overall satisfaction with the future; Fig 19) overall satisfaction with life; Fig 20)  
 349 completing high school year 12, or higher; Fig 21) attaining any post-school qualification; Fig 22) participation  
 350 in the labour force.

351 [Insert Table 8 about here]

352 **Table 8. Summary statistics of Model 2 trajectory group associations with outcomes at age 25.**

| Outcome                             | Regular weekly exerciser |        | Infrequent exerciser |        | Decreasing exerciser |        | Increasing exerciser |        |
|-------------------------------------|--------------------------|--------|----------------------|--------|----------------------|--------|----------------------|--------|
|                                     | Freq                     | (%)    | Freq                 | (%)    | Freq                 | (%)    | Freq                 | (%)    |
| <b>Psychological distress</b>       |                          |        |                      |        |                      |        |                      |        |
| <b>(Kessler-6)</b>                  |                          |        |                      |        |                      |        |                      |        |
| Lower risk of mental illness        | 1900/2003                | (94.9) | 231/263              | (87.8) | 641/719              | (89.2) | 284/310              | (91.6) |
| Greater risk of mental illness      | 103/2003                 | (5.1)  | 32/263               | (12.2) | 78/719               | (10.8) | 26/310               | (8.4)  |
| <b>Self-reported general health</b> |                          |        |                      |        |                      |        |                      |        |
| Excellent                           | 465/2021                 | (23.0) | 27/267               | (10.1) | 96/725               | (13.2) | 36/314               | (11.5) |

| Outcome                                               | Regular weekly exerciser |        | Infrequent exerciser |        | Decreasing exerciser |        | Increasing exerciser |        |
|-------------------------------------------------------|--------------------------|--------|----------------------|--------|----------------------|--------|----------------------|--------|
|                                                       | Freq                     | (%)    | Freq                 | (%)    | Freq                 | (%)    | Freq                 | (%)    |
| Very good                                             | 813/2021                 | (40.2) | 84/267               | (31.5) | 247/725              | (34.1) | 115/314              | (36.6) |
| Good                                                  | 570/2021                 | (28.2) | 95/267               | (35.6) | 256/725              | (35.3) | 122/314              | (38.9) |
| Fair                                                  | 134/2021                 | (6.6)  | 49/267               | (18.4) | 108/725              | (14.9) | 36/314               | (11.5) |
| Poor                                                  | 39/2021                  | (1.9)  | 12/267               | (4.5)  | 18/725               | (2.5)  | 5/314                | (1.6)  |
| <b>Life satisfaction: happy with life as a whole</b>  |                          |        |                      |        |                      |        |                      |        |
| Happy                                                 | 1938/2007                | (96.6) | 238/263              | (90.5) | 668/709              | (94.2) | 298/311              | (95.8) |
| Unhappy                                               | 69/2007                  | (3.4)  | 25/263               | (9.5)  | 41/709               | (5.8)  | 13/311               | (4.2)  |
| <b>Life satisfaction: happy with the future</b>       |                          |        |                      |        |                      |        |                      |        |
| Happy                                                 | 1923/1978                | (97.2) | 228/252              | (90.5) | 653/689              | (94.8) | 288/302              | (95.4) |
| Unhappy                                               | 55/1978                  | (2.8)  | 24/252               | (9.5)  | 36/689               | (5.2)  | 14/302               | (4.6)  |
| <b>Completion of high school (Year 12 or Cert II)</b> |                          |        |                      |        |                      |        |                      |        |
| Completed Year 12/Cert II                             | 1978/2028                | (97.5) | 254/268              | (94.8) | 706/731              | (96.6) | 296/316              | (93.7) |
| Did not complete                                      | 50/2028                  | (2.5)  | 14/268               | (5.2)  | 25/731               | (3.4)  | 20/316               | (6.3)  |
| <b>Completion of any post-school qualification</b>    |                          |        |                      |        |                      |        |                      |        |
| Yes                                                   | 1741/2028                | (85.8) | 215/268              | (80.2) | 629/731              | (86.1) | 264/316              | (83.5) |
| No                                                    | 287/2028                 | (14.2) | 53/268               | (19.8) | 102/731              | (13.9) | 52/316               | (16.5) |
| <b>Participation in the labour force</b>              |                          |        |                      |        |                      |        |                      |        |
| Employed                                              | 1872/1927                | (97.2) | 233/242              | (96.3) | 652/686              | (95.0) | 281/290              | (96.9) |
| Unemployed                                            | 55/1927                  | (2.8)  | 9/242                | (3.7)  | 34/686               | (5.0)  | 9/290                | (3.1)  |

354

355

356 In terms of educational attainment at age 25, membership in the *increasing exercisers* group was associated with  
357 lower odds of year 12 high school completion, compared with *regular weekly* exercisers (adjusted OR for  
358 *increasing exercisers* =0.43, 95% CI 0.23, 0.80;  $p<.008$ )(Fig 20). Young people in the *decreasing exerciser* group  
359 were less likely than *regular weekly* exercisers to participate in the workforce at age 25 (adjusted OR for  
360 *decreasing exercisers* =0.58, 95% CI 0.35, 0.95;  $p<.031$ ) (Fig 22). There were no other associations of exercise  
361 trajectory membership with measures of educational or occupational attainment.

362

## 363 4. Discussion

364 To our knowledge, this study is the largest longitudinal investigation to date of long-term recreational exercise  
365 patterns in young people during the transition from adolescence to early adulthood. Using GBTM, we delineated  
366 four distinct patterns of exercise behaviours over the 8-year period from age 16 to 24, for each of two definitions  
367 of exercise engagement. Factors predicting long-term adherence to daily recreational exercise as recommended  
368 by WHO guidelines were male gender, higher levels of academic self-efficacy, higher levels of sports  
369 participation, less time spent watching TV, identifying as indigenous, and lower parental socioeconomic status  
370 (SES). Higher academic literacy at age 15 was associated with a decreased likelihood of adhering to WHO  
371 guidelines over the subsequent 8 years, and with increased odds of reducing exercise from daily levels, over time.

372 Conversely, factors at age 15 predicting highly irregular (less than *once weekly*) exercise over time were female  
373 gender, lower levels of academic self-efficacy, lower levels of sports participation, more time spent watching TV,  
374 and lower parental socioeconomic status (SES). Higher academic literacy at age 15 increased the risk of falling  
375 into both the *declining exerciser* and the *increasing exerciser* groups.

376 At age 25, participants in the *guideline* exercise trajectories were more likely to report better general health,  
377 compared with those who never met guideline frequency (model 1), while young people with persistent irregular  
378 exercise of less than once weekly frequency, were more likely to report poorer outcomes in measures of general  
379 health, mental health, and life satisfaction compared to the more regular (at least once weekly) exercisers (model  
380 2) (Fig 3). Measures of educational attainment or participation in the labour force were not associated with  
381 exercise trajectory membership.

382 Earlier studies applying GBTM to primary school children to about 18 years of age found evidence that latent  
383 classes of exercise behaviours with best model fit were of 2 to 4 groups in size [33, 34]. Overall, these studies  
384 suggest that physical activity levels decline from childhood to the age of about 16 in most children. Our model 2  
385 indicated that between the ages of 16 and 24, self-reported exercise patterns were relatively stable at a modest  
386 level (once weekly or more) for a majority of participants, consistent with other studies in older adolescents  
387 reporting that the majority clustered within stable trajectories of low- to moderate exercise frequency [35]. The  
388 notion that long-term exercise habits are already quite firmly established by late adolescence is further supported  
389 by studies that followed young adults into mid-adulthood, showing that most participants were either stably  
390 “moderately active” [36], “persistently low active” [37], or “inactive” [38]. Notably, the latter two studies also  
391 support our finding of discernible smaller groups who show changes in exercise behaviours in late adolescence  
392 and adulthood (i.e., “increasers” and “decreasers”).

393 Our finding that female gender is the strongest risk factor for lower or less consistent recreational physical activity  
394 between the ages of 16 and 24 (Exercise Trajectory Models 1 and 2) echoes previous reports that young females  
395 are generally less physically active than males [39], and that they are at higher risk of decreasing activity levels  
396 over time [40]. Multiple factors have been reported that put young females at disadvantage, including reduced  
397 opportunity, lower access, and lack of sports diversity, but also divergent parental and cultural expectations,  
398 stereotypes, and role models [41]. Psychological factors such as perceived sports competency may play an  
399 additional role [42]. Therefore, active encouragement and validation of female sports participation across  
400 institutions and media are required to counteract the dropout of female adolescents from regular recreational  
401 physical activity.

402 We identified that higher academic self-efficacy at age 15 predicted higher and more consistent long-term exercise  
403 behaviours. Self-efficacy is an individual’s belief in their ability to perform a specific action required to attain a  
404 desired outcome, and is thought to lead to setting higher goals, investing more effort in the pursuit of these goals,  
405 and persisting through barriers or setbacks [43]. In adolescents and young adults, associations between high levels  
406 of self-efficacy and higher physical activity levels have been shown [44], and self-efficacy is thought to be one of  
407 the driving cognitive factors for engagement in regular exercise [45]. Psychological health interventions focusing  
408 specifically on self-efficacy have shown some promise in improving exercise engagement in this age group in the  
409 short term [46]. Our findings suggest that such interventions, delivered around the age of 15, may also have a  
410 positive impact on the establishment of long-term exercise behaviours.



411 Time spent exercising and time spent watching television at age 15 were additional predictors for participation in  
412 physical exercise. Previous studies have found that sports participation in adolescence predicts physical activity  
413 in adulthood [15, 47]. An inverse relationship between longitudinal patterns of television viewing and physical  
414 exercise in teenagers has also been reported previously [48]. Our findings underscore the importance of  
415 establishing regular recreational exercise habits in early adolescence, and of limiting screen-based leisure  
416 activities, to prevent ongoing inactivity or decline.

417 While parental socioeconomic factors have been reported as important for exercise engagement in children and  
418 younger adolescents [34], we found they had less impact in our older, more independent cohort of 16-24 year-  
419 olds. Our finding of higher academic literacy as a risk factor for lower and less consistent longitudinal exercise  
420 groups is interesting, and perhaps reflects competing academic demands (e.g., university entry). Increased exercise  
421 opportunities for high academic achievers, for example through programmes in senior high school and university,  
422 should be considered.

423 The favourable outcomes at age 25 for young people engaging in at least once weekly recreational exercisers are  
424 in keeping with previous prospective studies in adult populations that have shown benefit from exercise in  
425 measures of physical [49] and mental health [9]. In adolescents and young adults, previous longitudinal studies  
426 have found advantages for regular or increasing exercisers for educational outcomes [50] and for health-related  
427 quality of life measures [14]. Recently, the first longitudinal study reporting objectively measured physical activity  
428 in 12-18 year-olds convincingly demonstrated protective effects against depressive symptoms at age 18 [35]. In  
429 contrast, one study reported that frequent physical exercise at age 14 was not associated with affective, anxiety,  
430 or substance use disorder diagnoses at age 21[51]. We argue that trajectory analysis of repeatedly-measured data  
431 provides a more accurate measure of behaviour patterns over time and is hence more sensitive for predicting  
432 longitudinal outcomes. As might be expected, outcome differences between those reporting ongoing daily exercise  
433 (“guideline”) and those with less regular regimes were less pronounced. Nevertheless, long-term daily exercisers  
434 reported significantly better subjective general health at age 25, an age where physical health concerns are not  
435 particularly prevalent. We would expect that these subtle health advantages of daily exercise increase in older age  
436 groups.

## 437 **4.1 Strengths and Limitations**

438 We used data from a national prospective cohort study with a large sample size and follow up over 8 years. As  
439 expected, participation rates declined over the course of the study, and non-random dropout may be a source of

440 bias. Supplementary Table 1 provides a comparison of baseline characteristics and trajectory group membership  
441 between those with missing outcome data and those with outcome data available. Exercise data were self-reported  
442 and are likely less reliable than more objective measures of exercise participation such as wearable actigraphy  
443 devices [52]. Objective monitoring of exercise over long periods such as the 8 years covered in our study will  
444 become more feasible in the future as wearable technology becomes increasingly widespread. The design of the  
445 exercise questionnaire used for LSAY led to skewing of categories towards very low exercise frequencies and  
446 prompted us to dichotomize exercise behaviours into binary variables used in two separate longitudinal models.  
447 While we believe that this approach captures behaviours most relevant from a public health perspective (adhering  
448 to international guidelines – model 1; and very irregular exercise engagement - model 2), future iterations of  
449 population studies such as LSAY should consider more precise scales to measure frequency of recreational  
450 exercise. We are unable to rule out residual confounding by factors not assessed in the survey with respect to the  
451 predictors of trajectory-group assignment and/or associations with the selected outcomes. These may include  
452 motivational, psychological or physiological resilience factors or life events that predispose individuals to  
453 particular patterns of exercise and achievement over the lifespan.  
454 Our study design does not allow for conclusions about a causal relationship between exercise and our reported  
455 outcomes. It is possible that young people who enjoy better health, mental health, and educational success are also  
456 more prone to regular recreational exercise, or that more regular exercise is associated with other health behaviours  
457 that moderate our reported effects, such as smoking [53].

## 458 **4.2 Implications of findings**

459 Our findings could help inform preventive health initiatives in late adolescence and early adulthood and are  
460 applicable to high-school-, university-, and vocational college settings. While a higher level of consistent  
461 recreational exercise was associated with superior long-term outcomes across the measured domains, our findings  
462 also indicate that young people who increase exercise participation over time to even moderate levels (i.e., once  
463 weekly or more) experience advantages compared to those who are consistently inactive or whose participation  
464 decreases over time. Hence, the commencement and maintenance of regular exercise should be recommended and  
465 promoted at all ages. Our findings point to subgroups of young people who might benefit from more tailored  
466 exercise-promotion interventions. These include females, those with lower levels of self-efficacy, those who are  
467 inactive at age 15 with high screen time, those from lower SES families, and high academic achievers. Future  
468 research needs to identify the specific barriers and enablers of exercise participation for these groups.

469

## 470 **5. Conclusions**

471 Patterns of recreational exercise participation in late adolescence and early adulthood can be modelled as distinct  
472 latent trajectories. High school, university, and vocational colleges are important settings to implement  
473 interventions that support young people in establishing regular physical activity. Our study identified subgroups  
474 of young people that may especially benefit from targeted interventions. We showed that regular long-term regular  
475 exercise participation during the transition to adulthood may be associated with measurable benefits for health  
476 and mental health in young adults.

477

## 478 **Acknowledgements**

479 The authors would like to acknowledge the contribution of Tasman Swanton, Cameron Forrest, Emerick Chew,  
480 and Craig Fowler at NCVET.

## 481 References

- 482 1. de Girolamo G, Dagani J, Purcell R, Cocchi A, McGorry PD. Age of onset of mental disorders  
483 and use of mental health services: needs, opportunities and obstacles. *Epidemiol Psychiatr Sci*.  
484 2012;21(1):47-57. Epub 2012/06/08. doi: 10.1017/s2045796011000746. PubMed PMID: 22670412.
- 485 2. Lascar N, Brown J, Pattison H, Barnett AH, Bailey CJ, Bellary S. Type 2 diabetes in adolescents  
486 and young adults. *Lancet Diabetes Endocrinol*. 2018;6(1):69-80. Epub 2017/08/30. doi:  
487 10.1016/S2213-8587(17)30186-9. PubMed PMID: 28847479.
- 488 3. Andersson C, Vasan RS. Epidemiology of cardiovascular disease in young individuals. *Nat Rev*  
489 *Cardiol*. 2018;15(4):230-40. Epub 2017/10/13. doi: 10.1038/nrcardio.2017.154. PubMed PMID:  
490 29022571.
- 491 4. Patton GC, Sawyer SM, Santelli JS, Ross DA, Afifi R, Allen NB, et al. Our future: a Lancet  
492 commission on adolescent health and wellbeing. *The Lancet*. 2016;387(10036):2423-78. doi:  
493 [https://doi.org/10.1016/S0140-6736\(16\)00579-1](https://doi.org/10.1016/S0140-6736(16)00579-1).
- 494 5. Sawyer SM, Afifi RA, Bearinger LH, Blakemore S-J, Dick B, Ezech AC, et al. Adolescence: a  
495 foundation for future health. *The Lancet*. 2012;379(9826):1630-40. doi:  
496 [https://doi.org/10.1016/S0140-6736\(12\)60072-5](https://doi.org/10.1016/S0140-6736(12)60072-5).
- 497 6. Weiss HA, Ferrand RA. Improving adolescent health: an evidence-based call to action. *The*  
498 *Lancet*. 2019;393(10176):1073-5.
- 499 7. Mokdad AH, Forouzanfar MH, Daoud F, Mokdad AA, El Bcheraoui C, Moradi-Lakeh M, et al.  
500 Global burden of diseases, injuries, and risk factors for young people's health during 1990–2013: a  
501 systematic analysis for the Global Burden of Disease Study 2013. *The Lancet*. 2016;387(10036):2383-  
502 401. doi: [https://doi.org/10.1016/S0140-6736\(16\)00648-6](https://doi.org/10.1016/S0140-6736(16)00648-6).
- 503 8. Mei C, Fitzsimons J, Allen N, Alvarez-Jimenez M, Amminger GP, Browne V, et al. Global  
504 research priorities for youth mental health. *Early Interv Psychiatry*. 2020;14(1):3-13. Epub  
505 2020/01/22. doi: 10.1111/eip.12878. PubMed PMID: 31960595.
- 506 9. Perales F, del Pozo-Cruz J, del Pozo-Cruz B. Impact of Physical Activity on Psychological  
507 Distress: A Prospective Analysis of an Australian National Sample. *Am J Public Health*.  
508 2014;104(12):e91-7. doi: 10.2105/AJPH.2014.302169. PubMed PMID: 103858826. Language: English.  
509 Entry Date: 20141121. Revision Date: 20150710. Publication Type: Journal Article.
- 510 10. Chekroud SR, Gueorguieva R, Zheutlin AB, Paulus M, Krumholz HM, Krystal JH, et al.  
511 Association between physical exercise and mental health in 1· 2 million individuals in the USA  
512 between 2011 and 2015: a cross-sectional study. *The Lancet Psychiatry*. 2018.
- 513 11. Guddal MH, Stensland SØ, Småstuen MC, Johnsen MB, Zwart JA, Storheim K. Physical activity  
514 and sport participation among adolescents: Associations with mental health in different age groups.  
515 Results from the Young-HUNT study: A cross-sectional survey. *BMJ Open*. 2019;9(9). doi:  
516 10.1136/bmjopen-2018-028555.
- 517 12. Kemper HCG, Monyeki KD. The Amsterdam Growth and Health longitudinal study: How  
518 important is physical activity in youth for later health? (ELS 33). *Cardiovasc J Afr*. 2019;30(3):138-41.  
519 doi: 10.5830/CVJA-2018-057.
- 520 13. Guo C, Tomson G, Keller C, Söderqvist F. Prevalence and correlates of positive mental health  
521 in Chinese adolescents. *BMC Public Health*. 2018;18(1):263. doi: 10.1186/s12889-018-5133-2.
- 522 14. Omorou AY, Langlois J, Lecomte E, Brianchon S, Vuillemin A. Cumulative and bidirectional  
523 association of physical activity and sedentary behaviour with health-related quality of life in  
524 adolescents. *Qual Life Res*. 2016;25(5):1169-78. doi: 10.1007/s11136-015-1172-7.
- 525 15. Makela S, Aaltonen S, Korhonen T, Rose RJ, Kaprio J. Diversity of leisure-time sport activities  
526 in adolescence as a predictor of leisure-time physical activity in adulthood. *Scand J Med Sci Sports*.  
527 2017;27(12):1902-12. Epub 2017/01/21. doi: 10.1111/sms.12837. PubMed PMID: 28106293;  
528 PubMed Central PMCID: PMC5806530.

- 529 16. McPhie ML, Rawana JS. The effect of physical activity on depression in adolescence and  
530 emerging adulthood: A growth-curve analysis. *J Adolesc.* 2015;40:83-92. doi:  
531 10.1016/j.adolescence.2015.01.008.
- 532 17. Lounassalo I, Salin K, Kankaanpaa A, Hirvensalo M, Palomaki S, Tolvanen A, et al. Distinct  
533 trajectories of physical activity and related factors during the life course in the general population: a  
534 systematic review. *BMC Public Health.* 2019;19(1):271. Epub 2019/03/08. doi: 10.1186/s12889-019-  
535 6513-y. PubMed PMID: 30841921; PubMed Central PMCID: PMC6404287.
- 536 18. Schubert KO, Clark SR, Van LK, Collinson JL, Baune BT. Depressive symptom trajectories in  
537 late adolescence and early adulthood: A systematic review. *Aust N Z J Psychiatry.* 2017;51(5):477-99.  
538 Epub 2017/04/19. doi: 10.1177/0004867417700274. PubMed PMID: 28415879.
- 539 19. Longitudinal Survey of Australian Youth (LSAY). In: Training. AGDoEa, editor. 2015 ed.  
540 Canberra: The Australian Data Archive on behalf of The Australian Government Department of  
541 Education and Training.; 2015.
- 542 20. Parvazian S, Semo R. The longitudinal surveys of Australian youth: 20 years and beyond.  
543 *Australian Economic Review.* 2018;51(3):426-40.
- 544 21. WHO. Physical activity. Fact Sheets2023.
- 545 22. Sallis JF, Prochaska JJ, Taylor WC. A review of correlates of physical activity of children and  
546 adolescents. *Med Sci Sports Exerc.* 2000;32(5):963-75.
- 547 23. Park H, Kim N. Predicting Factors of Physical Activity in Adolescents: A Systematic Review.  
548 *Asian Nurs Res (Korean Soc Nurs Sci).* 2008;2(2):113-28. doi: [https://doi.org/10.1016/S1976-](https://doi.org/10.1016/S1976-1317(08)60035-3)  
549 1317(08)60035-3.
- 550 24. Craggs C, Corder K, van Sluijs EMF, Griffin SJ. Determinants of Change in Physical Activity in  
551 Children and Adolescents: A Systematic Review. *Am J Prev Med.* 2011;40(6):645-58. doi:  
552 <https://doi.org/10.1016/j.amepre.2011.02.025>.
- 553 25. Zimmermann-Sloutskis D, Wanner M, Zimmermann E, Martin BW. Physical activity levels and  
554 determinants of change in young adults: A longitudinal panel study. *International Journal of*  
555 *Behavioral Nutrition and Physical Activity.* 2010;2. doi: 10.1186/1479-5868-7-2.
- 556 26. Graham DJ, Bauer KW, Friend S, Barr-Anderson DJ, Nuemark-Sztainer D. Personal,  
557 behavioral, and socioenvironmental correlates of physical activity among adolescent girls: cross-  
558 sectional and longitudinal associations. *Journal of Physical activity and Health.* 2014;11(1):51-61.
- 559 27. Sunderland M, Slade T, Stewart G, Andrews G. Estimating the prevalence of DSM-IV mental  
560 illness in the Australian general population using the Kessler Psychological Distress Scale. *Aust N Z J*  
561 *Psychiatry.* 2011;45(10):880-9.
- 562 28. Ware Jr JE, Sherbourne CD. The MOS 36-item short-form health survey (SF-36): I. Conceptual  
563 framework and item selection. *Med Care.* 1992;473-83.
- 564 29. Kessler RC, Green JG, Gruber MJ, Sampson NA, Bromet E, Cuitan M, et al. Screening for  
565 serious mental illness in the general population with the K6 screening scale: results from the WHO  
566 World Mental Health (WMH) survey initiative. *Int J Methods Psychiatr Res.* 2010;19(S1):4-22.
- 567 30. Nagin DS. *Group-Based Modeling of Development*: Harvard University Press; 2005  
568 04/25/2005.
- 569 31. Jones BLN, D.S. A Note on a Stata Plugin for Estimating Group-based Trajectory Models.  
570 *Sociological Methods & Research.* 2013;42(4):608-13. doi: 10.1177/0049124113503141.
- 571 32. Nagin DS, Odgers CL. Group-based trajectory modeling in clinical research. *Annu Rev Clin*  
572 *Psychol.* 2010;6.
- 573 33. Kwon S, Janz KF, Letuchy EM, Burns TL, Levy SM. Developmental Trajectories of Physical  
574 Activity, Sports, and Television Viewing During Childhood to Young Adulthood: Iowa Bone  
575 Development Study. *JAMA pediatrics.* 2015;169(7):666-72. doi: 10.1001/jamapediatrics.2015.0327.  
576 PubMed PMID: 25984811.
- 577 34. Findlay LC, Garner RE, Kohen DE. Patterns of children's participation in unorganized physical  
578 activity. *Res Q Exerc Sport.* 2010;81(2):133-42. Epub 2010/06/10. doi:  
579 10.1080/02701367.2010.10599660. PubMed PMID: 20527298.

- 580 35. Kandola A, Lewis G, Osborn DPJ, Stubbs B, Hayes JF. Depressive symptoms and objectively  
581 measured physical activity and sedentary behaviour throughout adolescence: a prospective cohort  
582 study. *Lancet Psychiatry*. 2020;7(3):262-71. Epub 2020/02/16. doi: 10.1016/S2215-0366(20)30034-1.  
583 PubMed PMID: 32059797; PubMed Central PMCID: PMC7033559.
- 584 36. Oura P, Paananen M, Niinimäki J, Tammelin T, Herrala S, Auvinen J, et al. Effects of leisure-  
585 time physical activity on vertebral dimensions in the Northern Finland Birth Cohort 1966. *Sci Rep*.  
586 2016;6:27844.
- 587 37. Rovio SP, Yang X, Kankaanpää A, Aalto V, Hirvensalo M, Telama R, et al. Longitudinal physical  
588 activity trajectories from childhood to adulthood and their determinants: The Young Finns Study.  
589 *Scand J Med Sci Sports*. 2018;28(3):1073-83. Epub 2017/10/26. doi: 10.1111/sms.12988. PubMed  
590 PMID: 28981988.
- 591 38. Barnett TA, Gauvin L, Craig CL, Katzmarzyk PT. Distinct trajectories of leisure time physical  
592 activity and predictors of trajectory class membership: a 22 year cohort study. *Int J Behav Nutr Phys*  
593 *Act*. 2008;5:57. Epub 2008/11/08. doi: 10.1186/1479-5868-5-57. PubMed PMID: 18990250; PubMed  
594 Central PMCID: PMC2613394.
- 595 39. Al-Thani M, Al-Thani A, Alyafei S, Al-Kuwari MG, Al-Chetachi W, Khalifa SE, et al. Prevalence  
596 of physical activity and sedentary-related behaviors among adolescents: data from the Qatar  
597 National School Survey. *Public Health*. 2018;160:150-5. doi: 10.1016/j.puhe.2018.03.019.
- 598 40. Farooq MA, Parkinson KN, Adamson AJ, Pearce MS, Reilly JK, Hughes AR, et al. Timing of the  
599 decline in physical activity in childhood and adolescence: Gateshead Millennium Cohort Study.  
600 *British journal of sports medicine*. 2018;52(15):1002-6. Epub 2017/03/16. doi: 10.1136/bjsports-  
601 2016-096933. PubMed PMID: 28288966; PubMed Central PMCID: PMC6204977.
- 602 41. Zarrett NV, P.T.; Sabo, D. *Keeping Girls in the Game: Factors that Influence Sport*  
603 *Participation* New York, NY: Women's Sports Foundation 2020.
- 604 42. Eime RM, Casey MM, Harvey JT, Sawyer NA, Symons CM, Payne WR. Socioecological factors  
605 potentially associated with participation in physical activity and sport: A longitudinal study of  
606 adolescent girls. *J Sci Med Sport*. 2015;18(6):684-90. doi: 10.1016/j.jsams.2014.09.012.
- 607 43. Bandura A. *Self-efficacy: The exercise of control*. . New York, NY: Freeman; 1997.
- 608 44. Reigal RE, Moral-Campillo L, Morillo-Baro JP, Juarez-Ruiz de Mier R, Hernandez-Mendo A,  
609 Morales-Sanchez V. Physical Exercise, Fitness, Cognitive Functioning, and Psychosocial Variables in  
610 an Adolescent Sample. *Int J Environ Res Public Health*. 2020;17(3). Epub 2020/02/14. doi:  
611 10.3390/ijerph17031100. PubMed PMID: 32050482; PubMed Central PMCID: PMC7037912.
- 612 45. Hamilton K, Warner LM, Schwarzer R. The Role of Self-Efficacy and Friend Support on  
613 Adolescent Vigorous Physical Activity. *Health Educ Behav*. 2017;44(1):175-81. Epub 2016/05/27. doi:  
614 10.1177/1090198116648266. PubMed PMID: 27226431.
- 615 46. Dishman RK, Motl RW, Saunders R, Felton G, Ward DS, Dowda M, et al. Self-efficacy partially  
616 mediates the effect of a school-based physical-activity intervention among adolescent girls.  
617 *Preventive medicine*. 2004;38(5):628-36. Epub 2004/04/07. doi: 10.1016/j.ypmed.2003.12.007.  
618 PubMed PMID: 15066366.
- 619 47. Jose KA, Blizzard L, Dwyer T, McKercher C, Venn AJ. Childhood and adolescent predictors of  
620 leisure time physical activity during the transition from adolescence to adulthood: a population  
621 based cohort study. *Int J Behav Nutr Phys Act*. 2011;8:54. Epub 2011/06/03. doi: 10.1186/1479-  
622 5868-8-54. PubMed PMID: 21631921; PubMed Central PMCID: PMC3129289.
- 623 48. Kwon S, Lee J, Carnethon MR. Developmental trajectories of physical activity and television  
624 viewing during adolescence among girls: National Growth and Health Cohort Study. *BMC public*  
625 *health*. 2015;15:667-. doi: 10.1186/s12889-015-2043-4. PubMed PMID: 26174016.
- 626 49. Saint-Maurice PF, Coughlan D, Kelly SP, Keadle SK, Cook MB, Carlson SA, et al. Association of  
627 Leisure-Time Physical Activity Across the Adult Life Course With All-Cause and Cause-Specific  
628 Mortality. *JAMA network open*. 2019;2(3):e190355-e. doi: 10.1001/jamanetworkopen.2019.0355.  
629 PubMed PMID: 30848809.

- 630 50. Owen KB, Parker PD, Astell-Burt T, Lonsdale C. Regular Physical Activity and Educational  
631 Outcomes in Youth: A Longitudinal Study. *J Adolesc Health*. 2018;62(3):334-40. Epub 2017/12/13.  
632 doi: 10.1016/j.jadohealth.2017.09.014. PubMed PMID: 29229462.
- 633 51. Suetani S, Mamun A, Williams GM, Najman JM, McGrath JJ, Scott JG. Longitudinal  
634 association between physical activity engagement during adolescence and mental health outcomes  
635 in young adults: A 21-year birth cohort study. *J Psychiatr Res*. 2017;94:116-23. Epub 2017/07/14.  
636 doi: 10.1016/j.jpsychires.2017.06.013. PubMed PMID: 28704729.
- 637 52. Prince SA, Adamo KB, Hamel ME, Hardt J, Connor Gorber S, Tremblay M. A comparison of  
638 direct versus self-report measures for assessing physical activity in adults: a systematic review. *Int J  
639 Behav Nutr Phys Act*. 2008;5:56. Epub 2008/11/08. doi: 10.1186/1479-5868-5-56. PubMed PMID:  
640 18990237; PubMed Central PMCID: PMCPMC2588639.
- 641 53. Audrain-McGovern J, Rodriguez D, Rodgers K, Cuevas J, Sass J. Longitudinal variation in  
642 adolescent physical activity patterns and the emergence of tobacco use. *J Pediatr Psychol*.  
643 2012;37(6):622-33. Epub 2012/03/13. doi: 10.1093/jpepsy/jss043. PubMed PMID: 22408052;  
644 PubMed Central PMCID: PMCPMC3381712.

645

646

647

648

## 649 **Declarations**

650 The authors have no competing interests to disclose.

651

## 652 **Funding**

653 The author(s) received no specific funding for this work.

654

655 **Key words:** youth, exercise, trajectories, mental-health, education

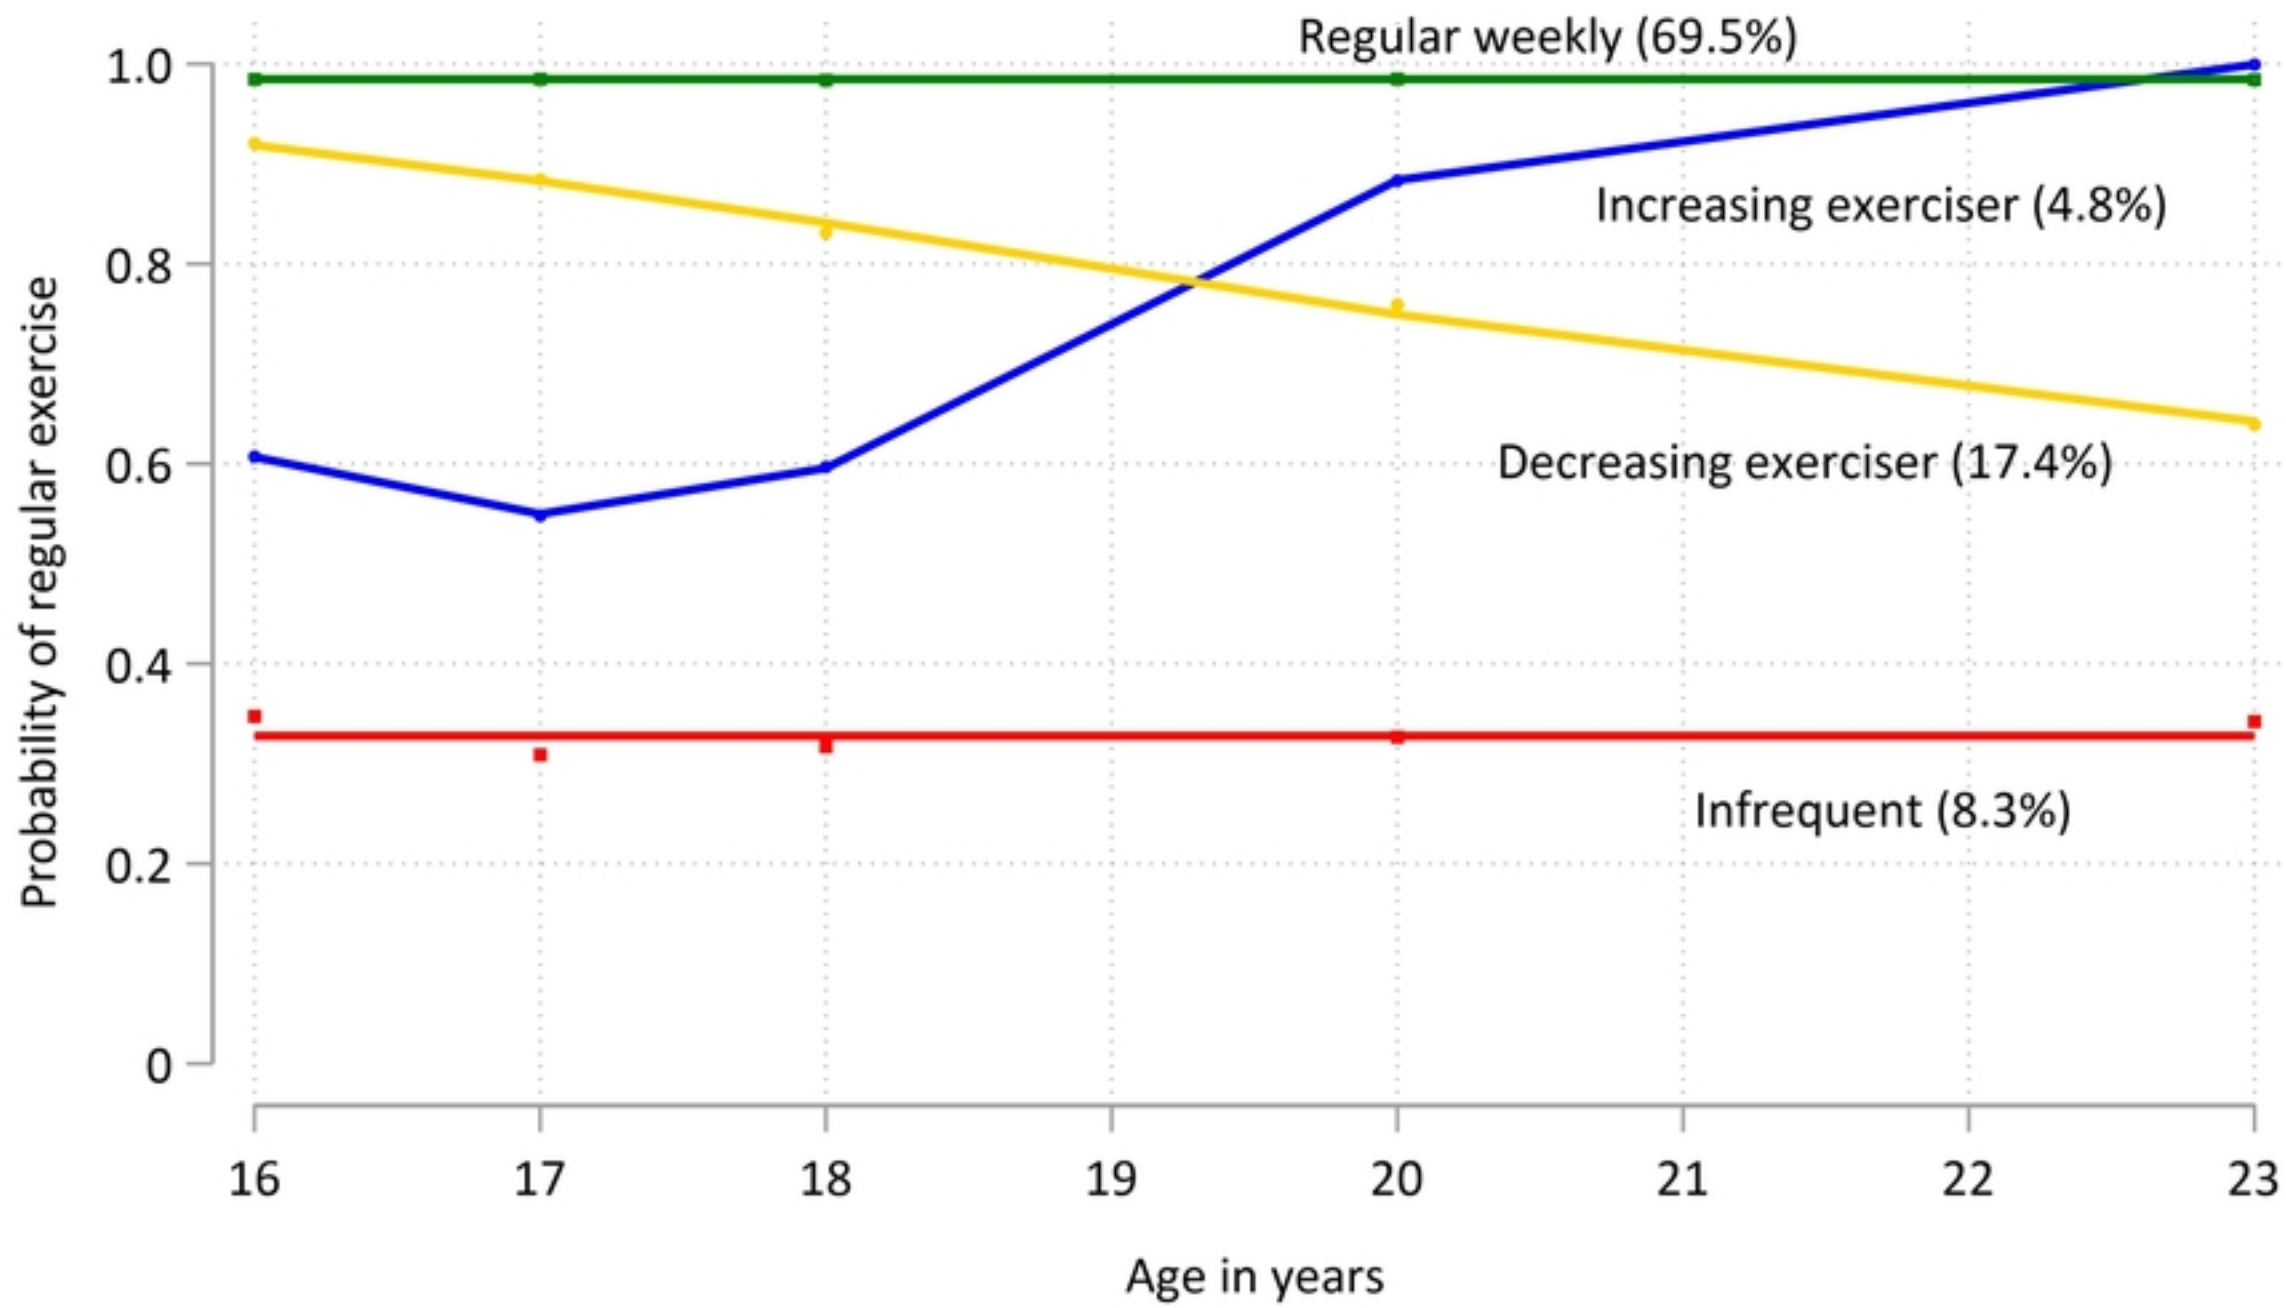

Figure 1



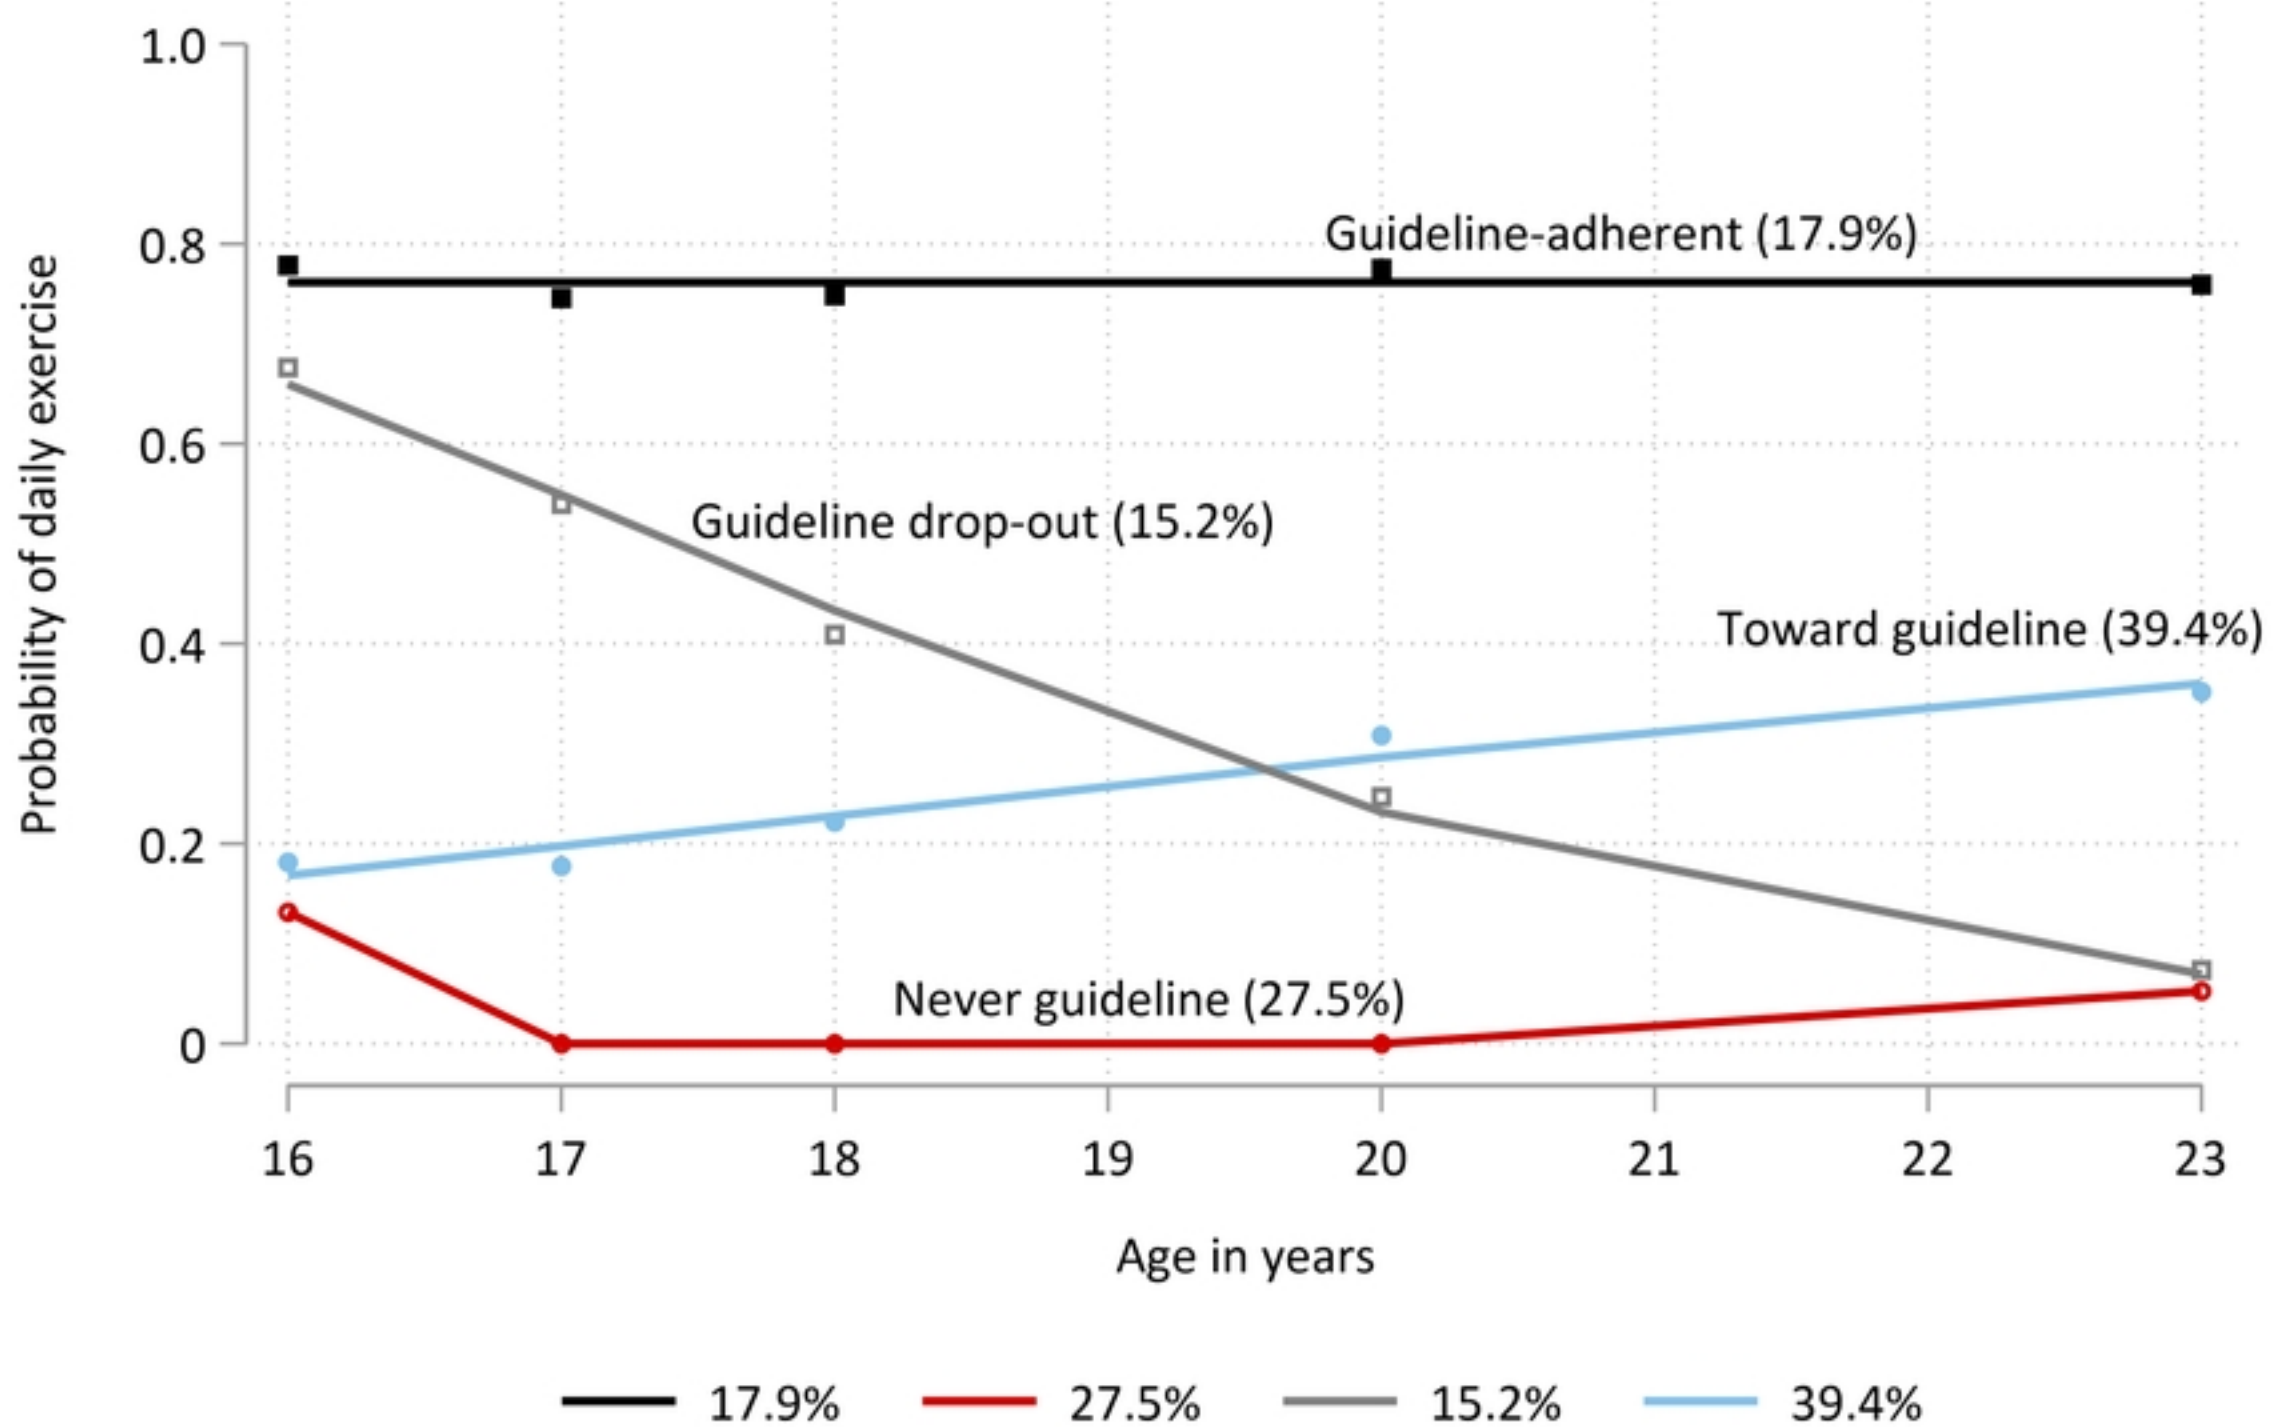

Figure 2

Adjusted Relative Risk Ratios (aRRRs) for Never-Guideline Exerciser vs Guideline-Adherent Exerciser

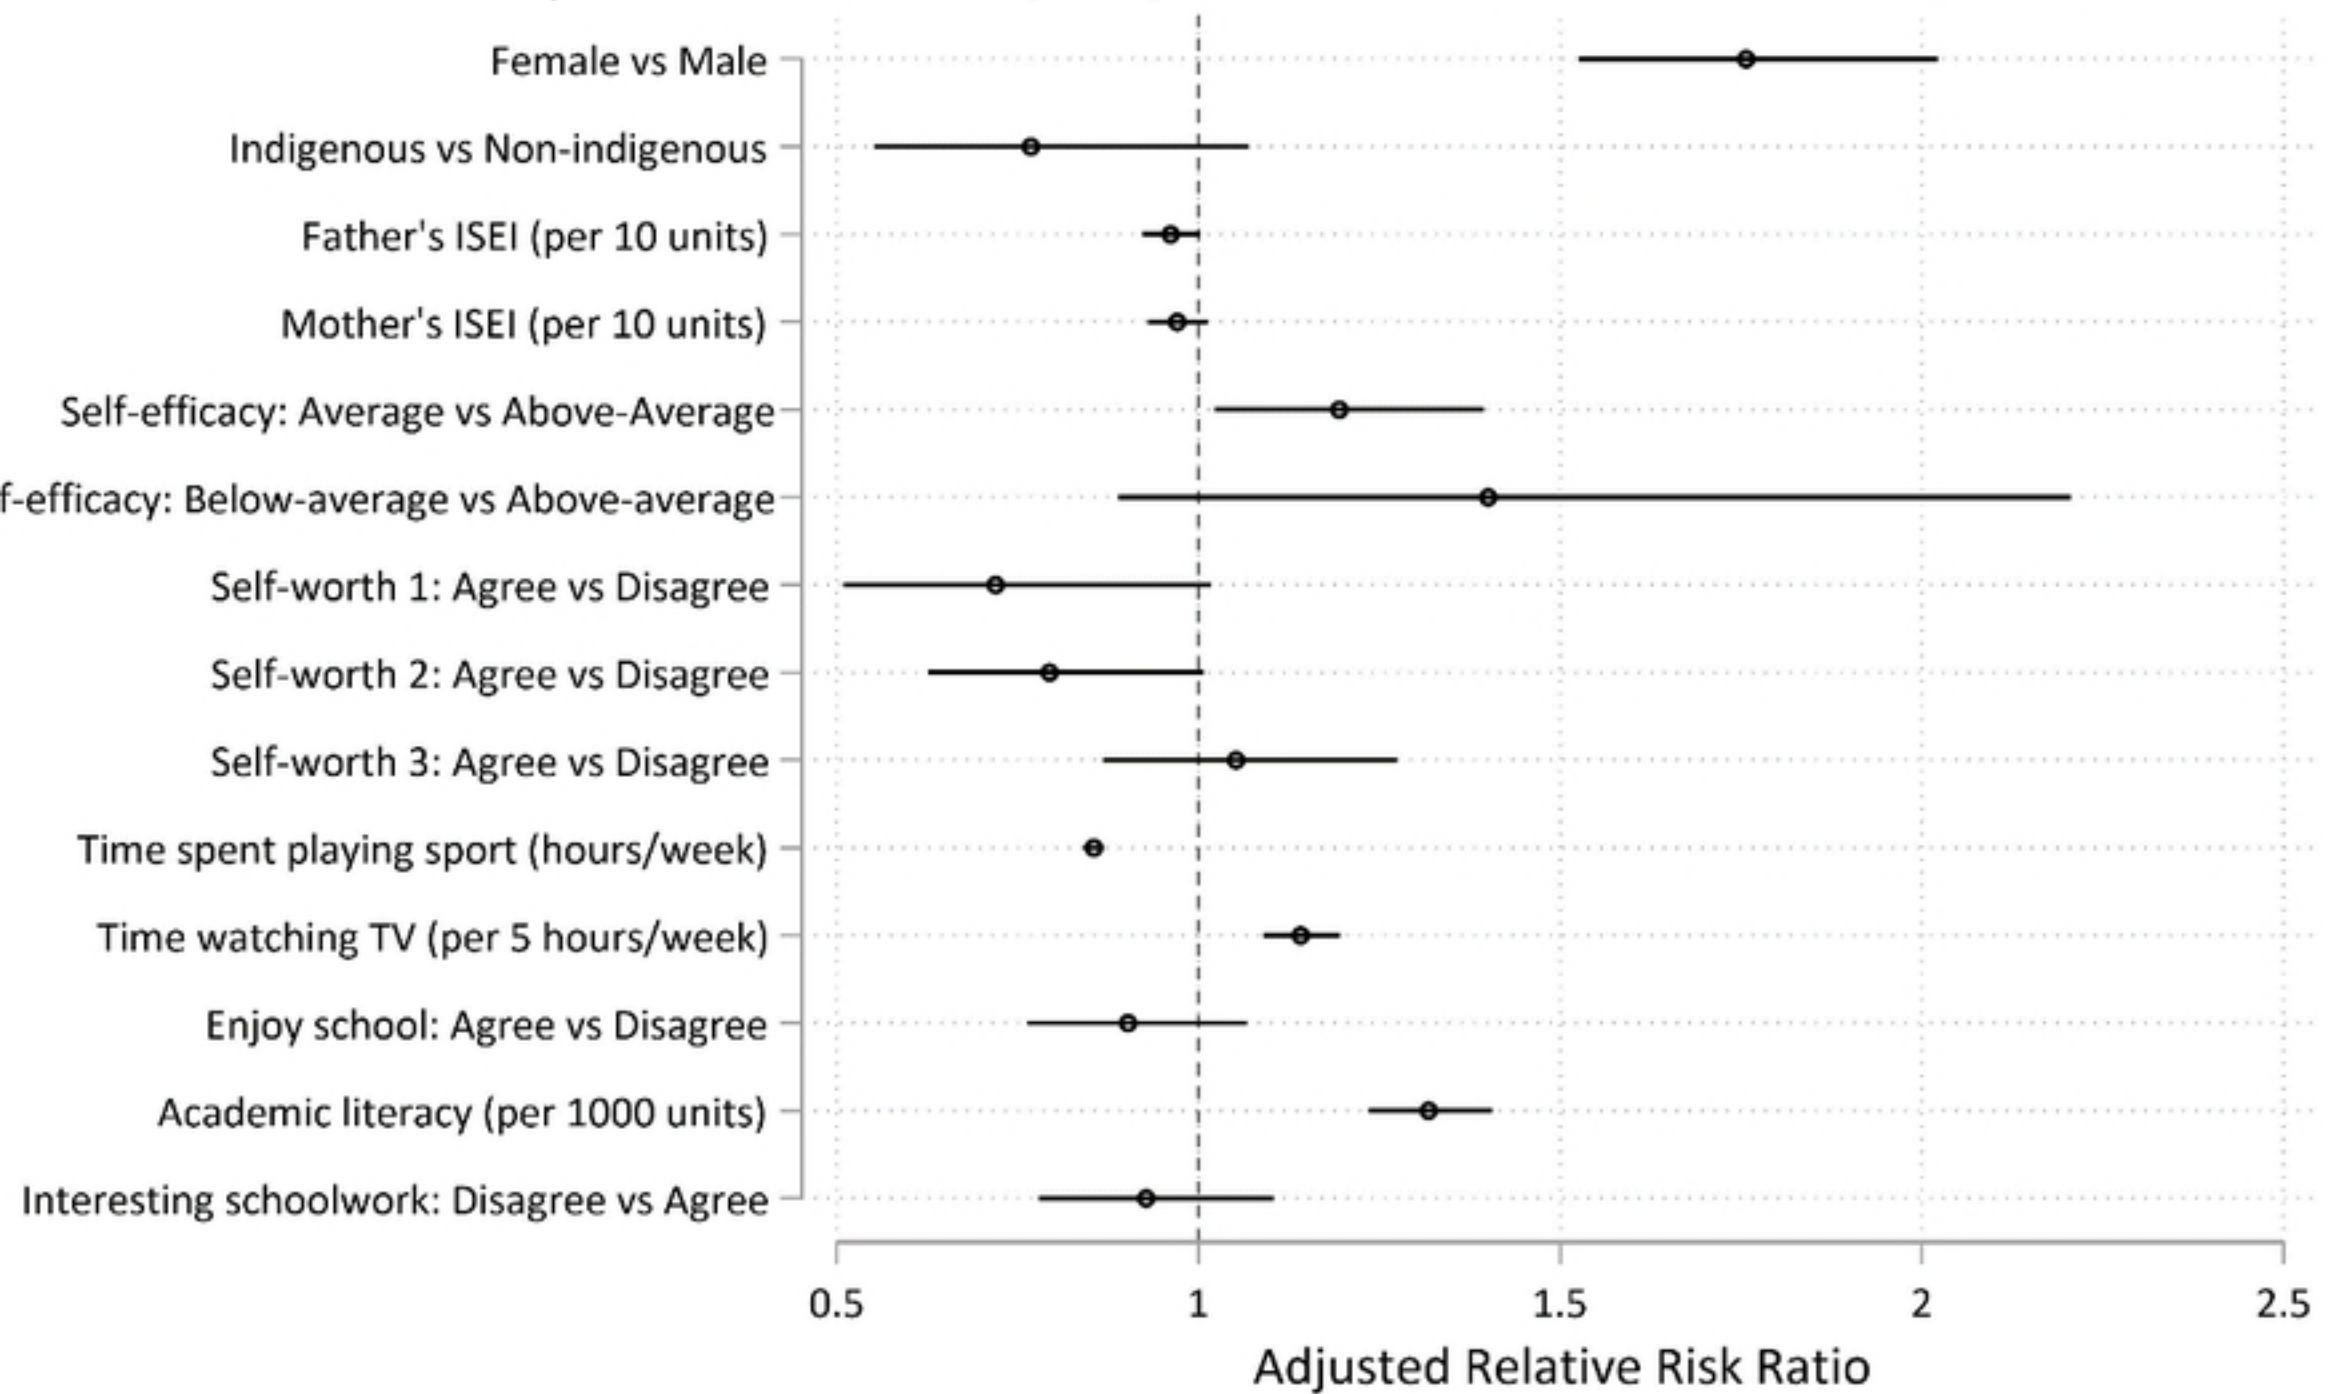

Figure 3

Adjusted Relative Risk Ratios (aRRRs) for Toward-guideline Exerciser vs Guideline-Adherent Exerciser

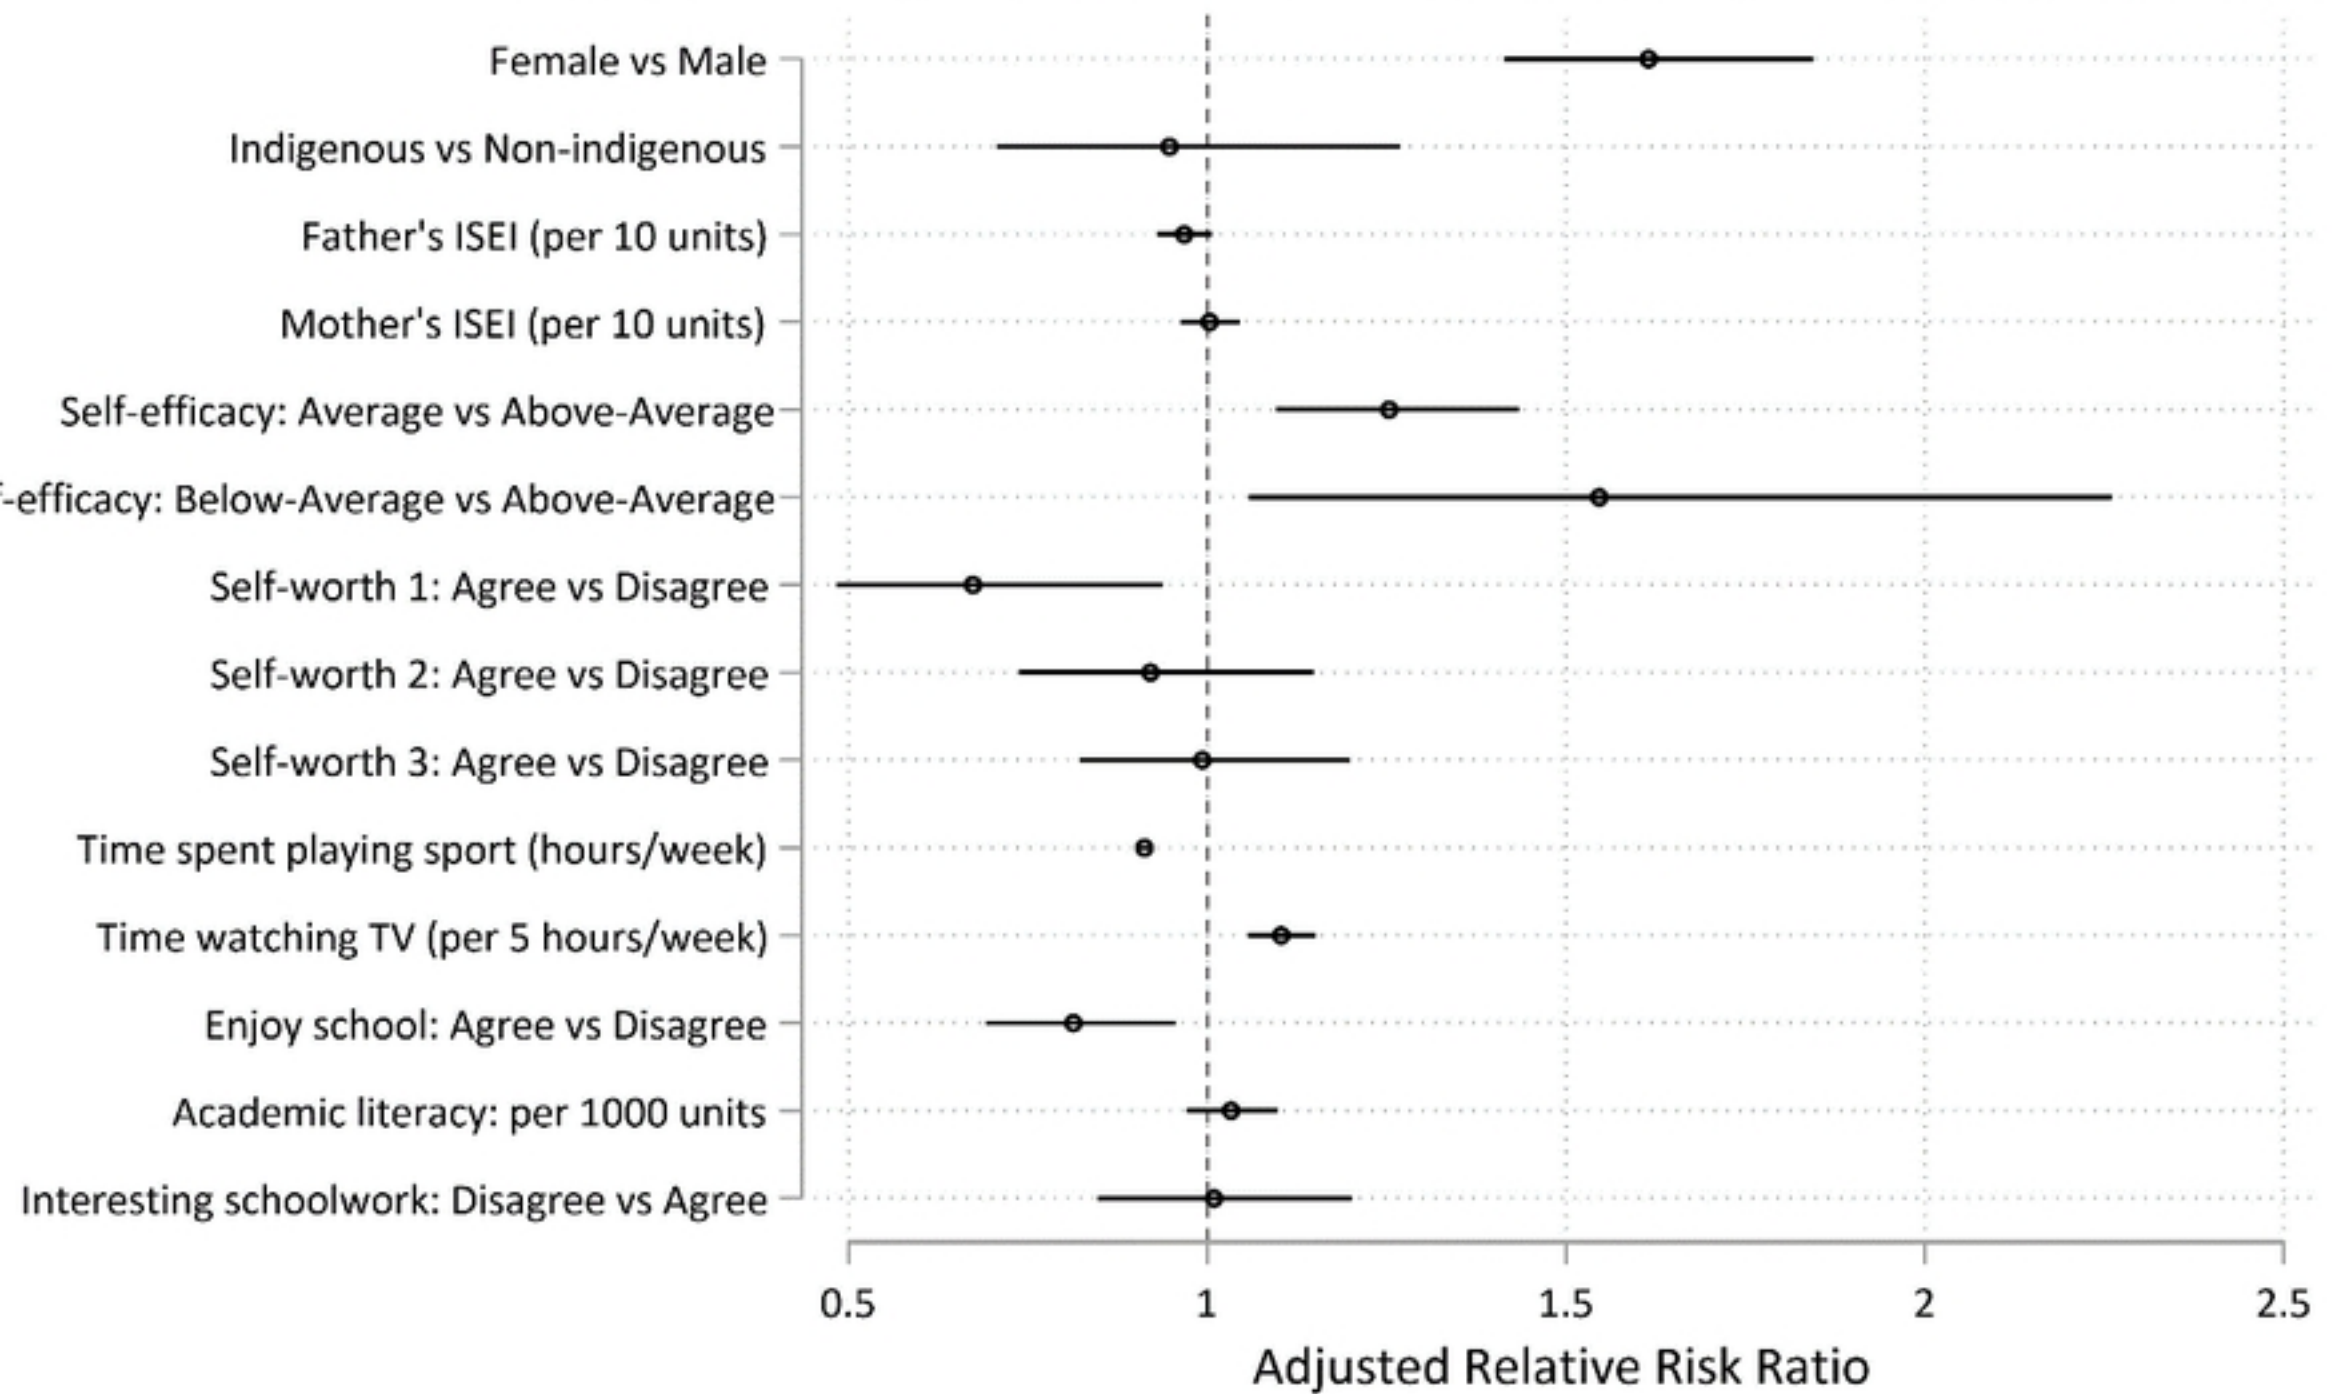

Figure 4

Adjusted Relative Risk Ratios (aRRRs) for Guideline Drop-out Exerciser vs Guideline-Adherent Exerciser

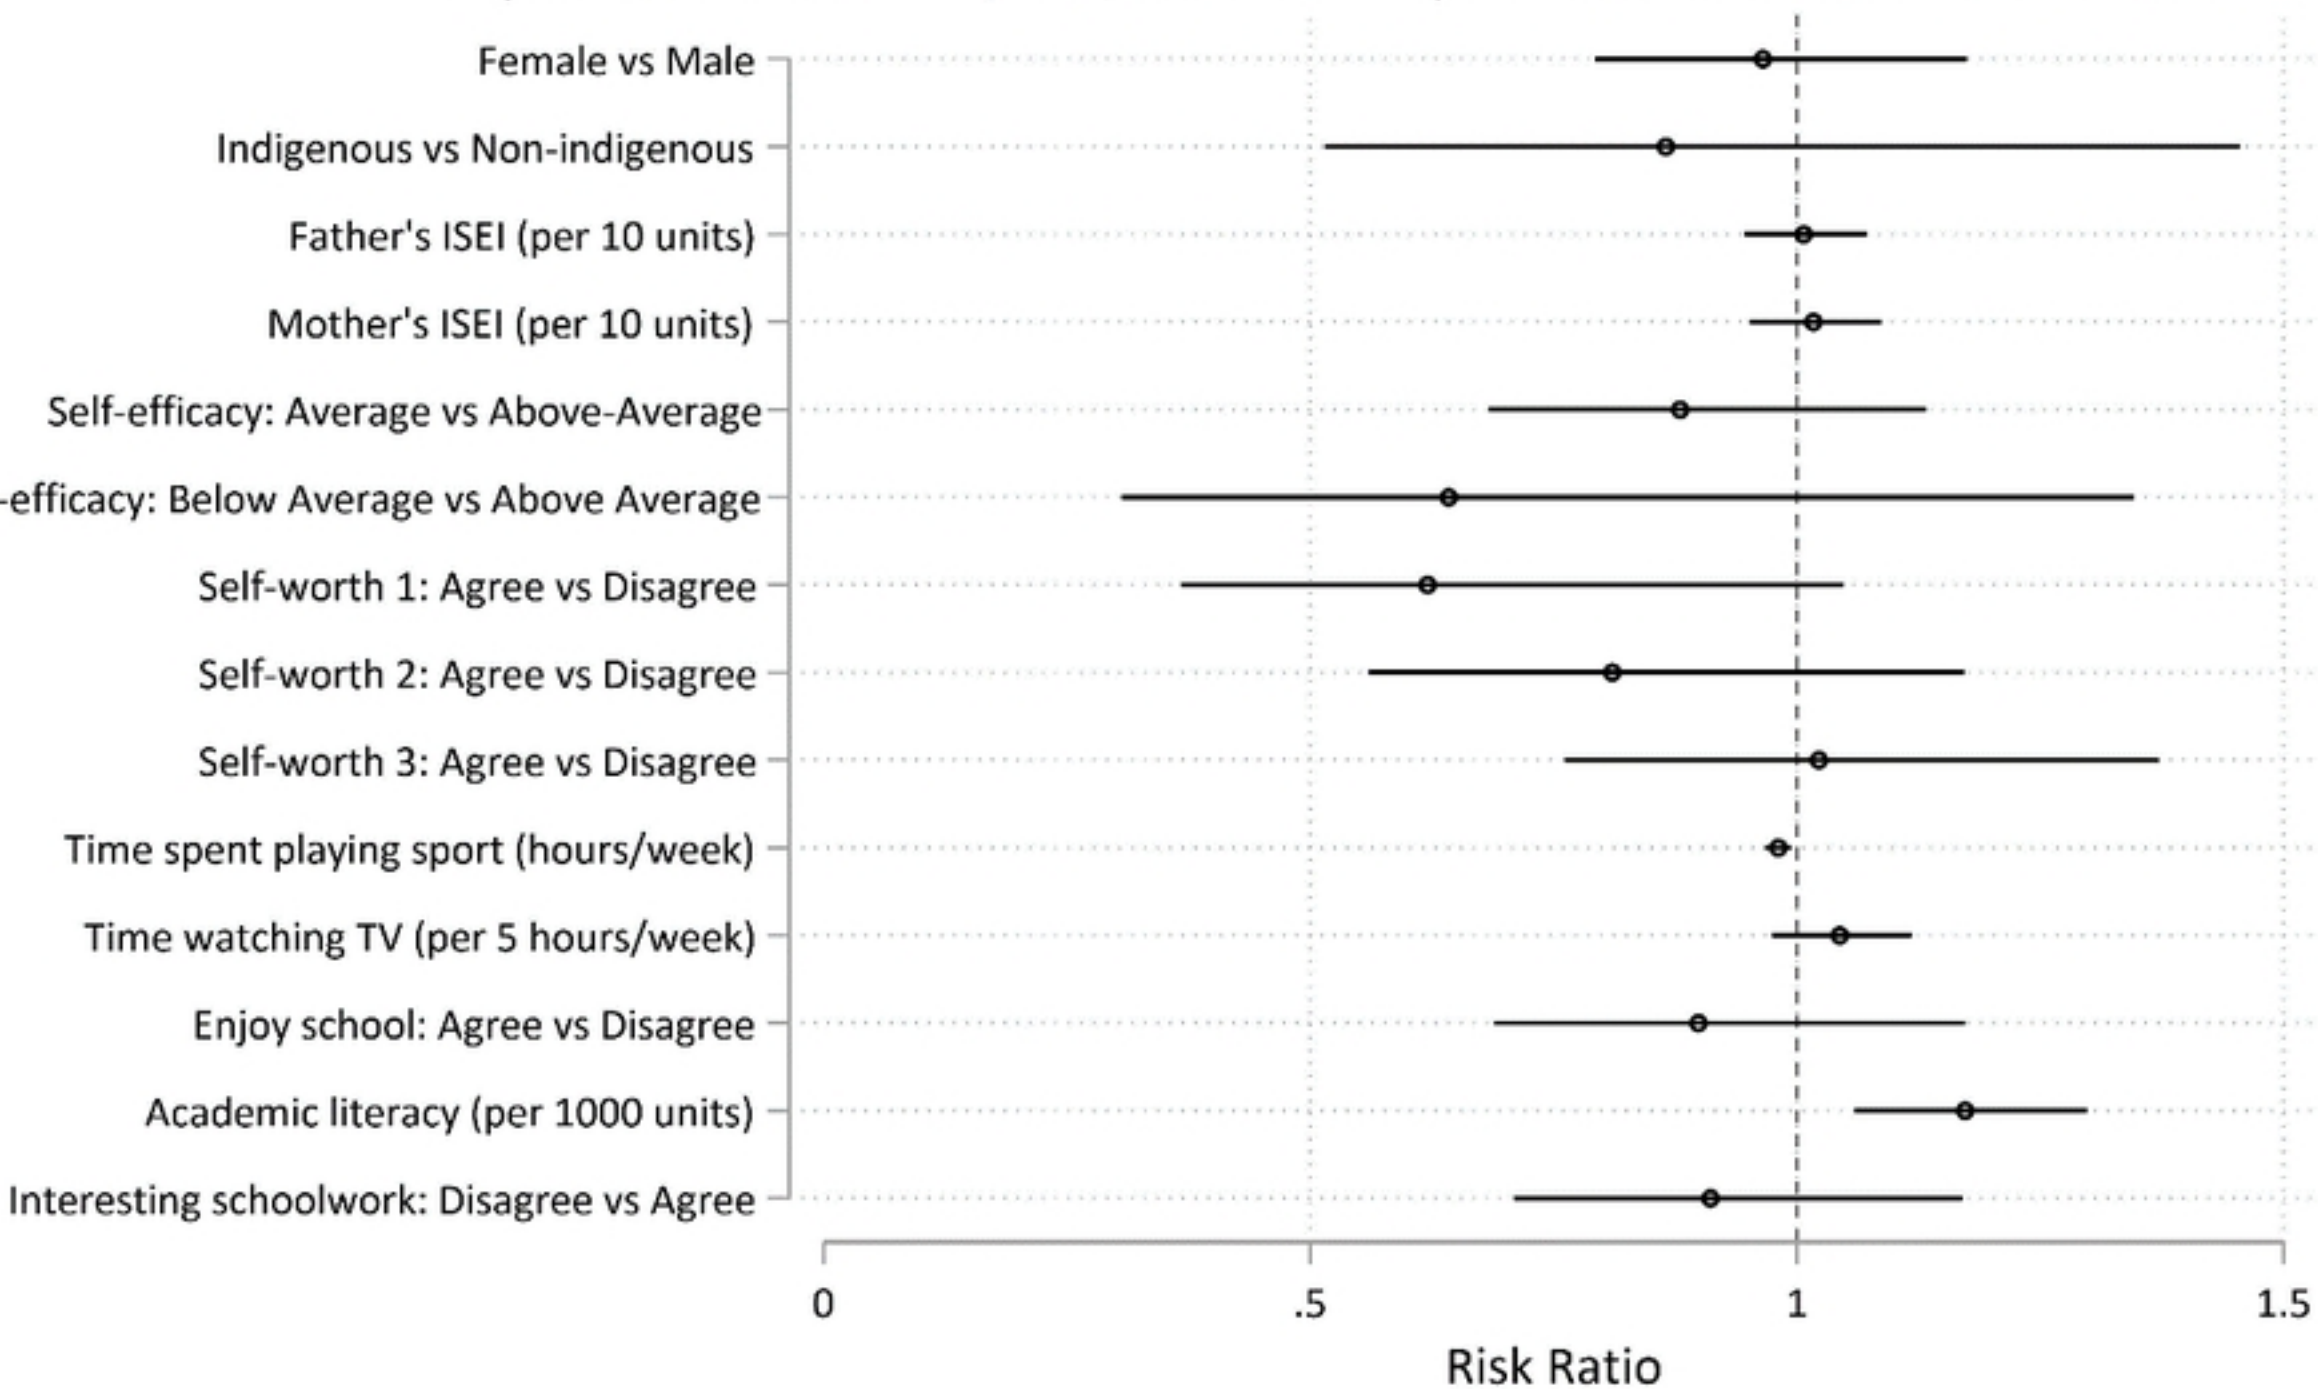

Figure 5

Relative risk ratios for Infrequent group vs Regular weekly group

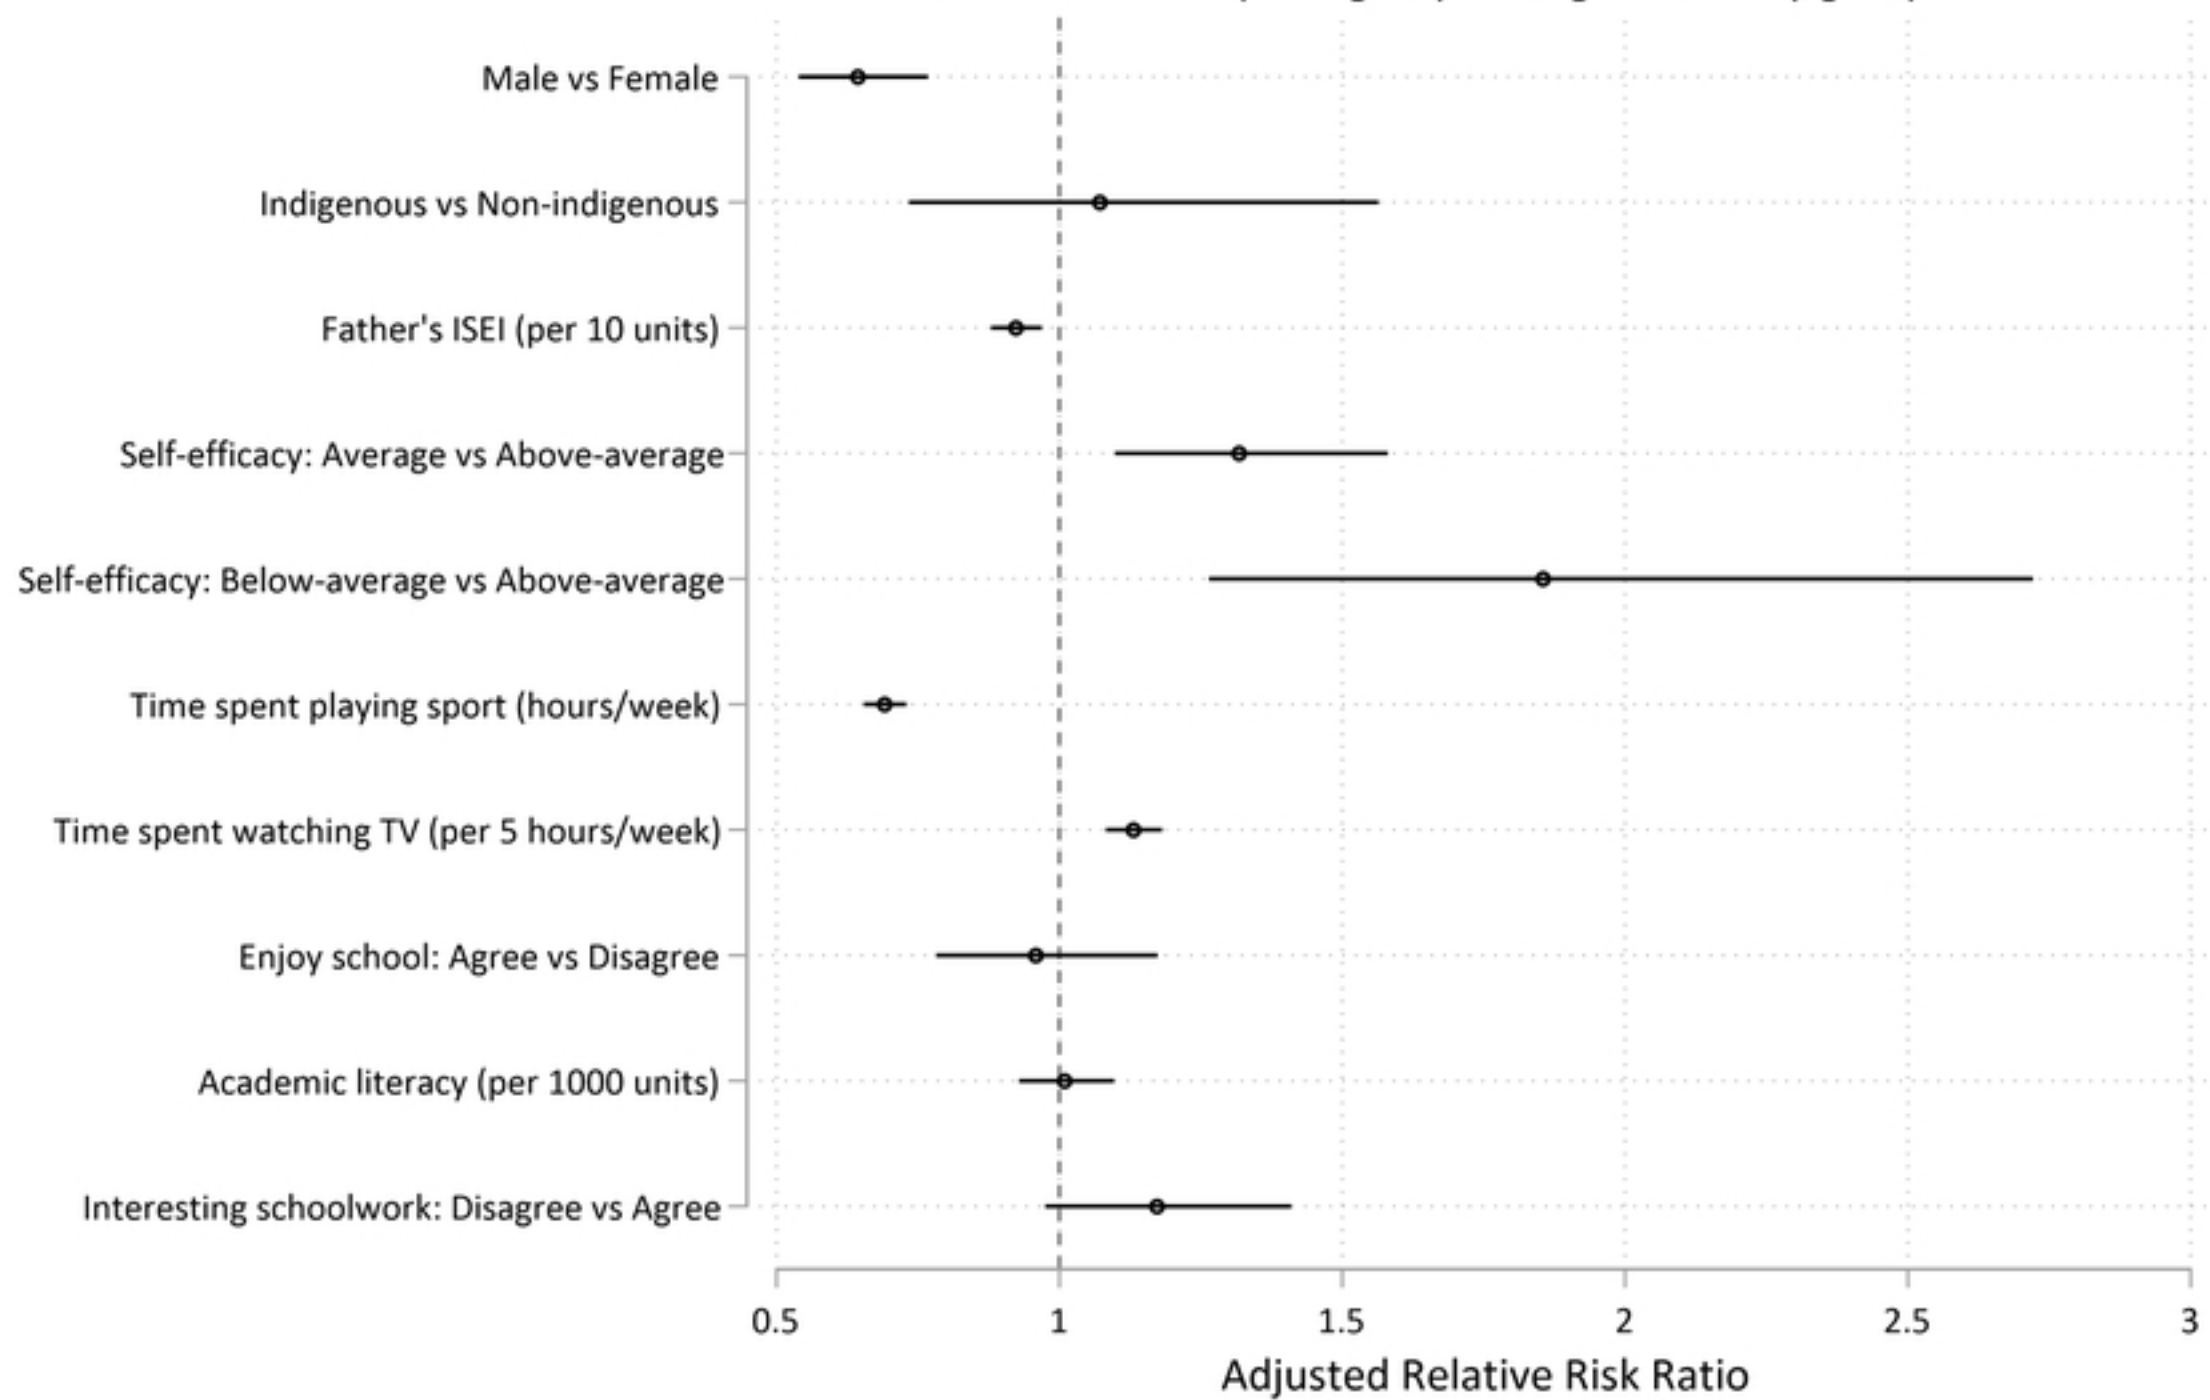

Figure 6

Relative risk ratios for Decreasing exerciser group vs Regular weekly group

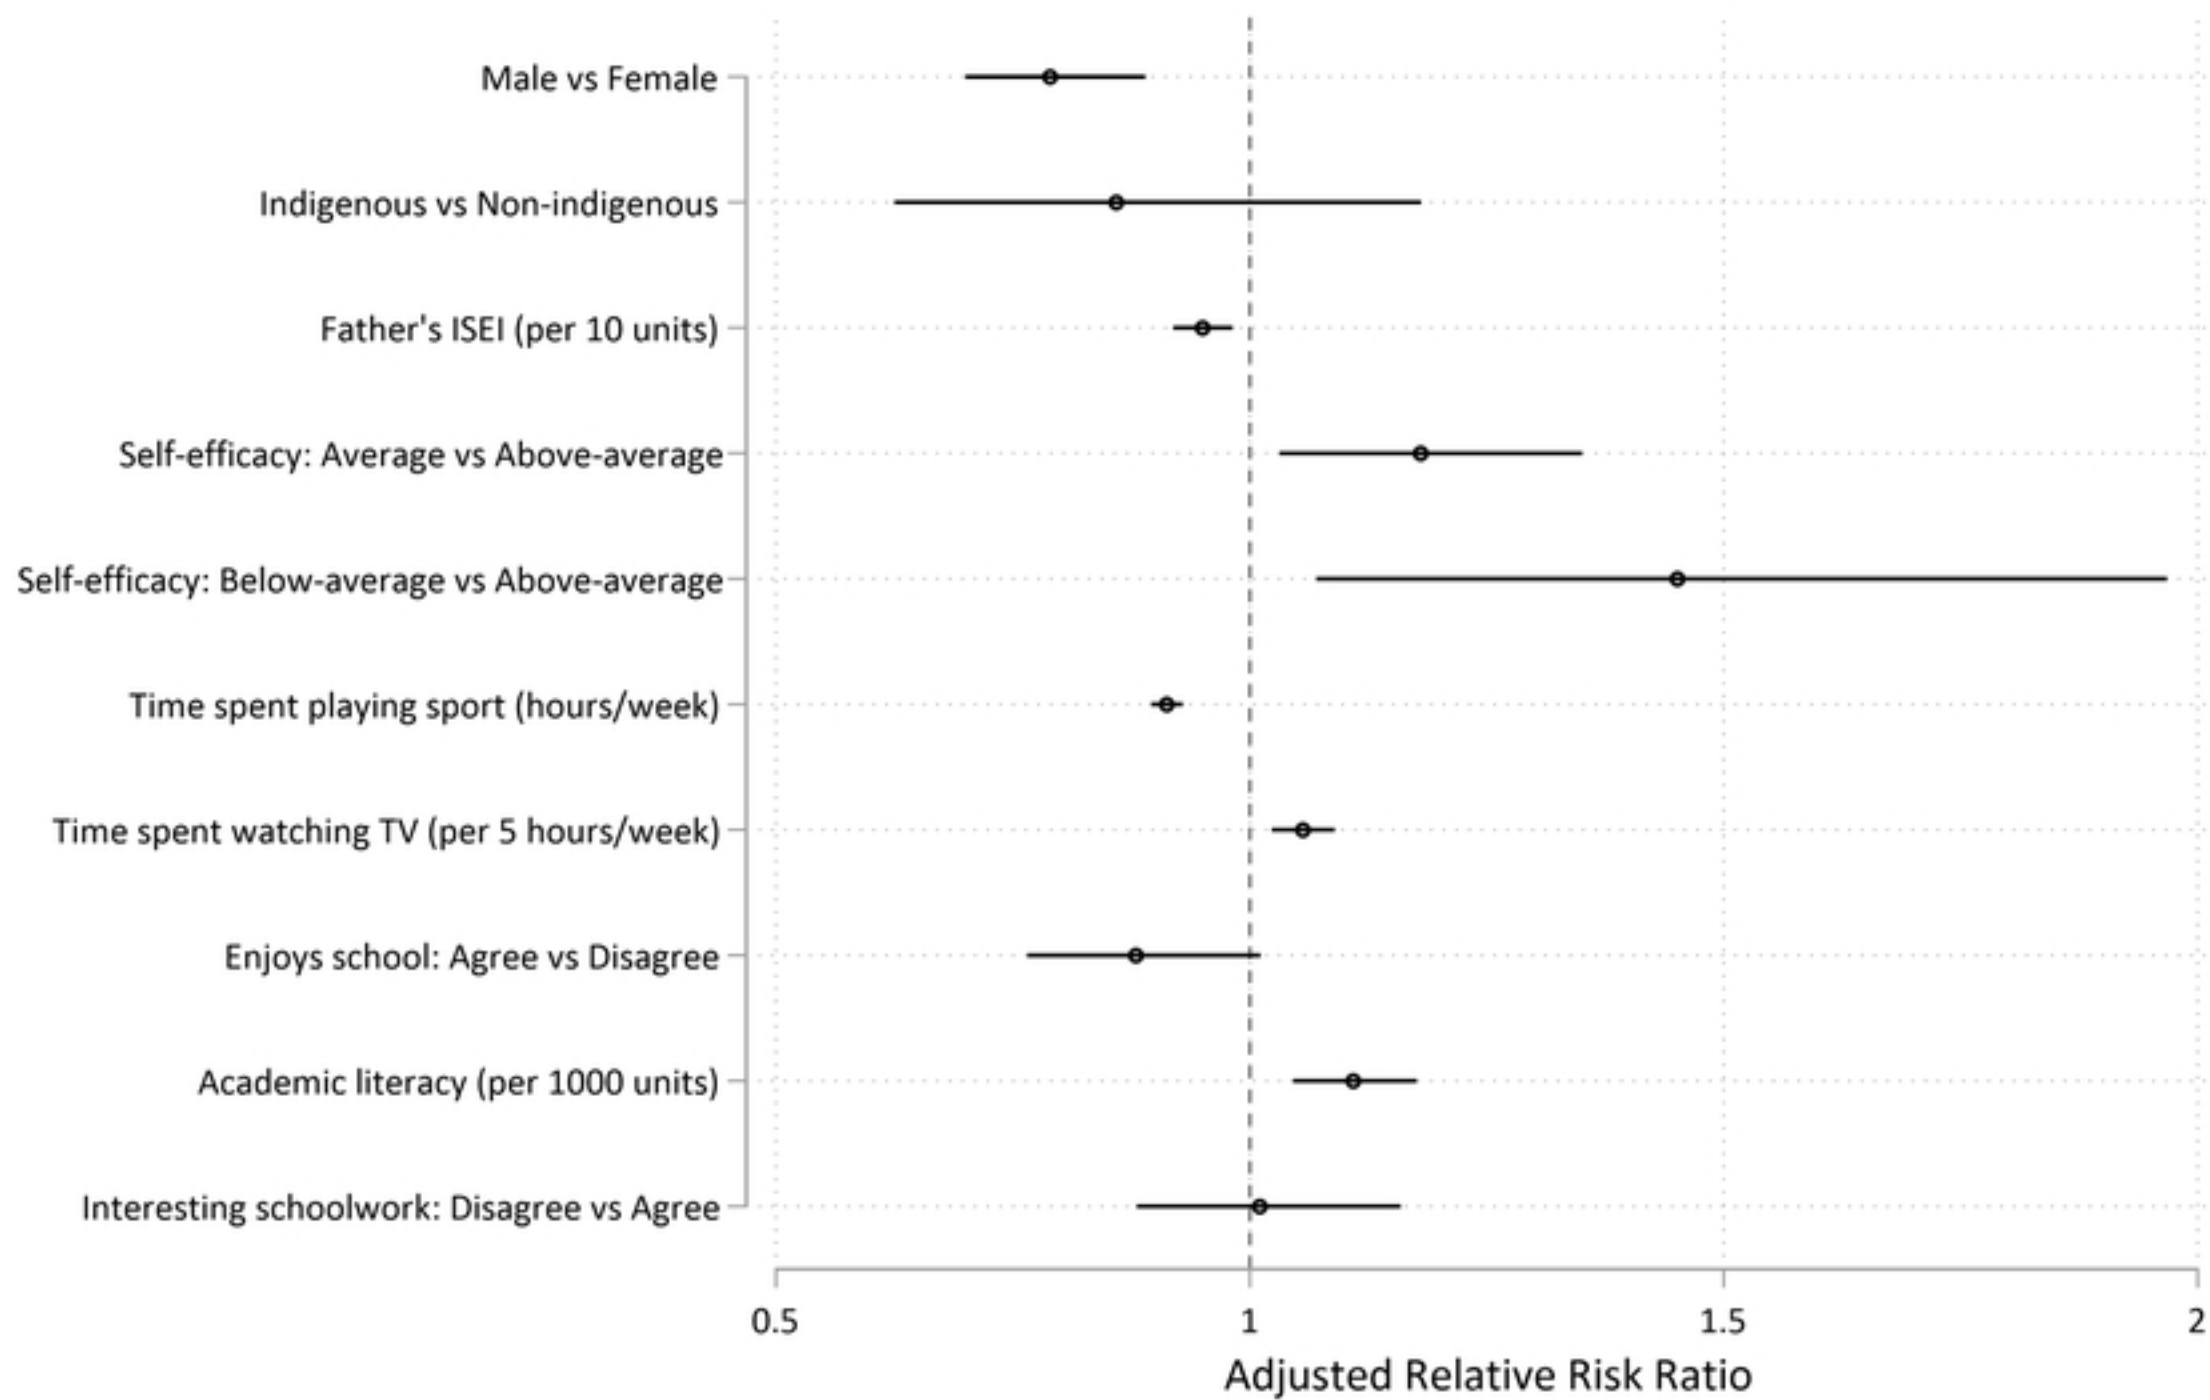

Figure 7

Relative risk ratios for Increasing exerciser group vs Regular weekly group

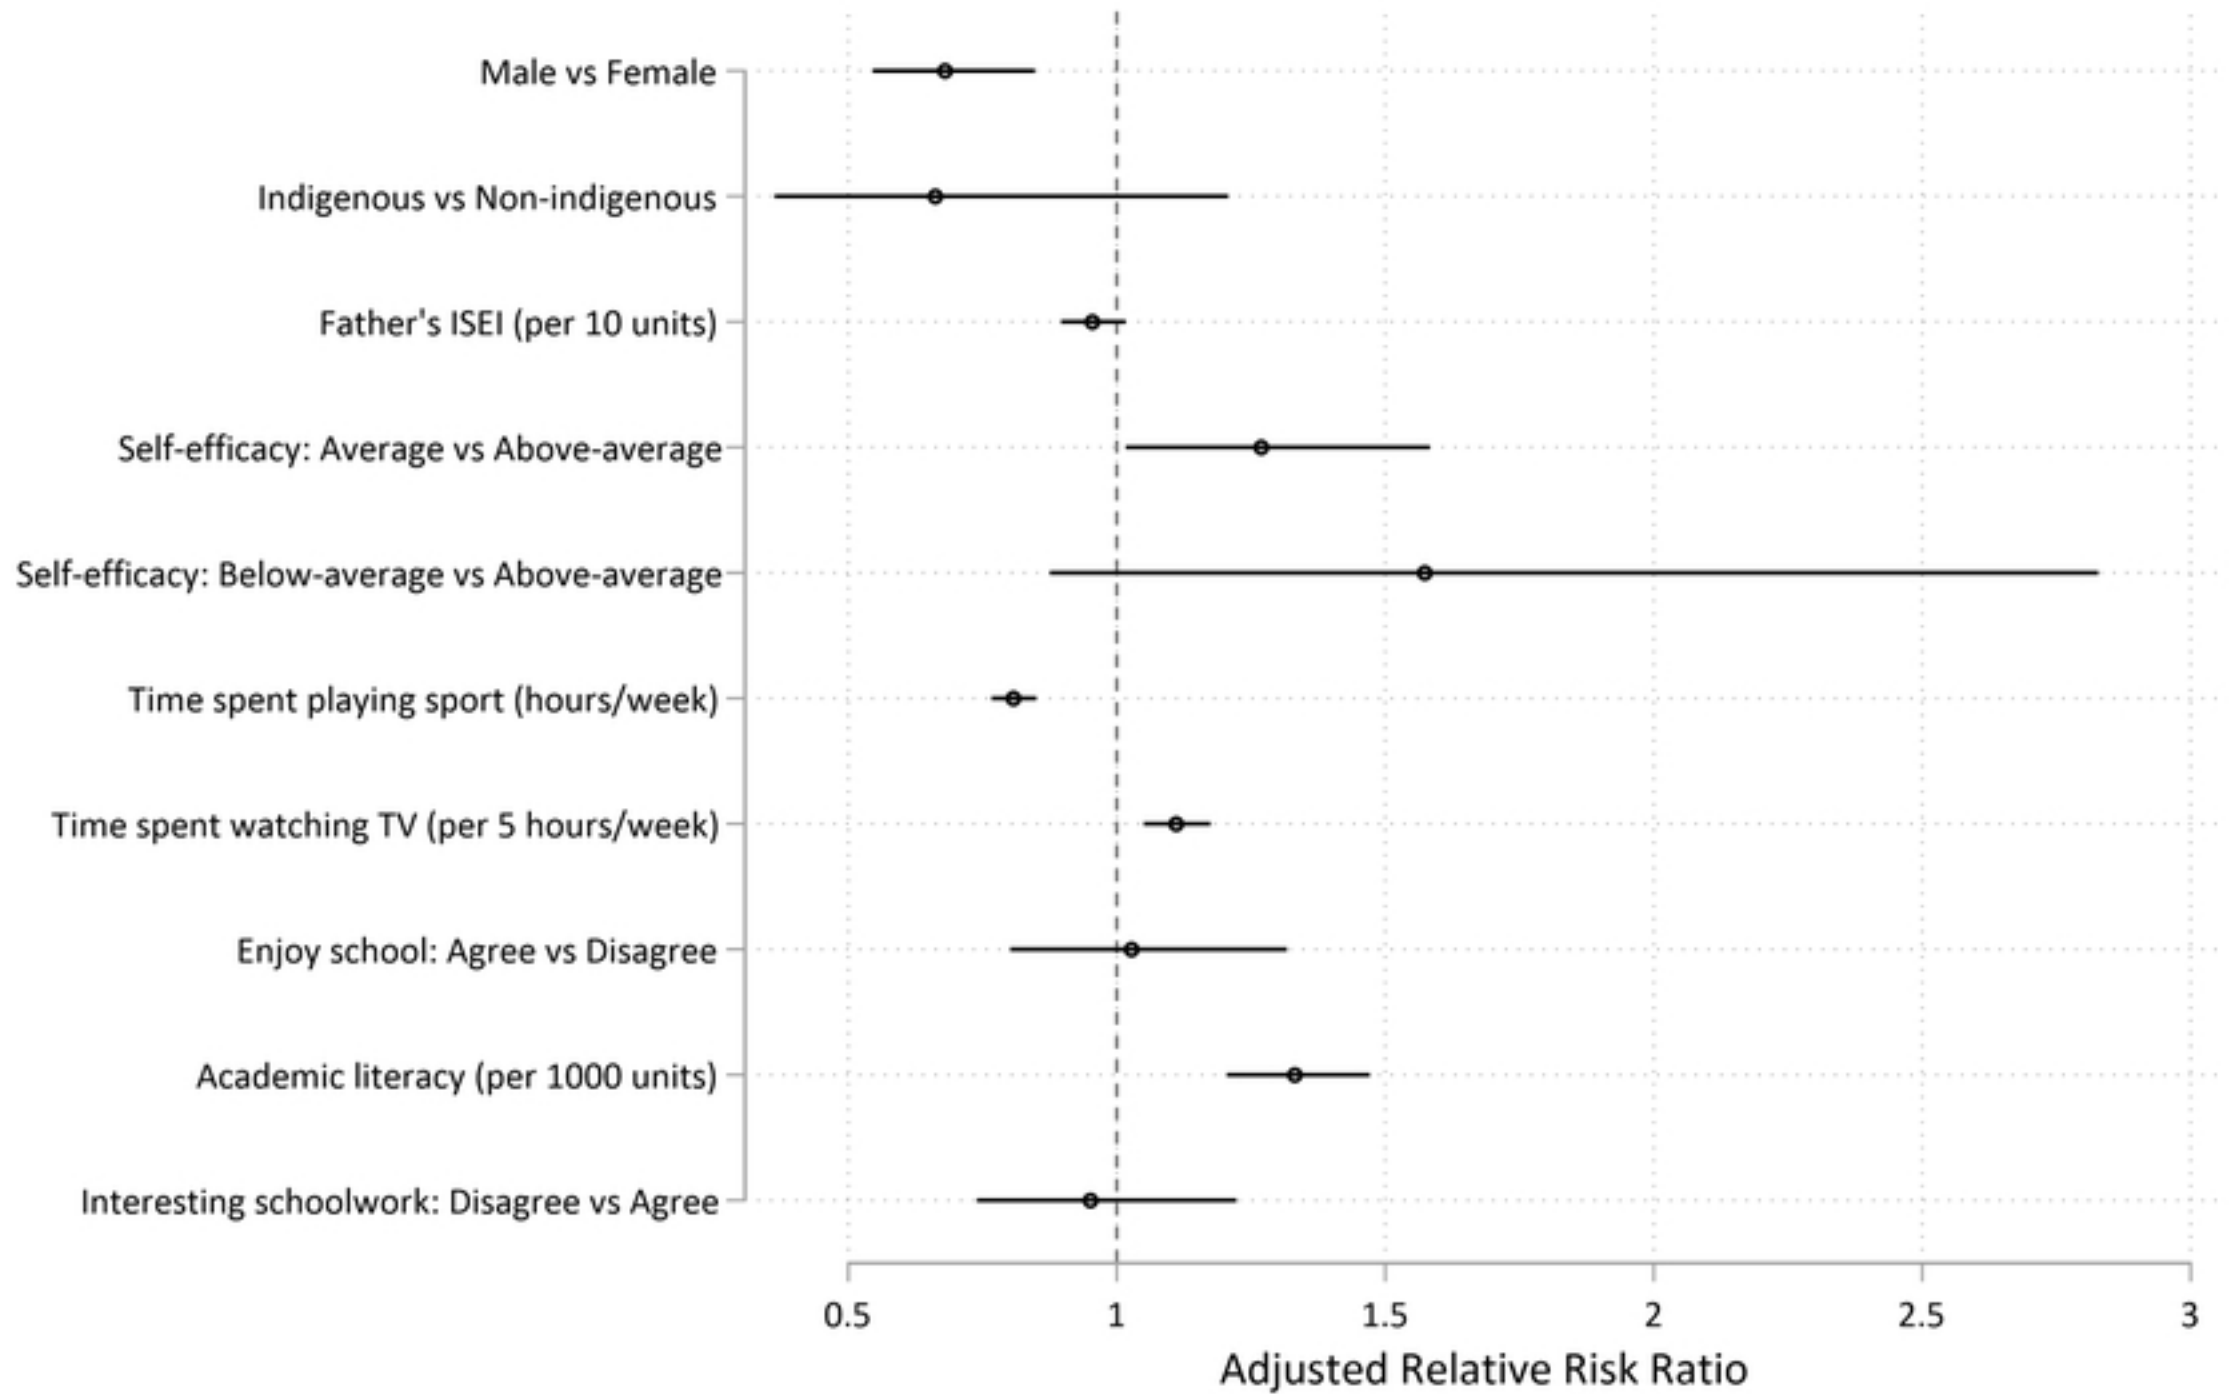

Figure 8

# Self-reported general health

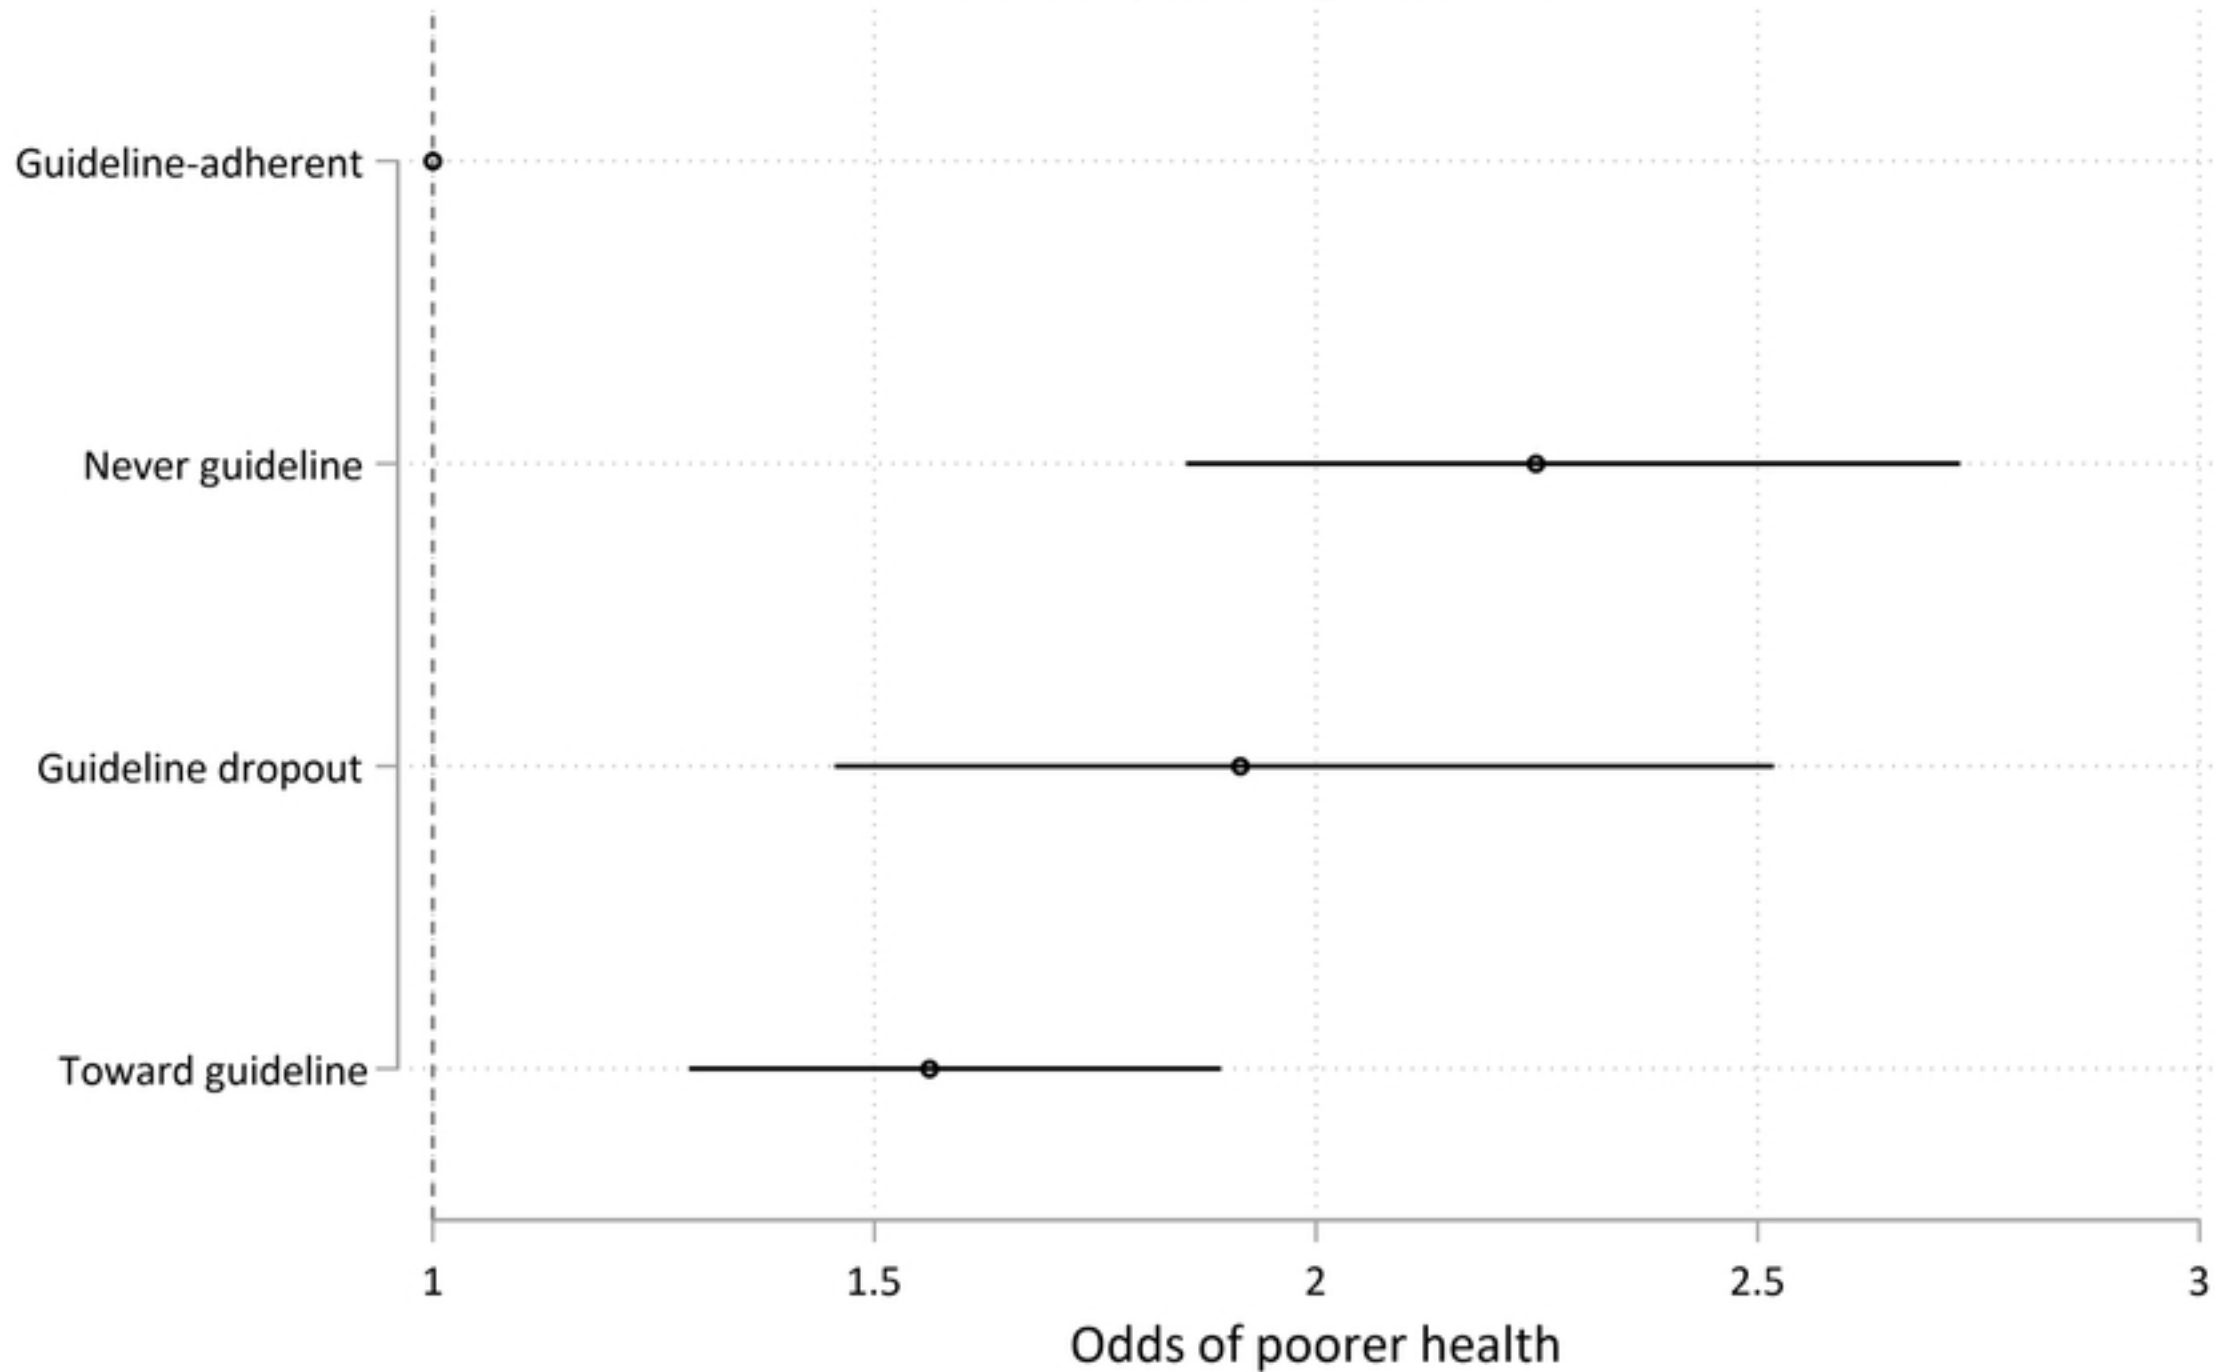

Figure 9



# Probable serious mental illness

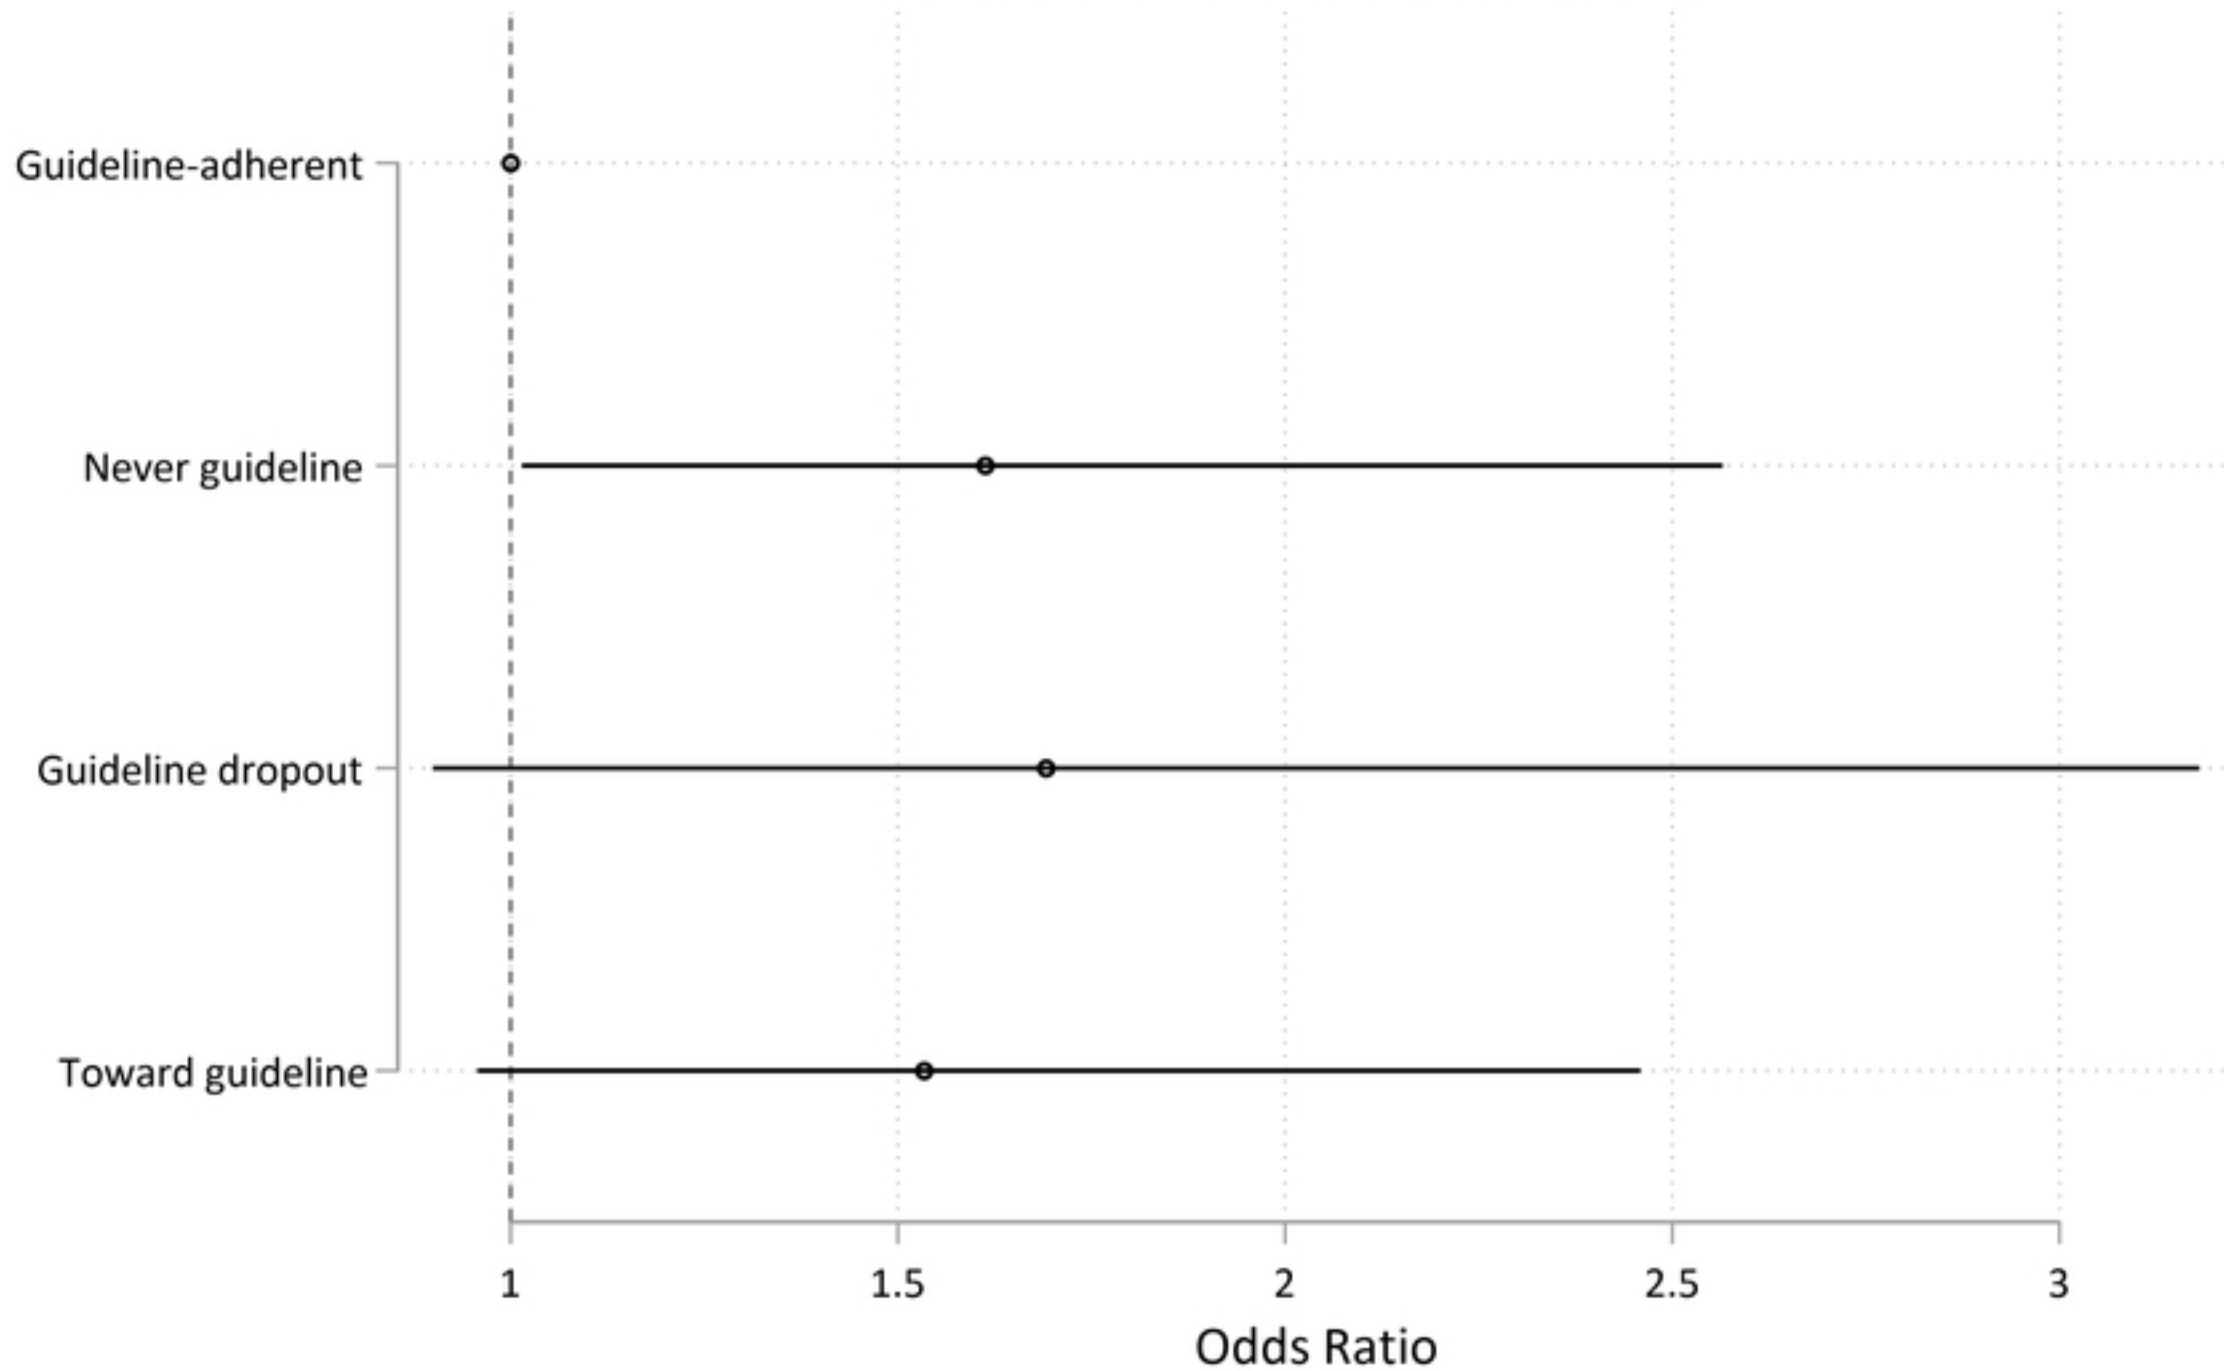

Figure 10

# Happy with life overall

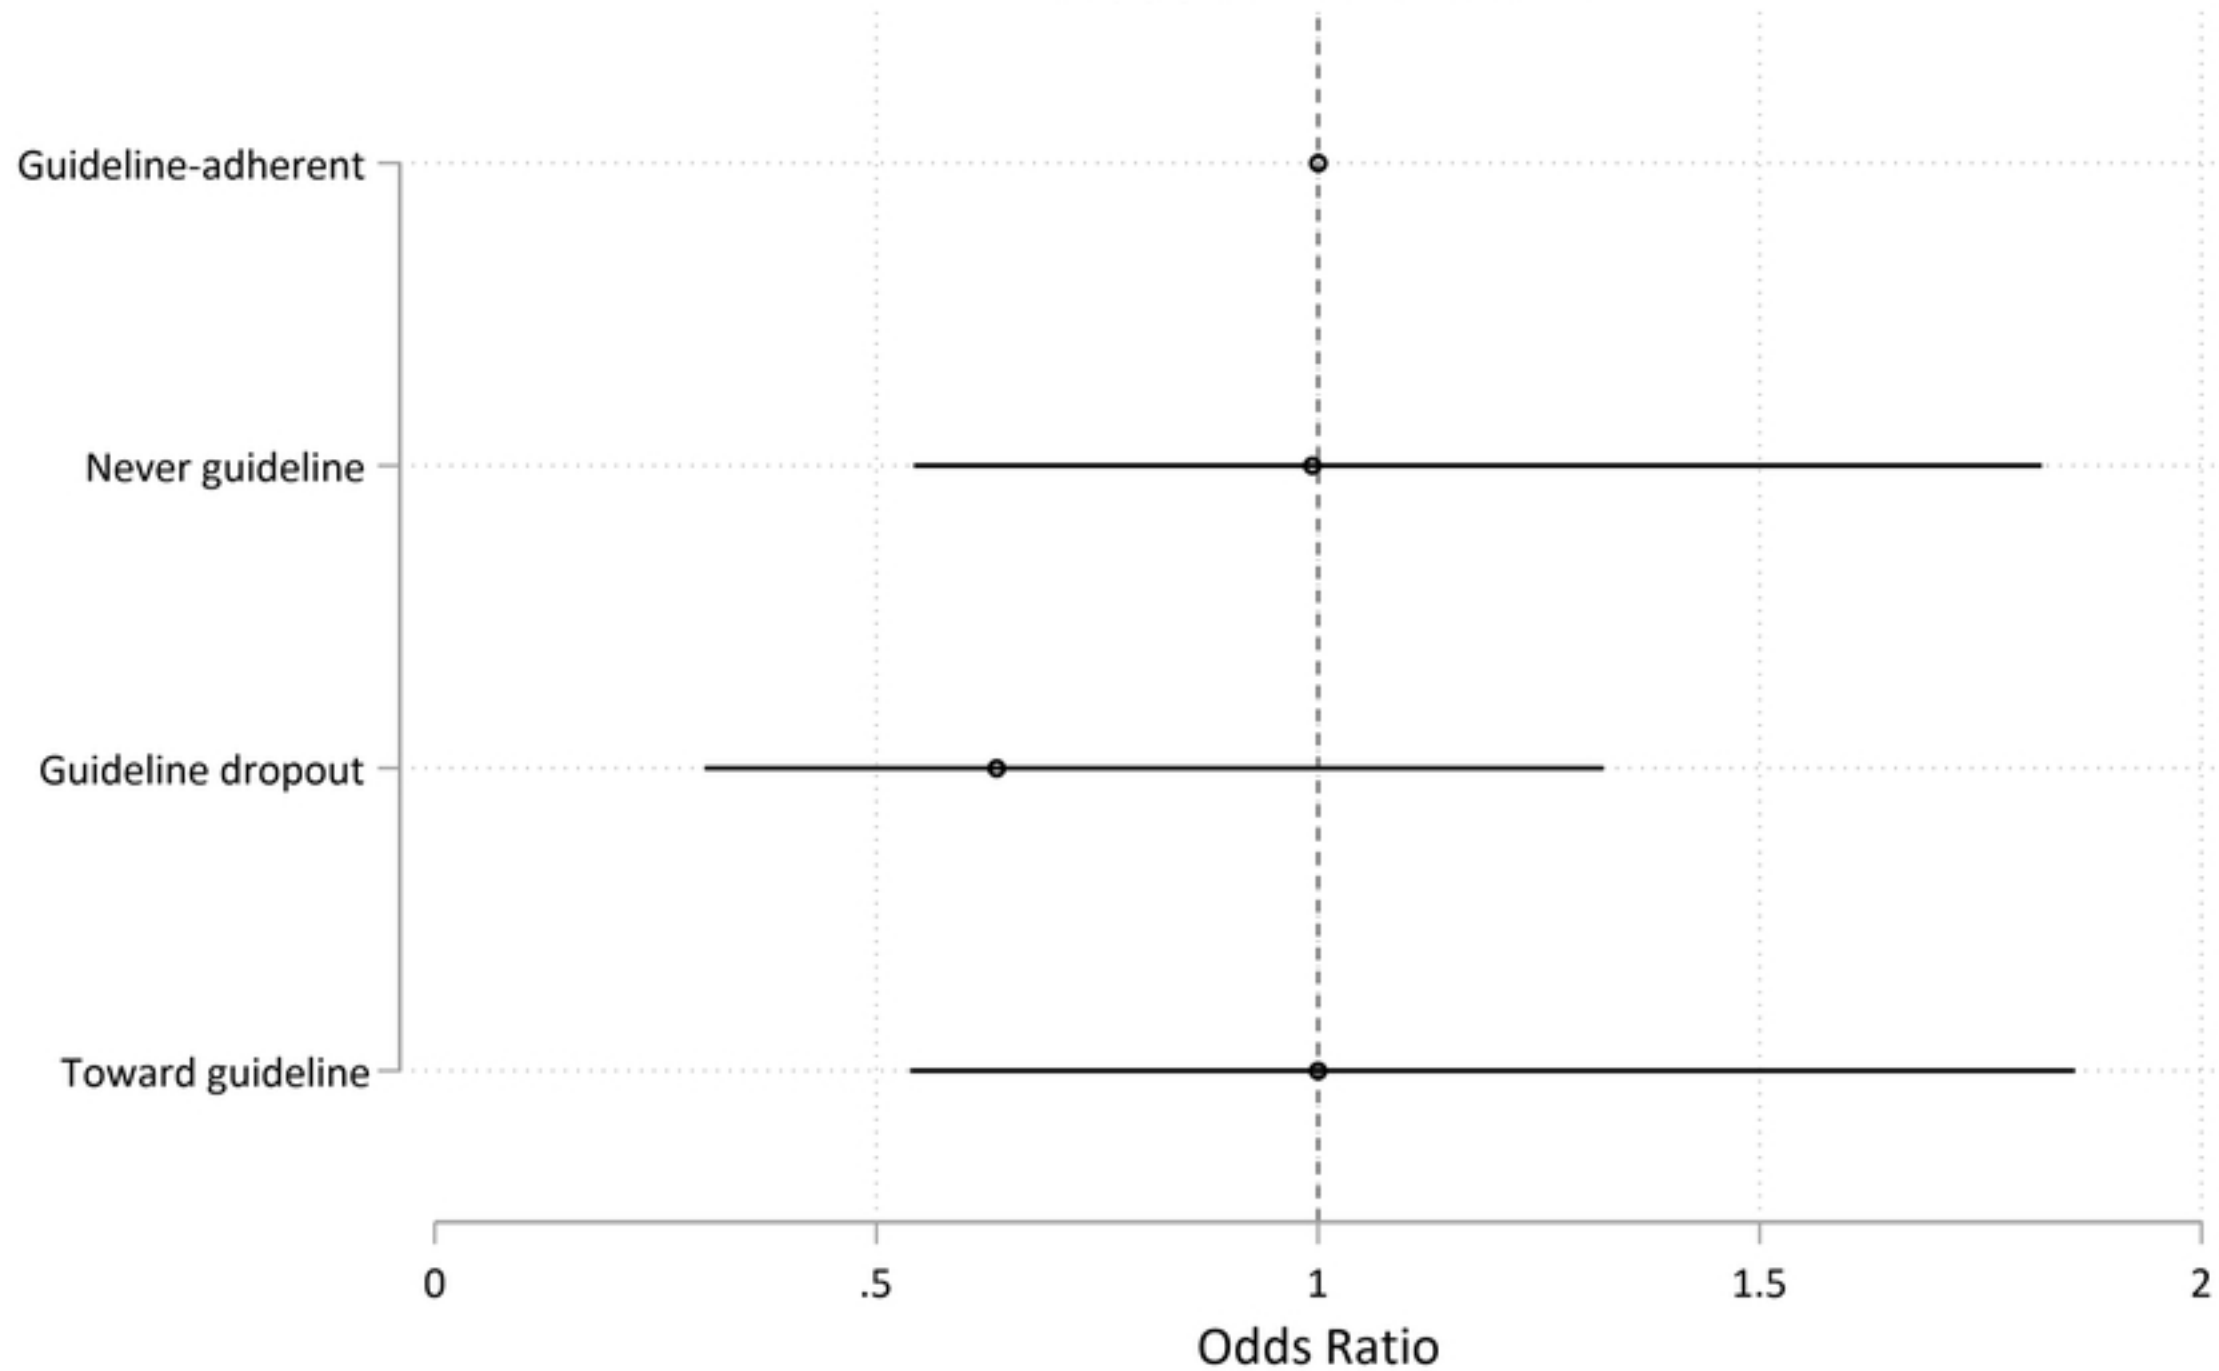

Figure 11

# Happy with future

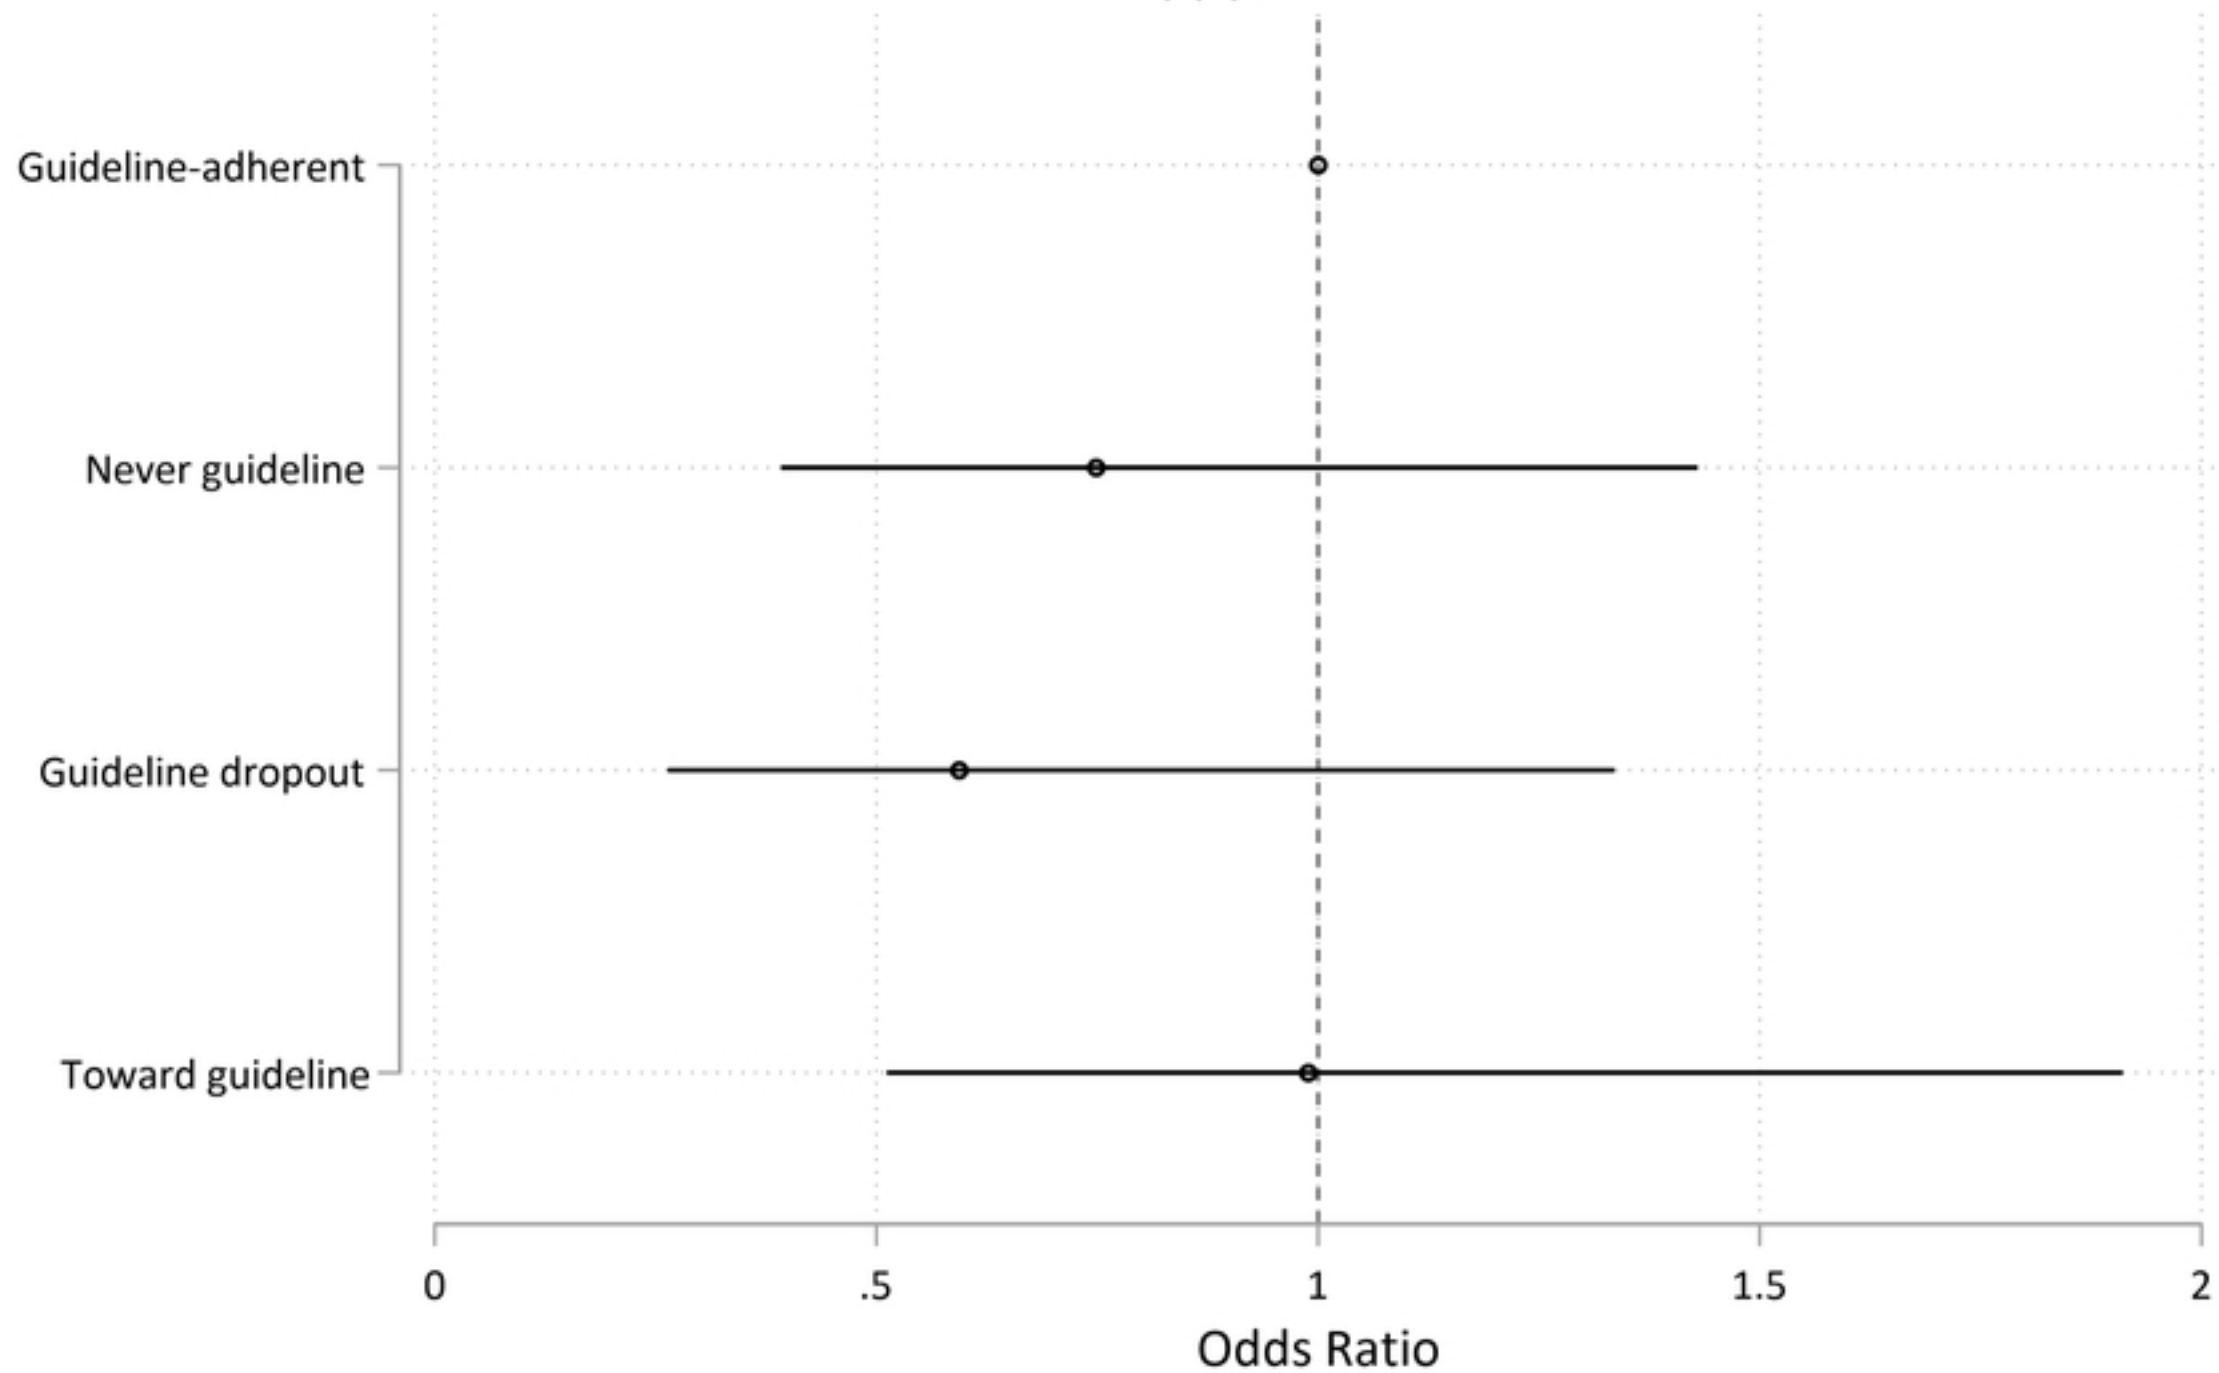

Figure 12

# Completion of Year 12 or higher

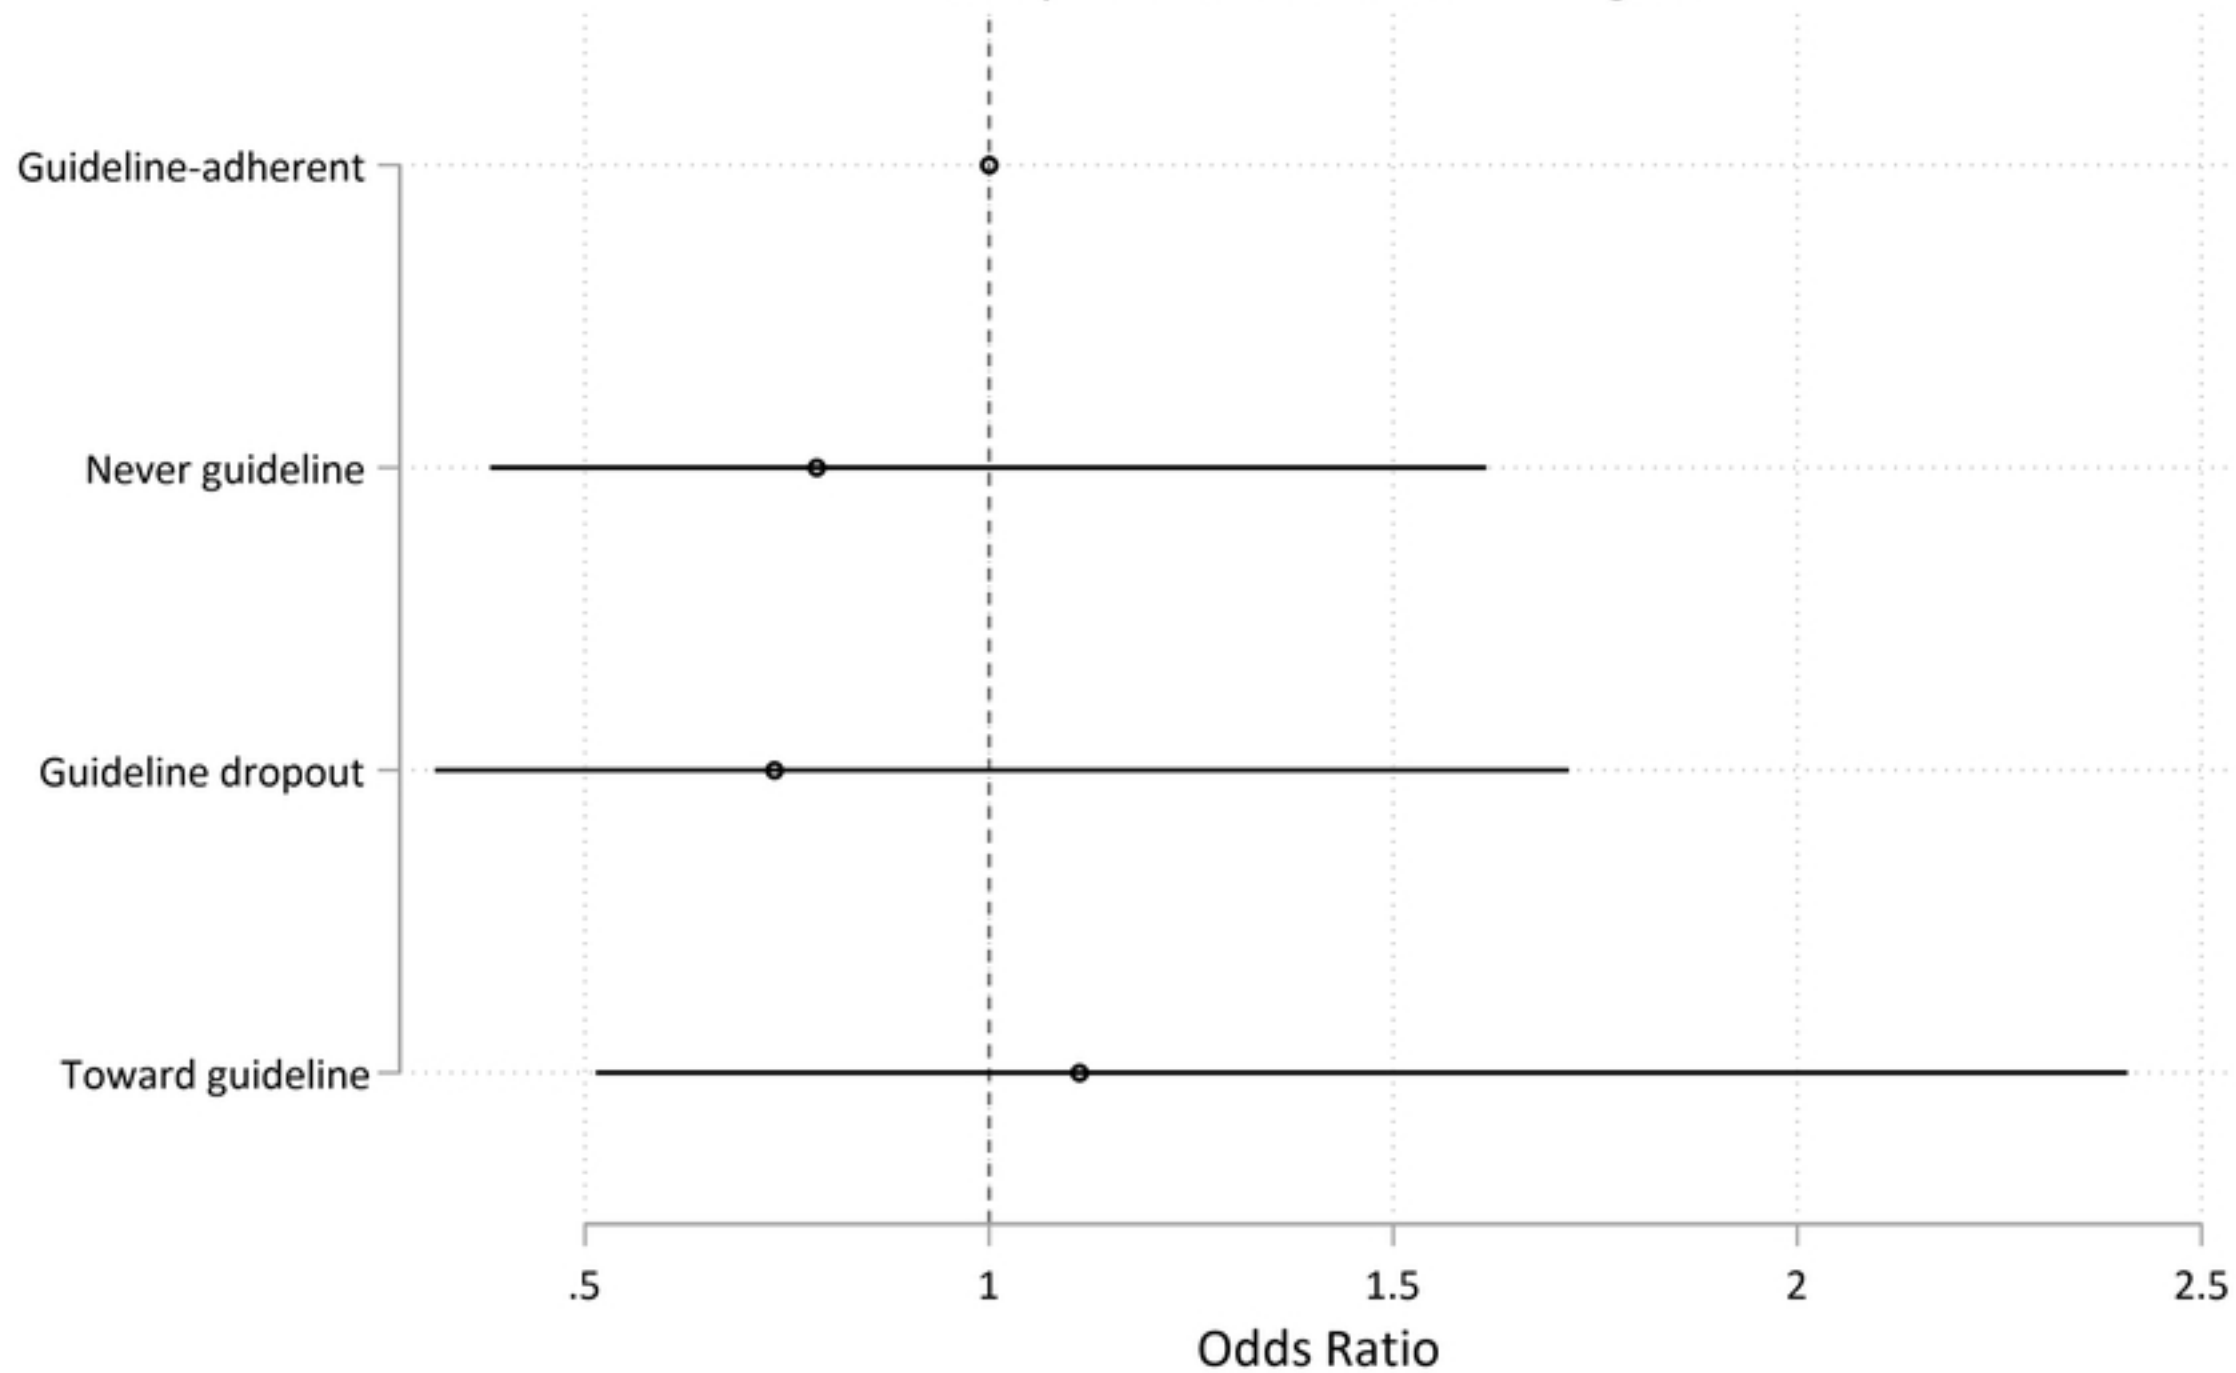

Figure 13

# Attained post-school qualification

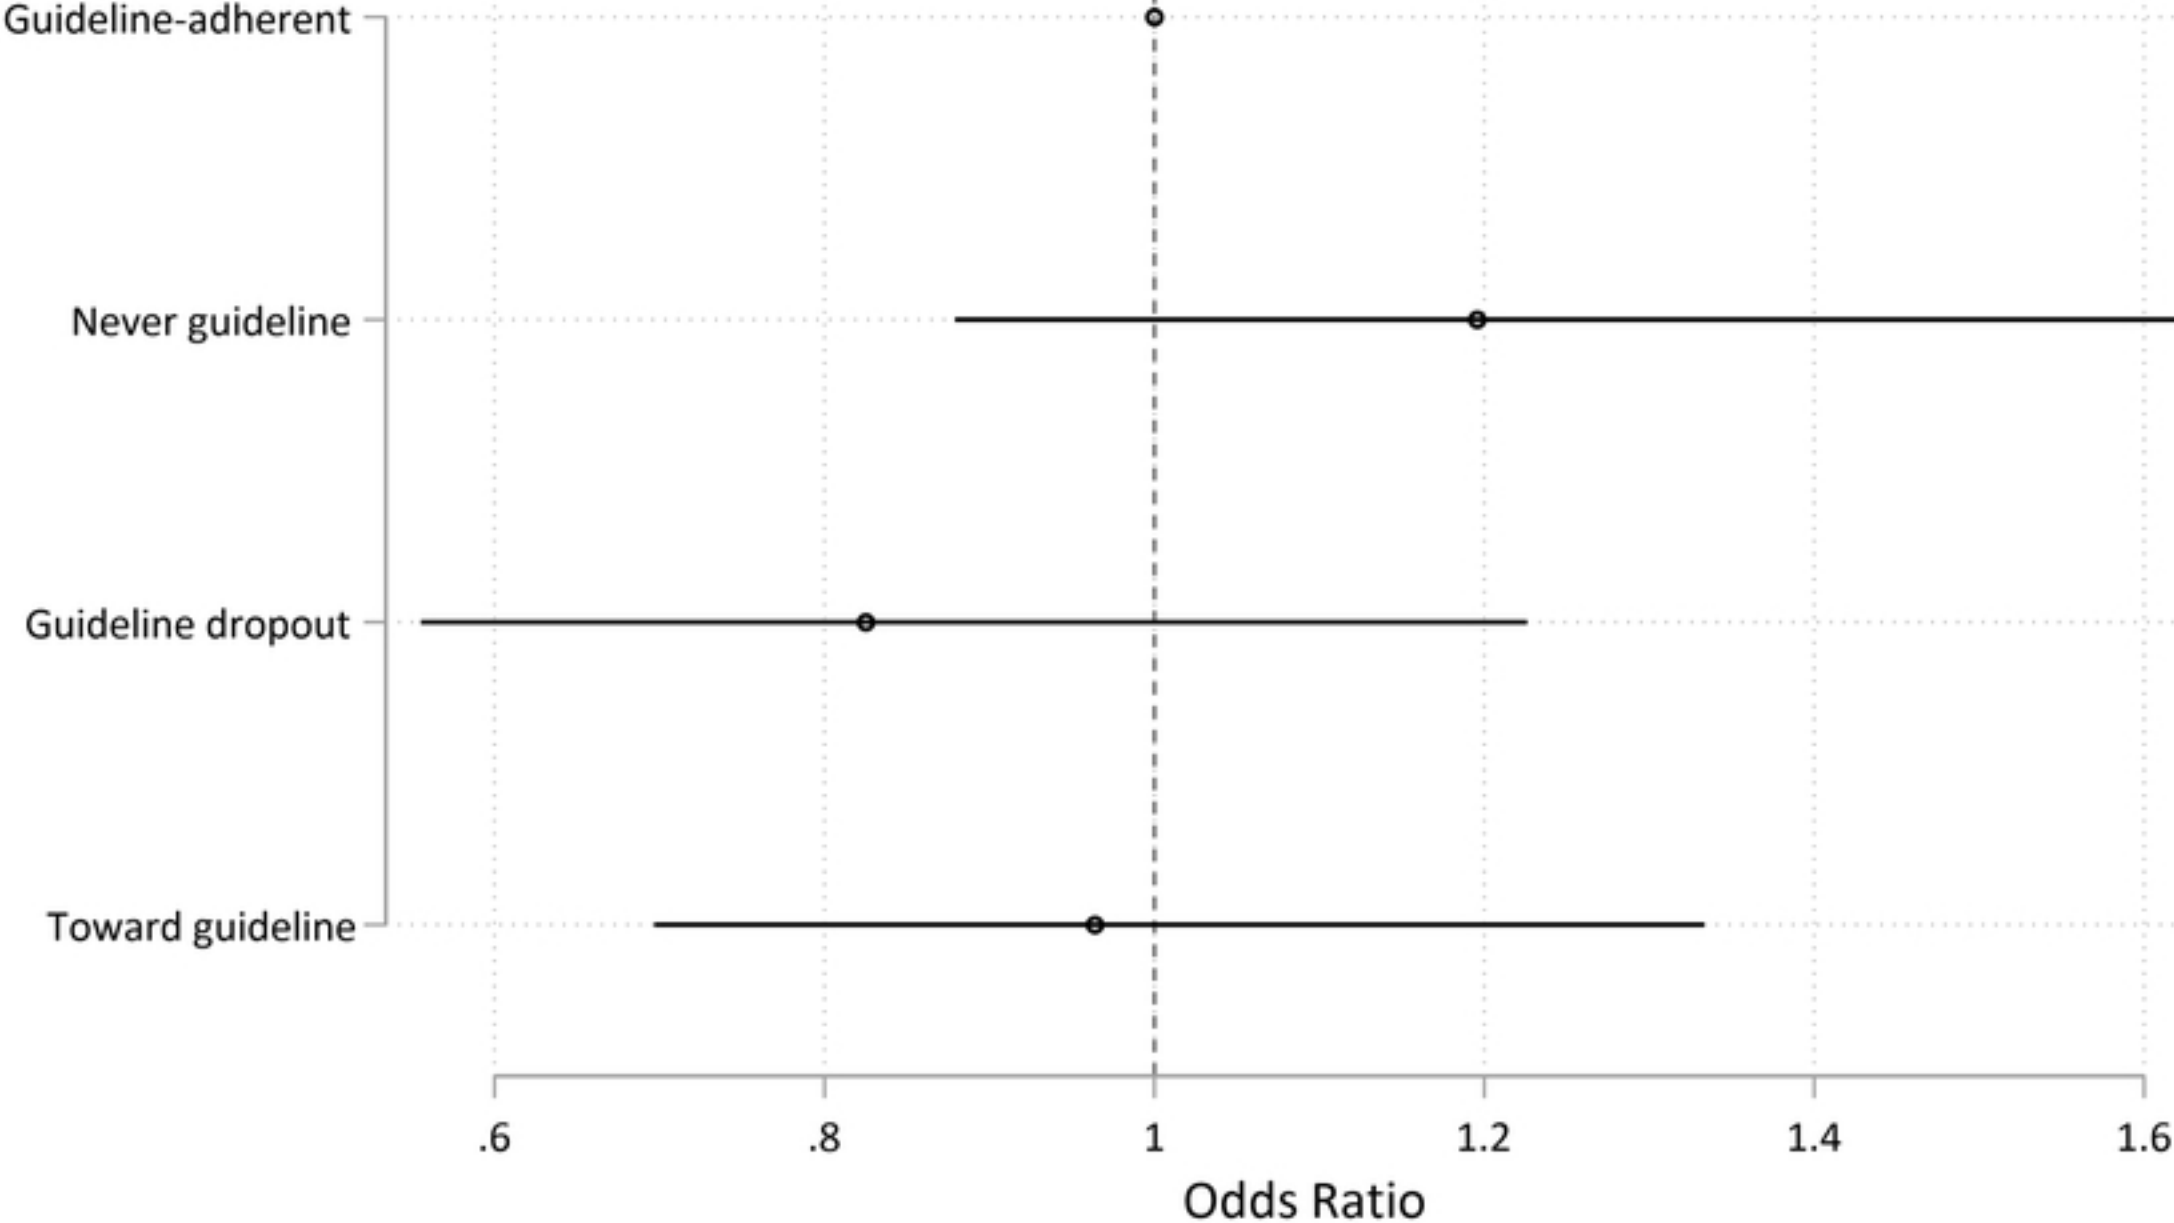

Figure 14

# Participation in labour force

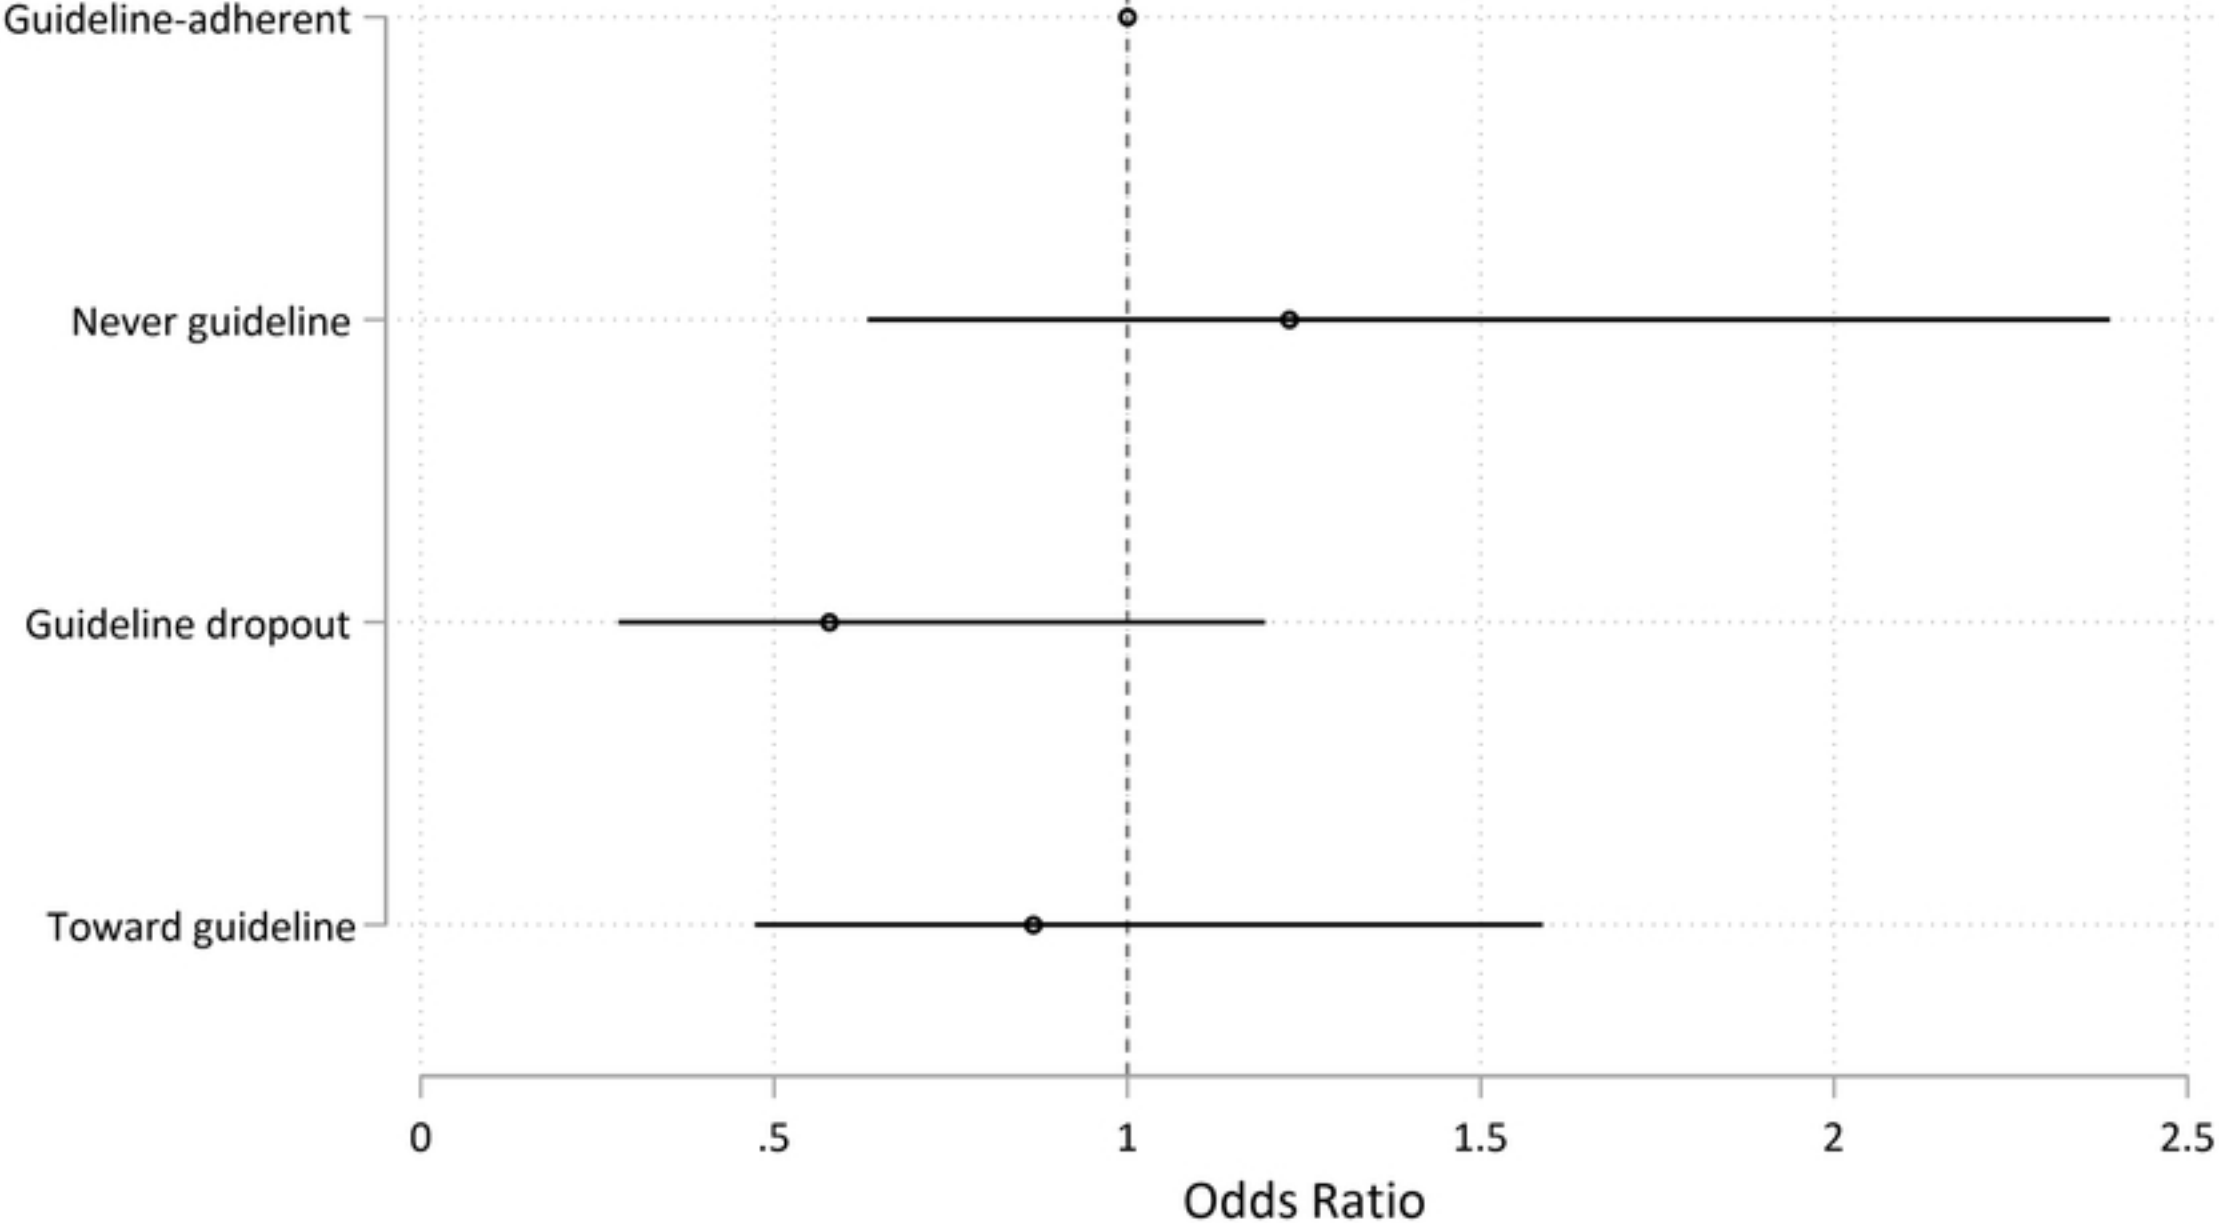

Figure 15

# Self-reported general health

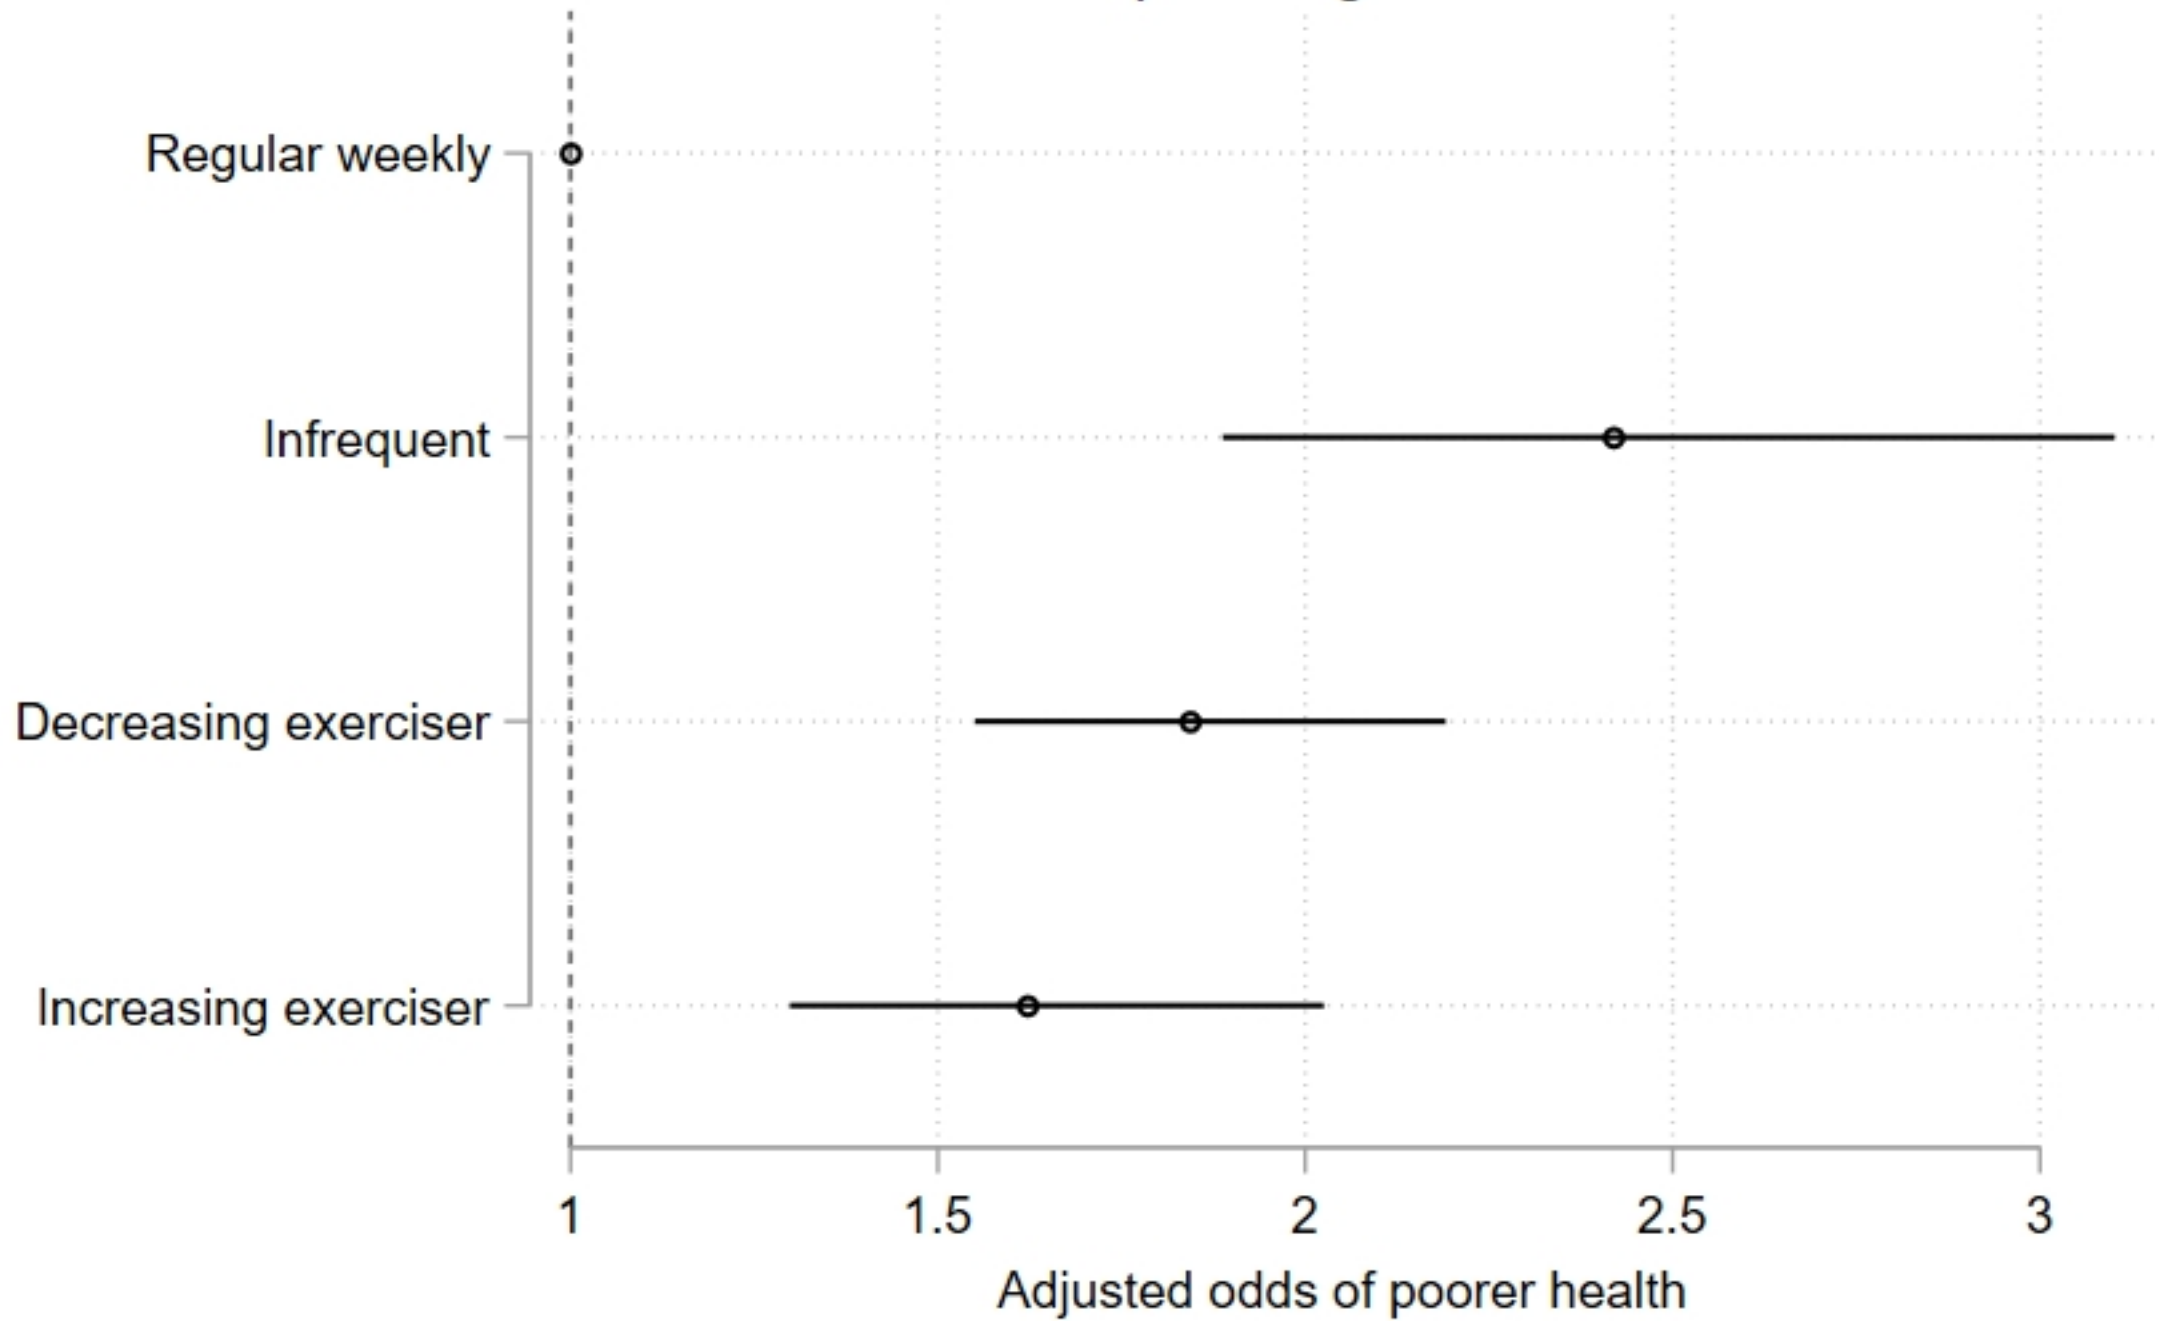

Figure 16

# Mental illness

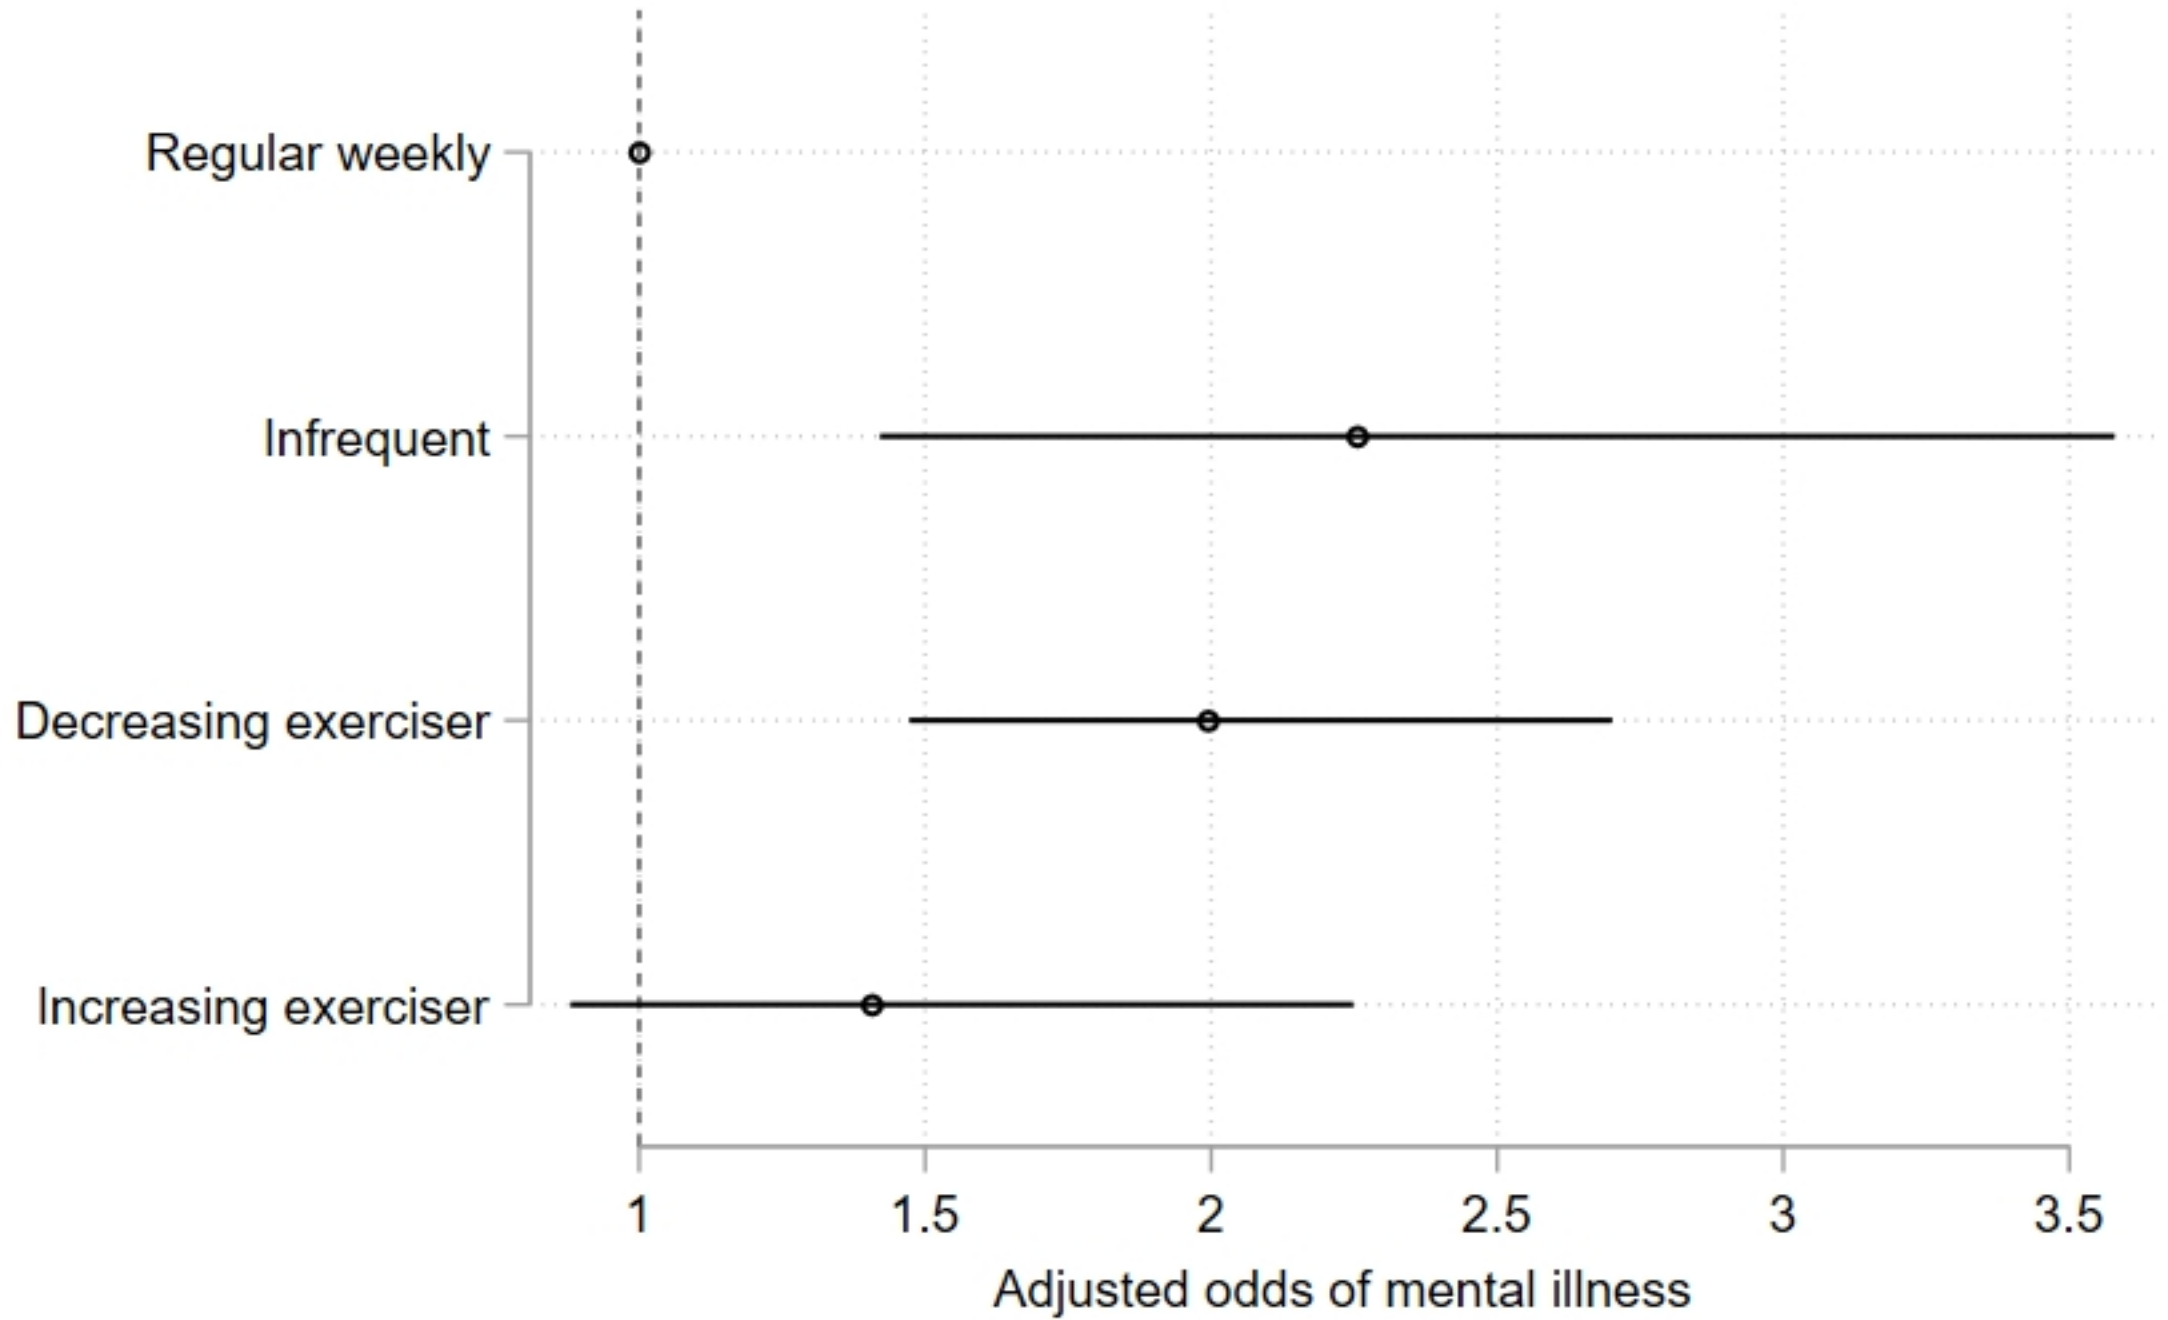

Figure 17



# Happy with future

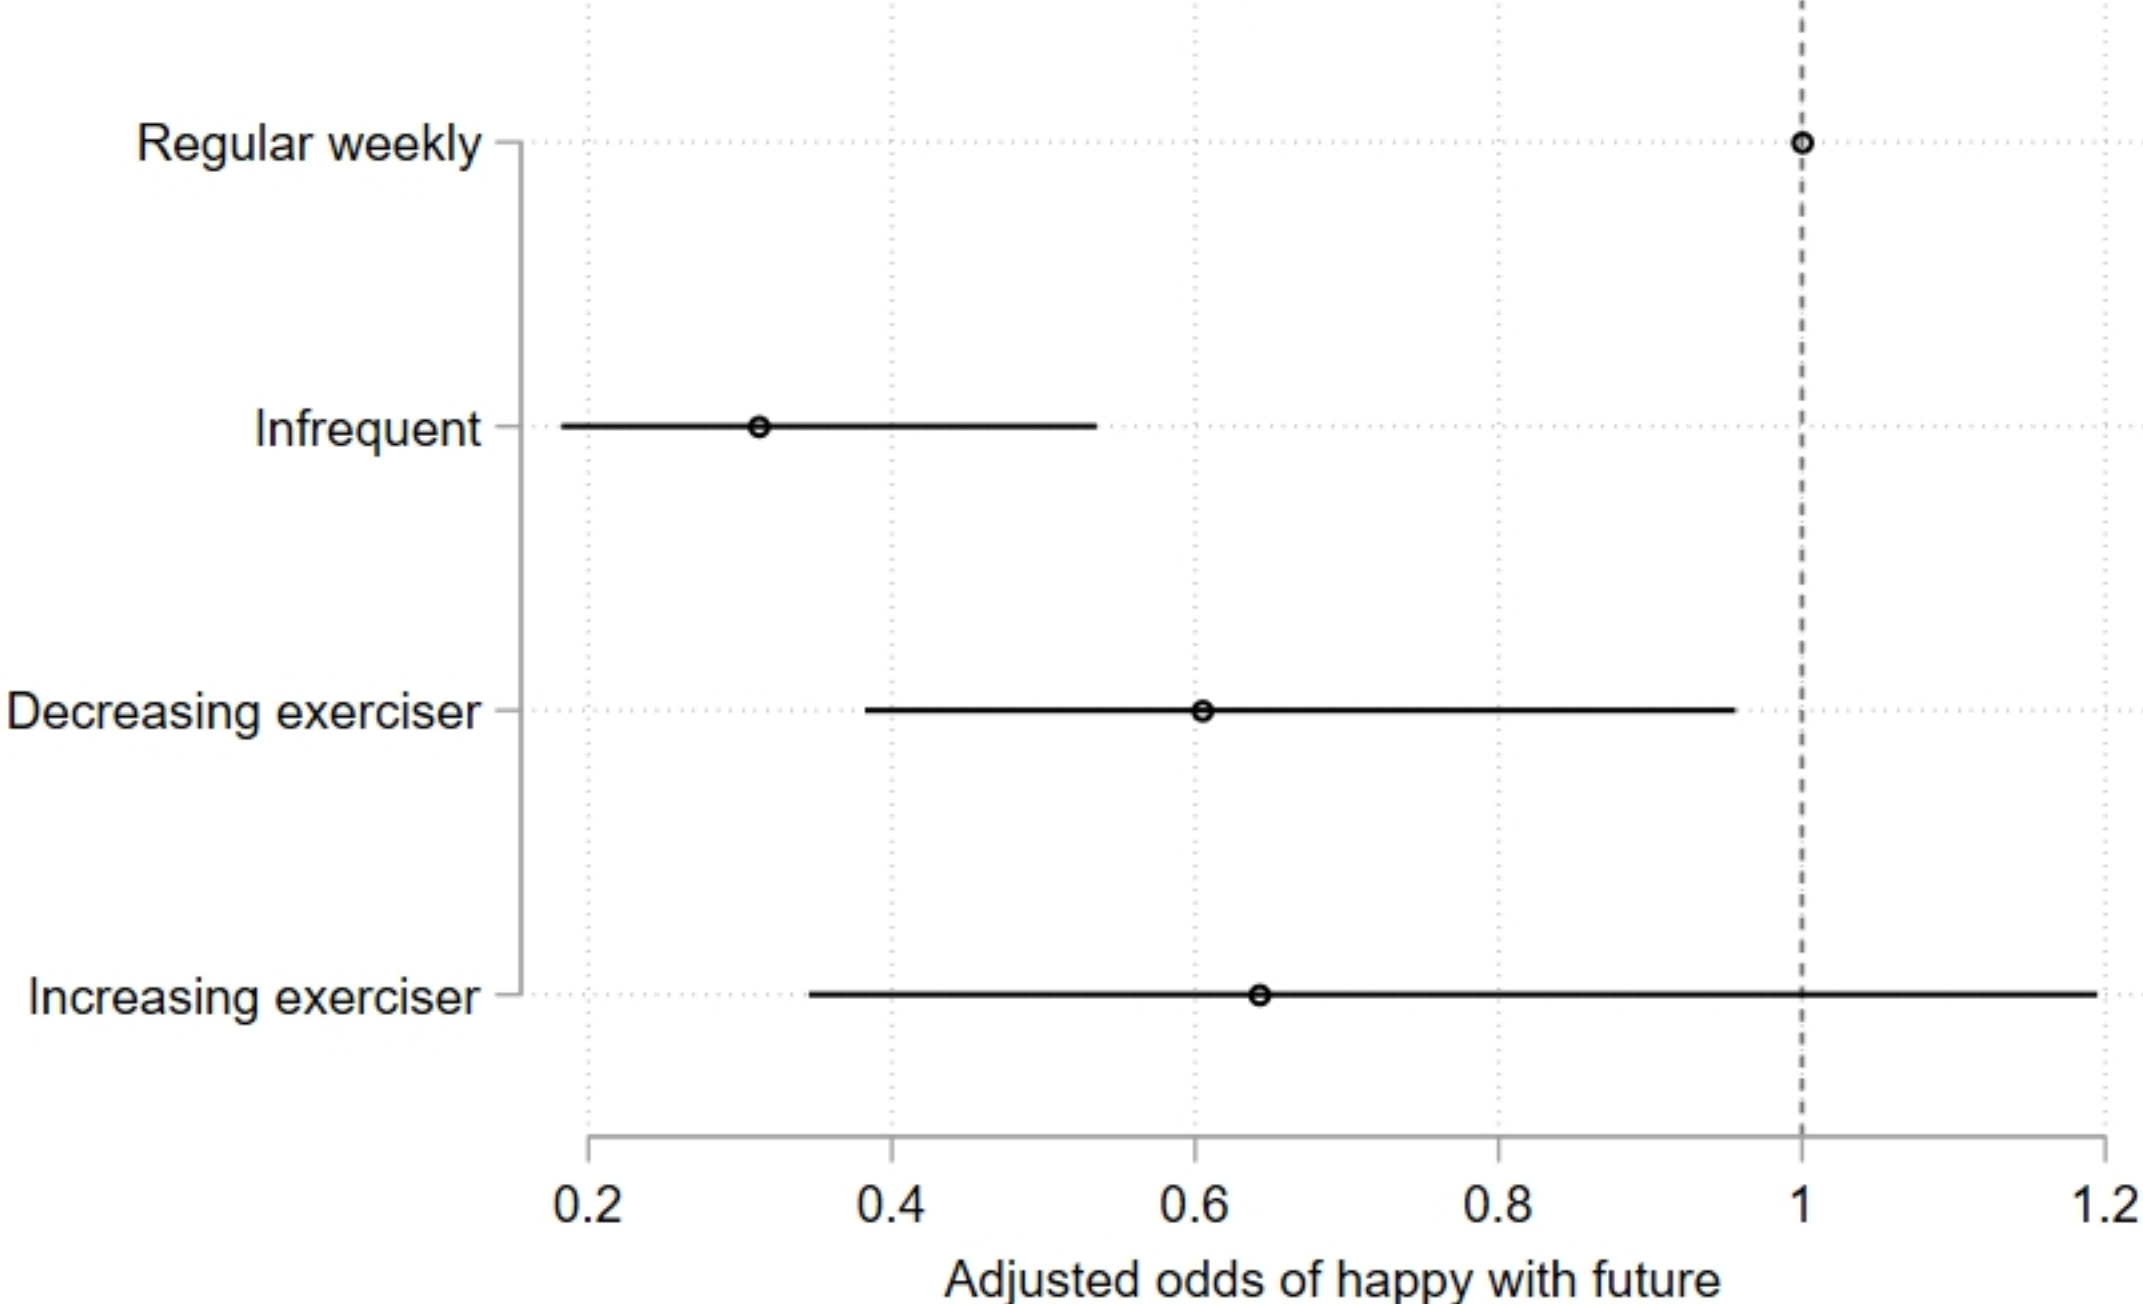

Figure 18

# Happy with life overall

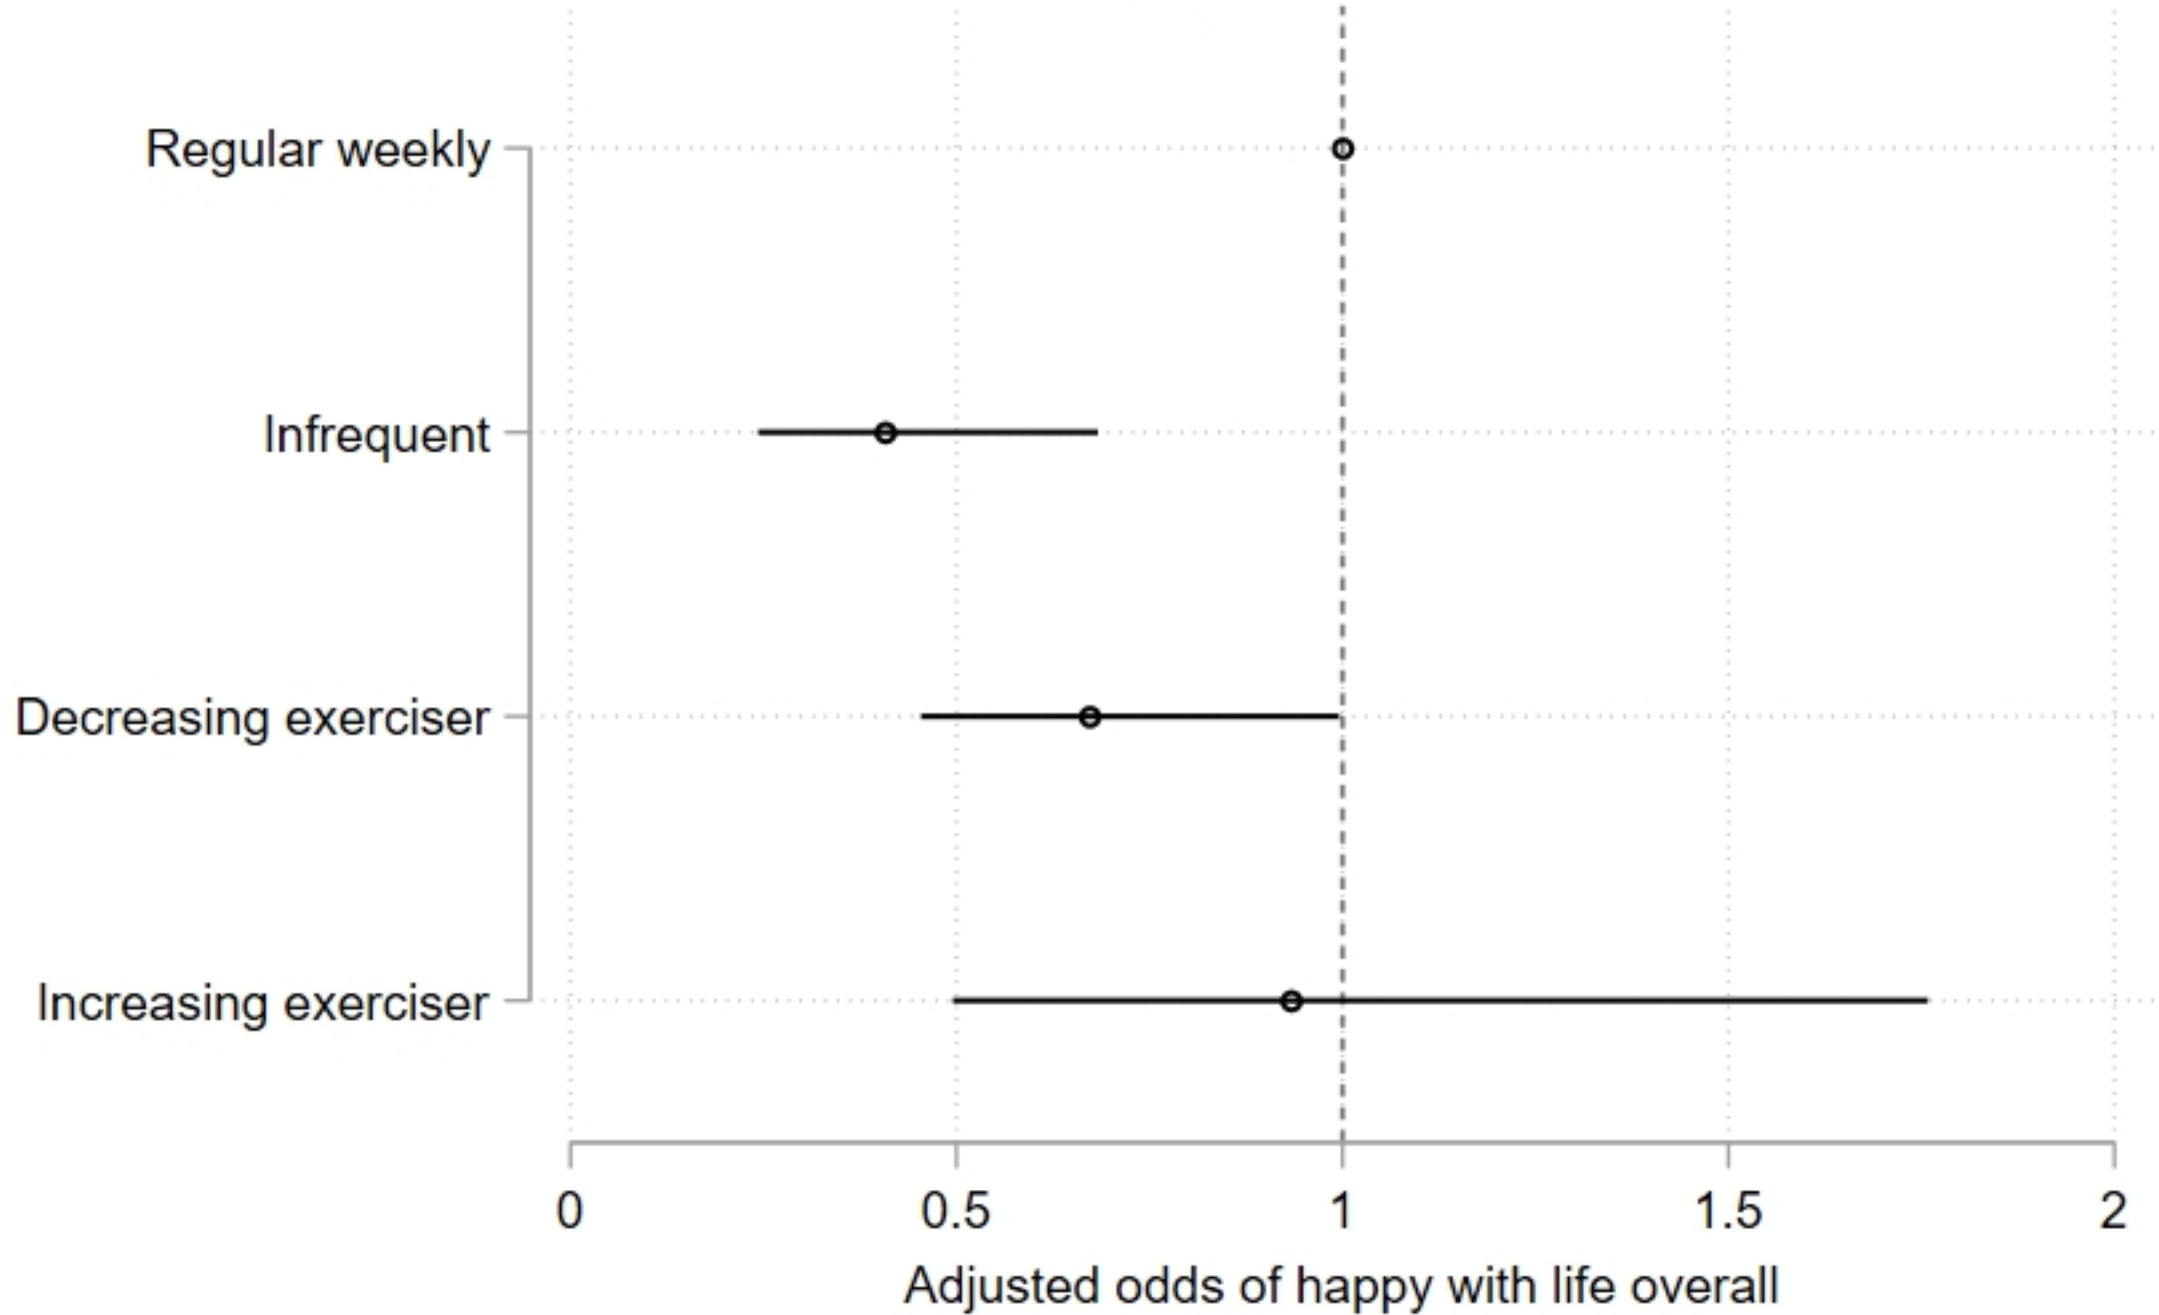

Figure 19

# Completion of Year 12 or higher

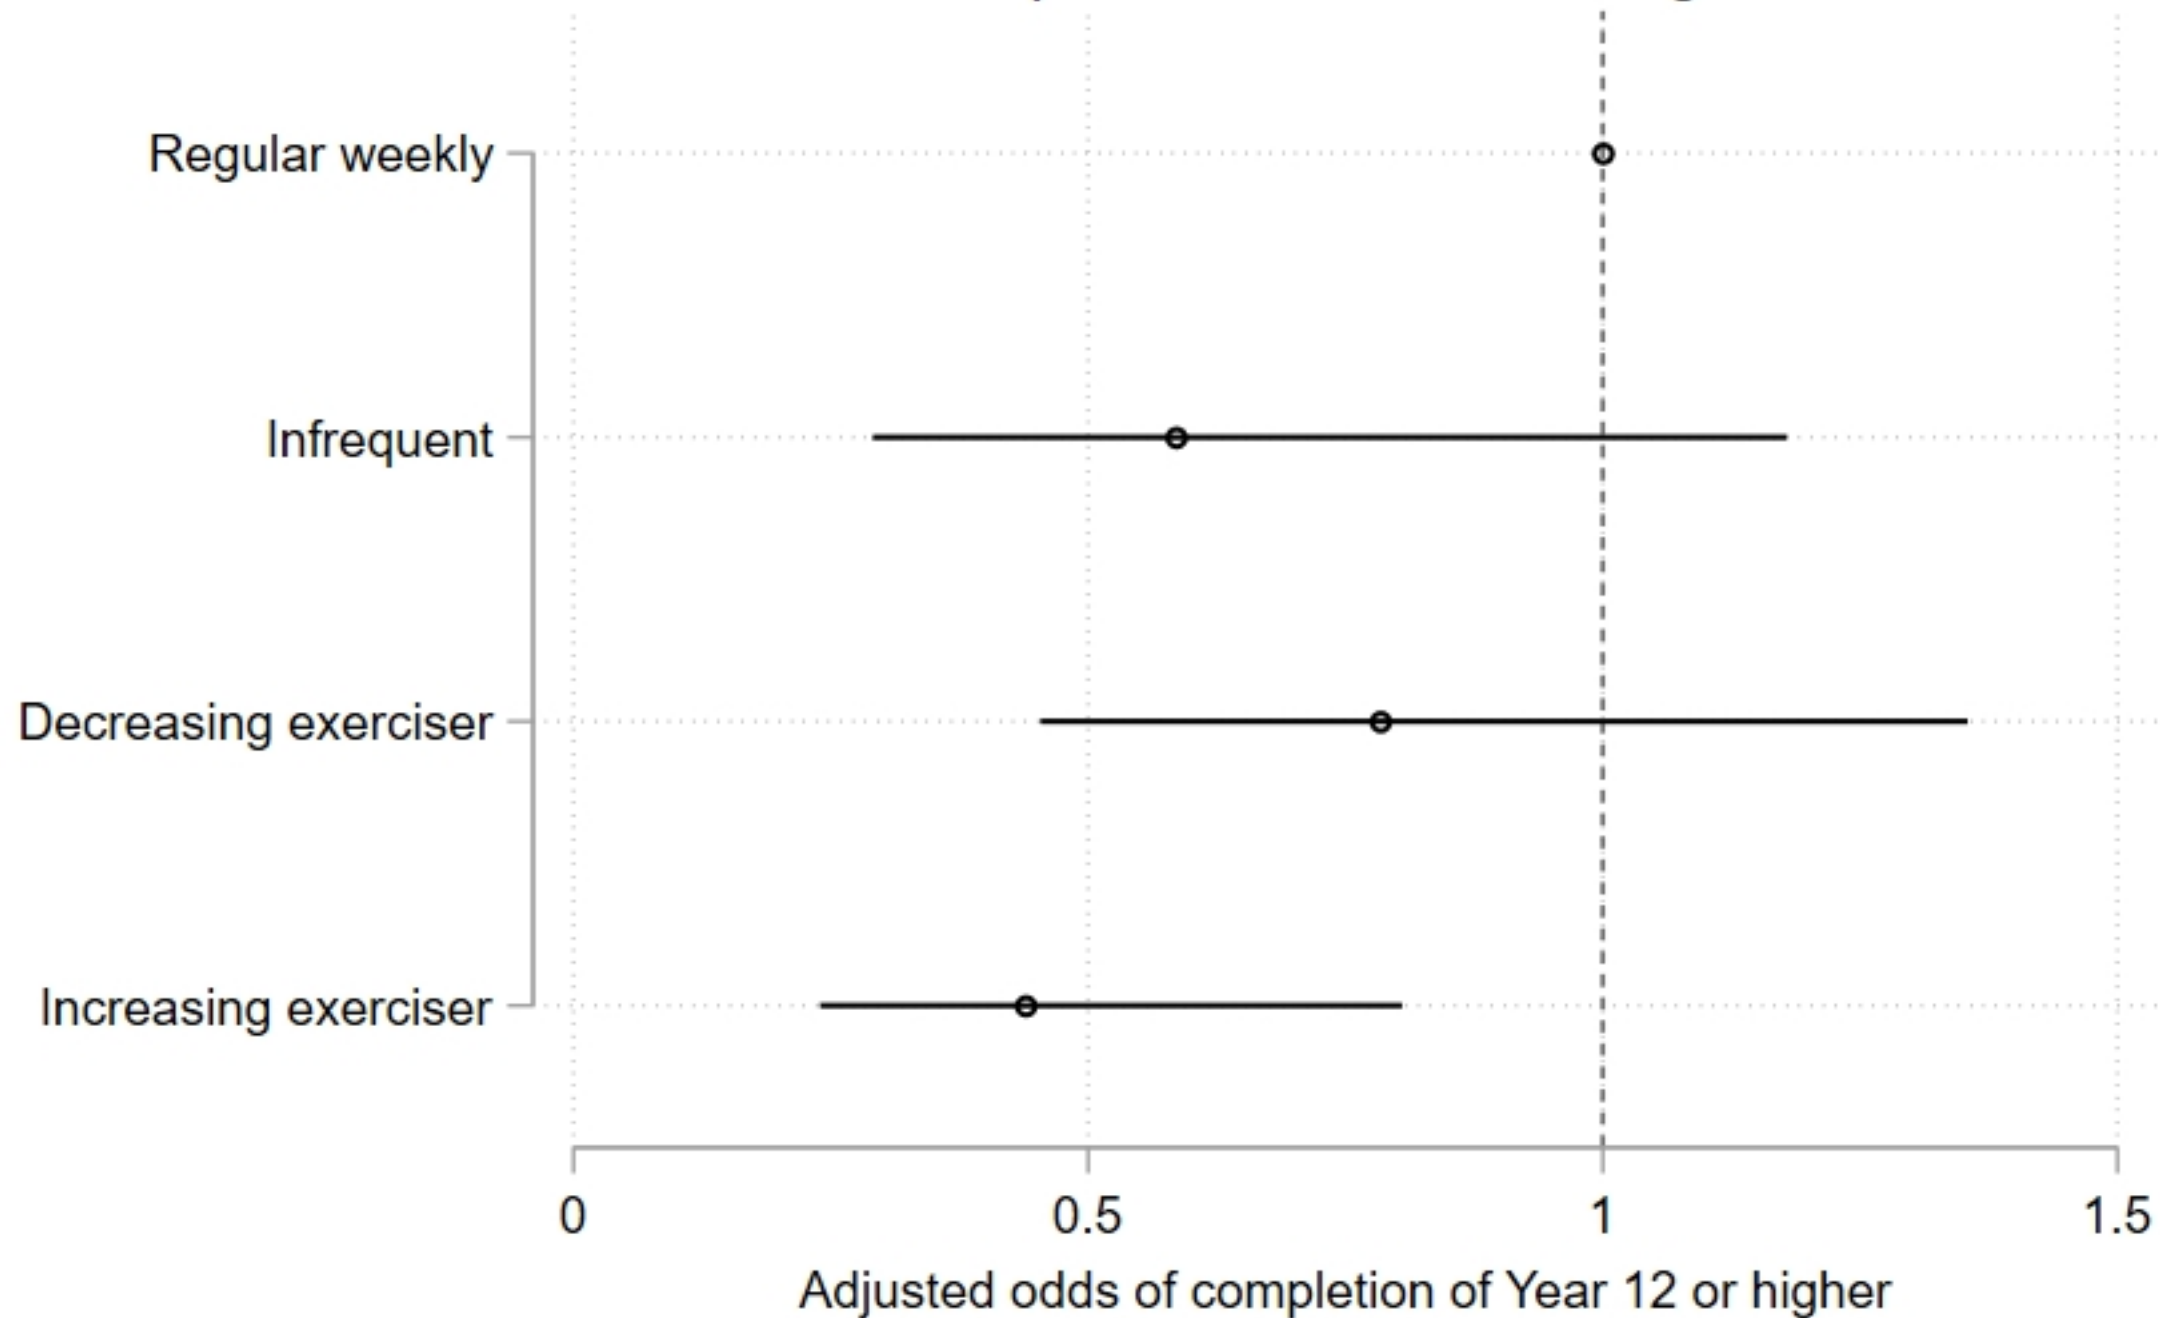

Figure 20

# Attained post-school qualification

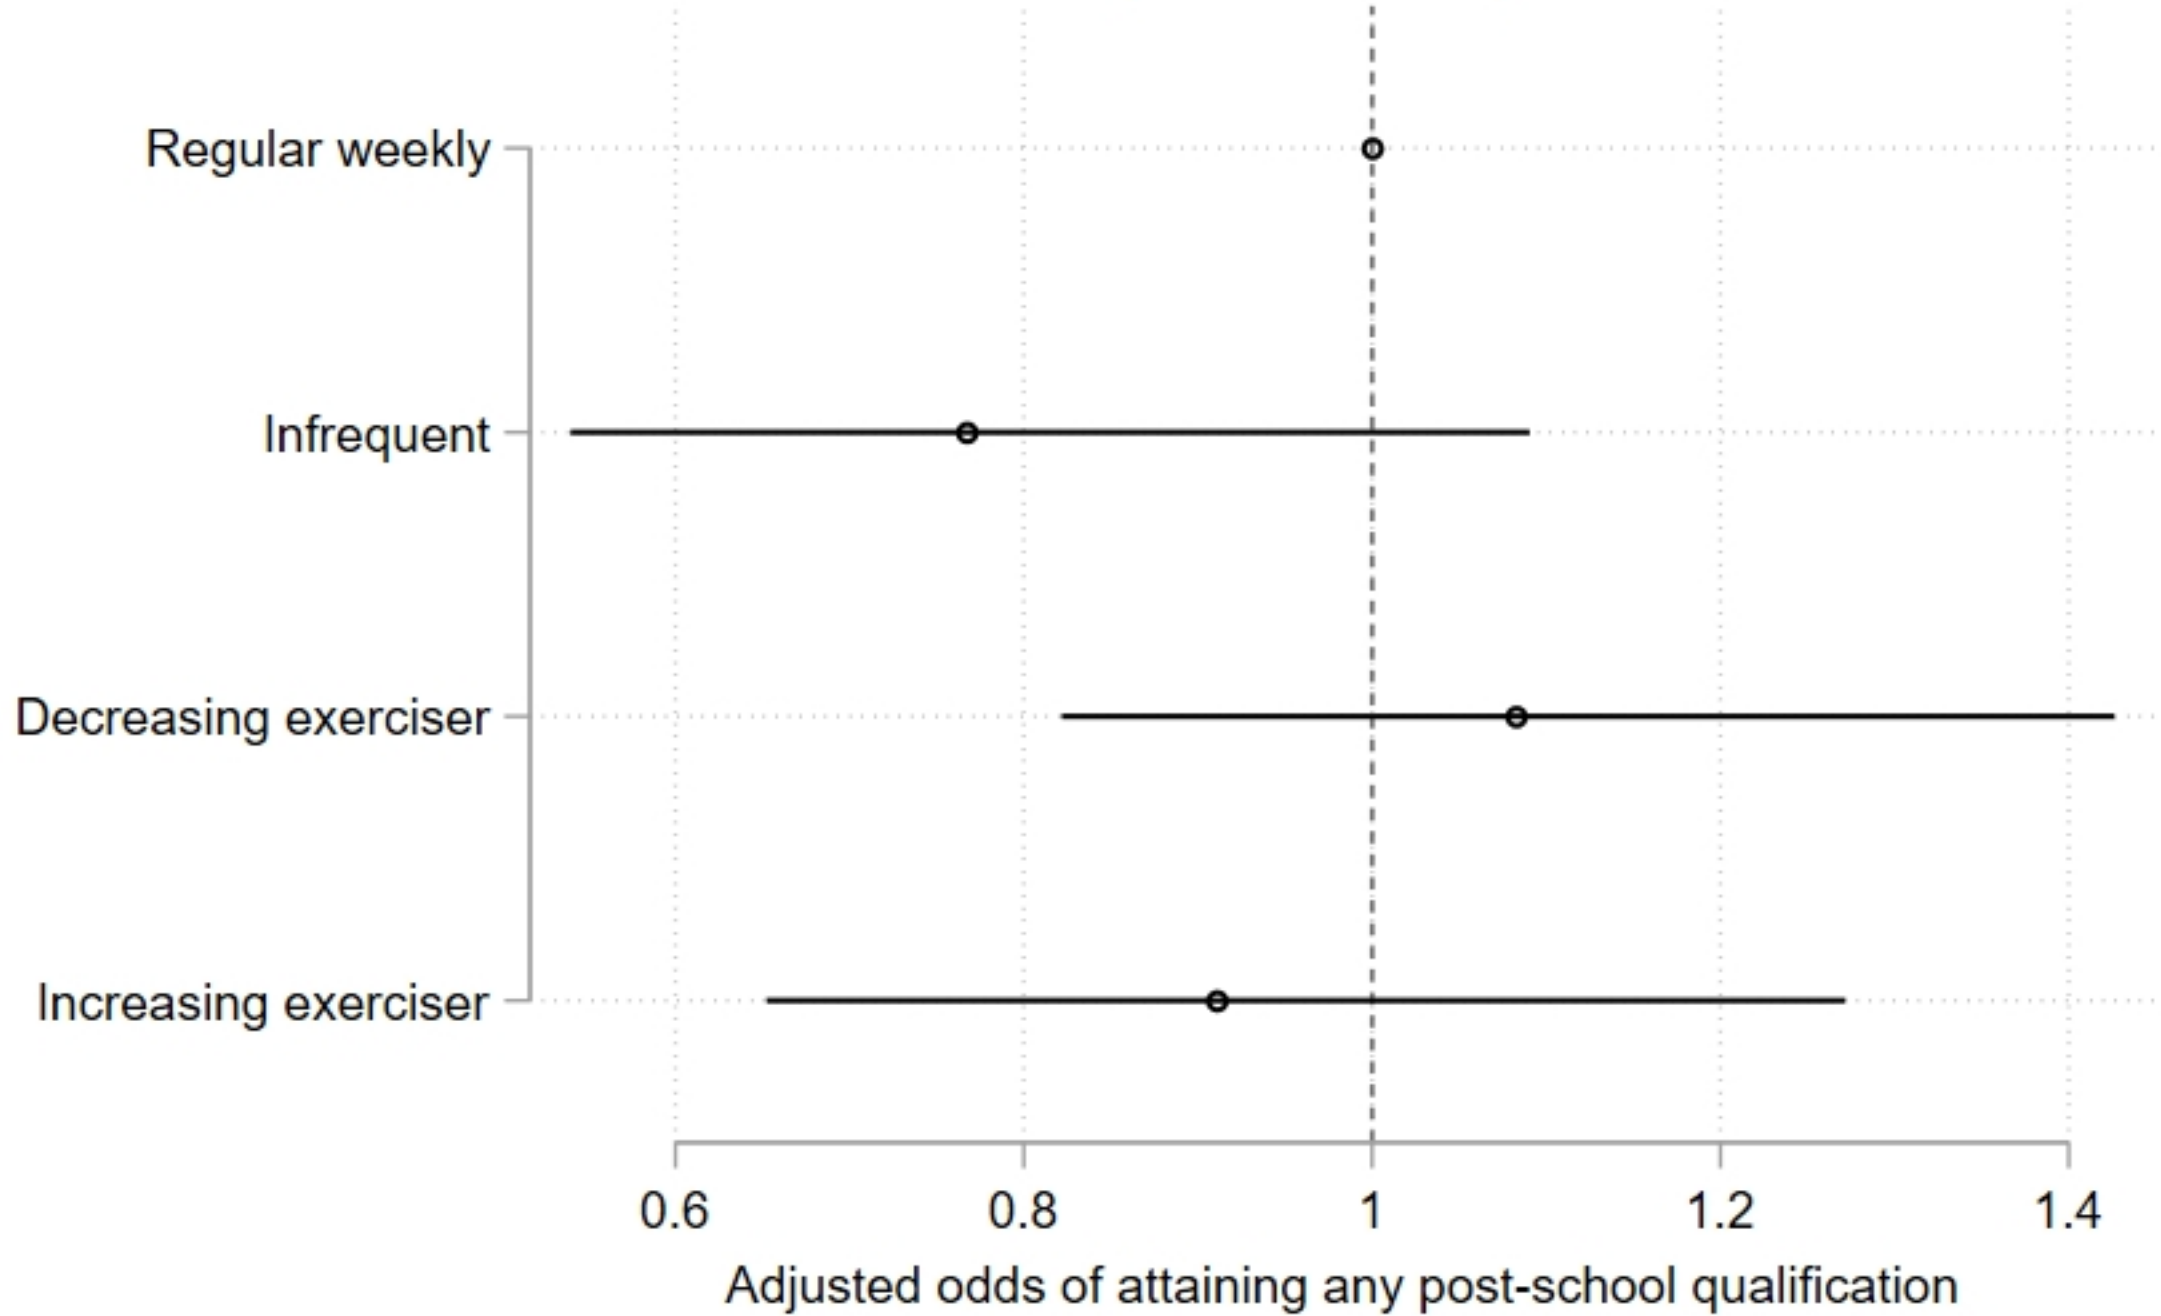

Figure 21

# Participation in labour force

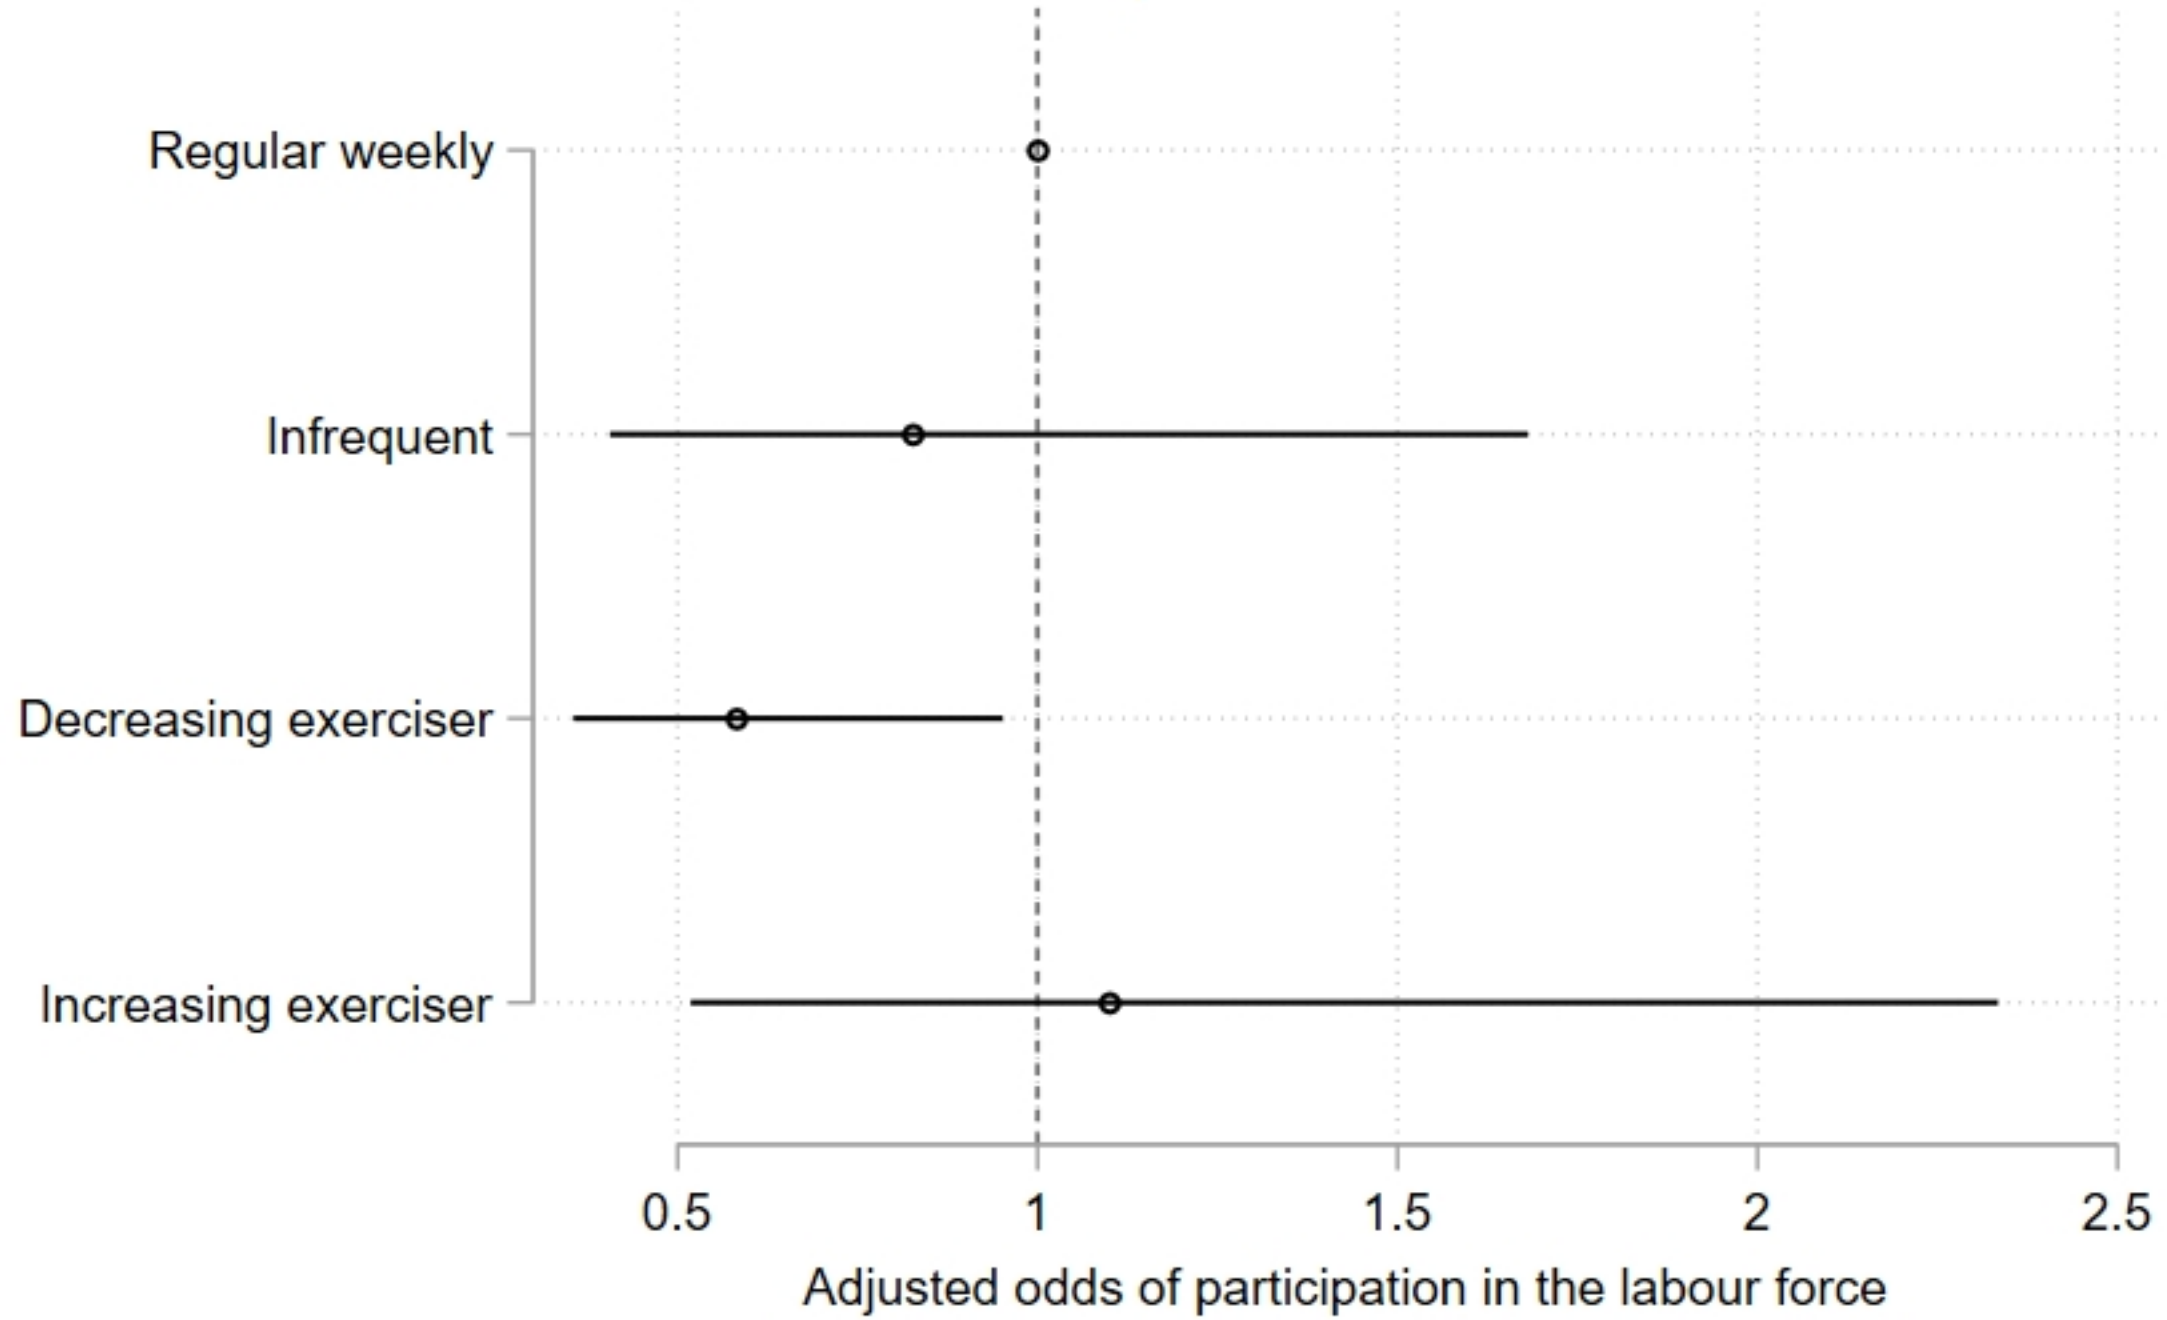

Figure 22
